# Supplementary material for: Applications of noisy quantum computing and quantum error mitigation to “adamantaneland”: a benchmarking study for quantum chemistry
Source: Royal Society of Chemistry journal article supplement (doi:10.1039/d3cp03523a), 2023-12-30
Supplement: d3cp03523a1.pdf [file d3cp03523a1.pdf]

**Electronic Supporting Information**

**Applications of noisy quantum computing  
and quantum error mitigation to  
“adamantaneland”: A benchmarking study  
for quantum chemistry**

Viki Kumar Prasad<sup>ab</sup>, Freeman Cheng<sup>c</sup>, Ulrich Fekl<sup>\*b</sup>, and  
Hans-Arno Jacobsen<sup>\*ac</sup>

<sup>a</sup> The Edward S. Rogers Sr. Department of Electrical and Computer  
Engineering, 10 King’s College Road, University of Toronto, Toronto, Ontario,  
Canada M5S 3G4

<sup>b</sup> Department of Chemical and Physical Sciences, 3359 Mississauga Road  
University of Toronto Mississauga, Mississauga, Ontario, Canada L5L 1C6

<sup>c</sup> Department of Computer Science, 40 St. George Street, University of Toronto,  
Toronto, Ontario, Canada M5S 2E4

\* Corresponding authors: [ulrich.fekl@utoronto.ca](mailto:ulrich.fekl@utoronto.ca) and [arno.jacobsen@utoronto.ca](mailto:arno.jacobsen@utoronto.ca)

## Data set details

The optimization of geometries employed a default self-consistent field convergence criterion of  $10^{-8}$  Hartree, *ultrafine* integration grid (pruned  $99 \times 590$  grid), and *tight* optimization convergence criteria (maximum force =  $1.5 \times 10^{-5}$  Hartree/Bohr, RMS force =  $1 \times 10^{-5}$  Hartree/Bohr, maximum displacement =  $6 \times 10^{-5}$  Bohr, RMS displacement =  $4 \times 10^{-5}$  Bohr). For transition state structures, the *CalcFC* and *NoEigenTest* options were used to compute force constants in the first step of the optimization and suppress the curvature test during optimization, respectively. Each optimized structure was subjected to an additional vibrational frequency calculation to verify the nature of the stationary point, i.e., all positive frequencies for minima and one negative frequency corresponding to the reaction coordinate for the transition state structure. For the isomer set, all geometry optimizations were started from identical looking structures reported in the work of Engler *et al.*[5] with the exception that we modeled two additional missing isomer structures resulting in overall 21 isomers of  $C_{10}H_{16}$ . All geometry optimizations successfully converged to the correct energy-relaxed stationary point and are included in the set. For the reaction set, we modeled the proposed route mapped out in the work of Kirchen *et al.*[10] (see Figure S1 below) which included performing geometry optimizations for obtaining the energy-relaxed structures of the reactant, transition state, and product of various steps. Tabulated below is also the information associated with the outcome of modeling each chemical reaction for the reaction set.

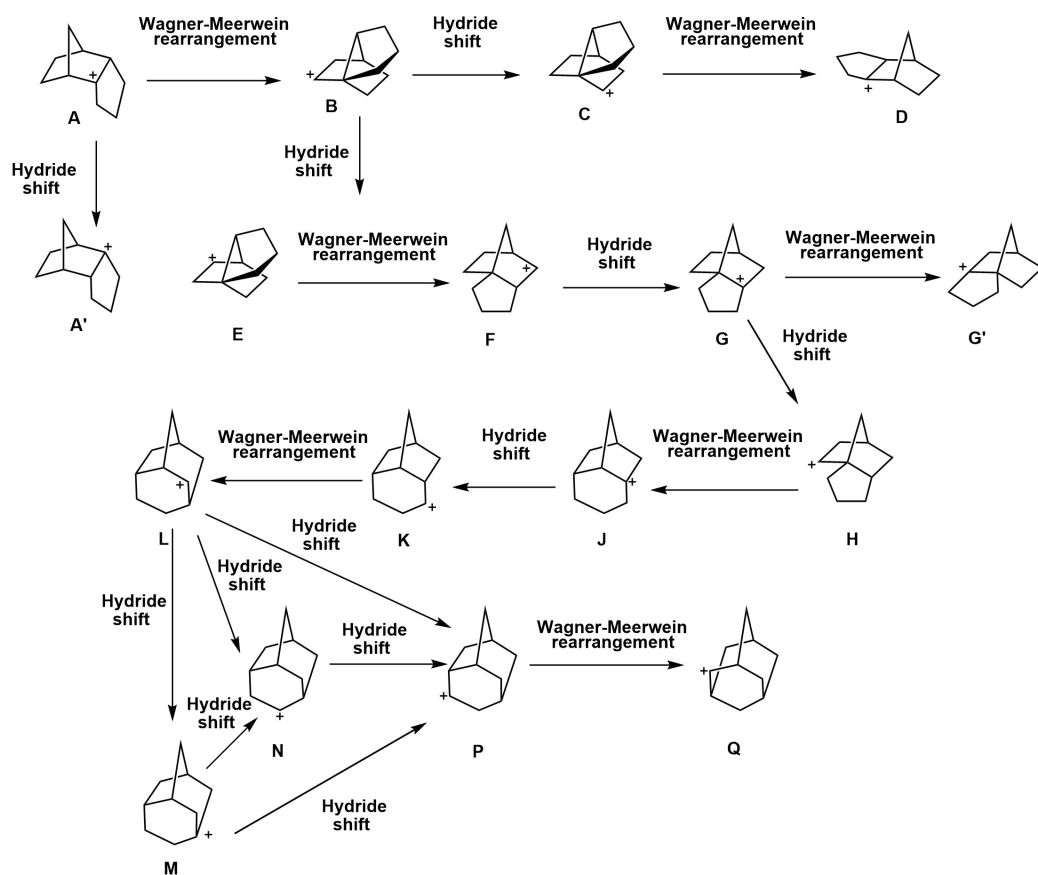

Figure S1: Chemical reaction scheme modeled in our work for the reaction set corresponding to the proposed route mapped out in figure 2 of the work of Kirchen *et al.*[10].

| Reaction | Remarks                                                                                                                                                                                                                                                                                                                                  |
|----------|------------------------------------------------------------------------------------------------------------------------------------------------------------------------------------------------------------------------------------------------------------------------------------------------------------------------------------------|
| A → A'   | Transition state structure successfully located (negative frequency of the normal mode corresponding to the reaction coordinate is $-641.45 \text{ cm}^{-1}$ ). No issues with geometry optimizations of reactant A and product A'.                                                                                                      |
| A → B    | Transition state structure not located (geometry optimization converges to a local minimum instead).<br>Geometry optimization of product B converges to that of more stable structure A.<br>No issues with geometry optimization of reactant A.                                                                                          |
| B → C    | Transition state structure successfully located (negative frequency of the normal mode corresponding to the reaction coordinate is $-457.05 \text{ cm}^{-1}$ ).<br>Geometry optimization of reactant B converges to that of more stable structure A.<br>Geometry optimization of product C converges to that of more stable structure D. |
| C → D    | Transition state structure not located (geometry optimization converges to a local minimum instead).<br>Geometry optimization of reactant C converges to that of more stable structure D.<br>No issues with geometry optimization of product D.                                                                                          |
| B → E    | Transition state structure successfully located (negative frequency of the normal mode corresponding to the reaction coordinate is $-598.77 \text{ cm}^{-1}$ ).<br>Geometry optimization of reactant B converges to that of more stable structure A.<br>Geometry optimization of product E converges to that of more stable structure F. |

|        |                                                                                                                                                                                                                                                                                                                                 |
|--------|---------------------------------------------------------------------------------------------------------------------------------------------------------------------------------------------------------------------------------------------------------------------------------------------------------------------------------|
| E → F  | <p>Transition state structure not located (geometry optimization converges to a local minimum instead).<br/> Geometry optimization of reactant E converges to that of more stable structure F.<br/> No issues with geometry optimization of product F.</p>                                                                      |
| F → G  | <p>Transition state structure successfully located (negative frequency of the normal mode corresponding to the reaction coordinate is <math>-538.36 \text{ cm}^{-1}</math>). No issues with geometry optimizations of reactant F and product G.</p>                                                                             |
| G → G' | <p>Transition state structure successfully located (negative frequency of the normal mode corresponding to the reaction coordinate is <math>-171.20 \text{ cm}^{-1}</math>). No issues with geometry optimizations of reactant G and product G'.</p>                                                                            |
| G → H  | <p>Transition state structure successfully located (negative frequency of the normal mode corresponding to the reaction coordinate is <math>-460.80 \text{ cm}^{-1}</math>).<br/> Geometry optimization of product H converges to that of more stable structure J.<br/> No issues with geometry optimization of reactant G.</p> |
| H → J  | <p>Transition state structure not located (geometry optimization converges to a local minimum instead).<br/> Geometry optimization of reactant H converges to that of more stable structure J.<br/> No issues with geometry optimization of product J.</p>                                                                      |
| J → K  | <p>Transition state structure successfully located (negative frequency of the normal mode corresponding to the reaction coordinate is <math>-750.29 \text{ cm}^{-1}</math>). No issues with geometry optimizations of reactant J and product K.</p>                                                                             |

|       |                                                                                                                                                                                                                                                                                                            |
|-------|------------------------------------------------------------------------------------------------------------------------------------------------------------------------------------------------------------------------------------------------------------------------------------------------------------|
| K → L | Transition state structure successfully located (negative frequency of the normal mode corresponding to the reaction coordinate is $-166.92 \text{ cm}^{-1}$ ). No issues with geometry optimizations of reactant K and product L.                                                                         |
| L → M | Transition state structure successfully located (negative frequency of the normal mode corresponding to the reaction coordinate is $-1359.35 \text{ cm}^{-1}$ ). No issues with geometry optimizations of reactant L and product M.                                                                        |
| L → N | Transition state structure successfully located (negative frequency of the normal mode corresponding to the reaction coordinate is $-394.35 \text{ cm}^{-1}$ ). No issues with geometry optimizations of reactant L and product N.                                                                         |
| M → N | Transition state structure successfully located (negative frequency of the normal mode corresponding to the reaction coordinate is $-1062.67 \text{ cm}^{-1}$ ). No issues with geometry optimizations of reactant M and product N.                                                                        |
| L → P | Transition state structure successfully located (negative frequency of the normal mode corresponding to the reaction coordinate is $-467.59 \text{ cm}^{-1}$ ).<br>Geometry optimization of product P converges to that of more stable structure Q.<br>No issues with geometry optimization of reactant L. |
| M → P | Transition state structure not located (geometry optimization converges to structure of a wrong mechanism).<br>Geometry optimization of product P converges to that of more stable structure Q.<br>No issues with geometry optimization of reactant M.                                                     |

|              |                                                                                                                                                                                                                                                                                                                                                     |
|--------------|-----------------------------------------------------------------------------------------------------------------------------------------------------------------------------------------------------------------------------------------------------------------------------------------------------------------------------------------------------|
| <p>N → P</p> | <p>Transition state structure successfully located (negative frequency of the normal mode corresponding to the reaction coordinate is <math>-492.65 \text{ cm}^{-1}</math>).<br/>           Geometry optimization of product P converges to that of more stable structure Q.<br/>           No issues with geometry optimization of reactant N.</p> |
| <p>P → Q</p> | <p>Transition state structure not located (geometry optimization converges to a local minimum instead).<br/>           Geometry optimization of reactant P converges to that of more stable structure Q.<br/>           No issues with geometry optimization of product Q.</p>                                                                      |

## Quantum state tomography

Given a prepared  $n$ -qubit quantum state  $|\psi\rangle$  in the Hilbert space  $\mathcal{H} = \mathbb{C}^{2^n}$ , quantum state tomography is a procedure to reconstruct  $\rho$  in  $B(\mathcal{H})$ , the space of bounded operators on  $\mathcal{H}$ . We do this by subjecting identical copies of  $|\psi\rangle$  to a sequence of measurements (here,  $3^n$  times).[1] Now, let us denote  $|\psi_i^+\rangle$  and  $|\psi_i^-\rangle$  as the eigenvectors of  $\sigma_i$  with corresponding eigenvalues of 1 and  $-1$  for  $i = 1, 2, 3$  and take  $|\psi_0^+\rangle = |0\rangle, |\psi_0^-\rangle = |1\rangle$ . Also, equip  $B(\mathcal{H})$  with the Hilbert–Schmidt inner product given by  $\langle S, T \rangle_{\text{Tr}} = \text{Tr}(S^\dagger T)$ , where  $\text{Tr}$  is the trace, and let  $\text{Pr}\left(|\psi_{i_j}^\pm\rangle \mid \rho\right)$  be the probability of measuring  $|\psi_{i_j}^\pm\rangle$  in the  $j$ -th qubit. As  $\left\{\frac{\sigma_0}{\sqrt{2}}, \frac{\sigma_1}{\sqrt{2}}, \frac{\sigma_2}{\sqrt{2}}, \frac{\sigma_3}{\sqrt{2}}\right\}$  forms an orthonormal basis for  $B(\mathbb{C}^2)$ , it follows from  $\text{Tr}$  being multiplicative with respect to the Kronecker tensor product that  $\left\{\frac{\sigma_0}{\sqrt{2}}, \frac{\sigma_1}{\sqrt{2}}, \frac{\sigma_2}{\sqrt{2}}, \frac{\sigma_3}{\sqrt{2}}\right\}^{\otimes_{i=1}^n}$  forms an orthonormal basis for  $B(\mathcal{H})$ . [11] Therefore,  $\rho$  can be decomposed as,

$$\rho = \frac{1}{2^n} \sum_{i \in \{0, \dots, 3\}^n} \langle \otimes_{j=1}^n \sigma_{i_j}, \rho \rangle \otimes_{j=1}^n \sigma_{i_j} \quad (1)$$

$$= \frac{1}{2^n} \sum_{i \in \{0, \dots, 3\}^n} \text{Tr} \left[ \left( \otimes_{j=1}^n \sigma_{i_j} \right) \rho \right] \otimes_{j=1}^n \sigma_{i_j} \quad (2)$$

$$= \frac{1}{2^n} \sum_{i \in \{0, \dots, 3\}^n} \langle \otimes_{j=1}^n \sigma_{i_j} \rangle \otimes_{j=1}^n \sigma_{i_j} \quad (3)$$

where,

$$\langle \otimes_{j=1}^n \sigma_{i_j} \rangle = \otimes_{j=1}^n \left( \text{Pr} \left( |\psi_{i_j}^+\rangle \mid \rho \right) - (-1)^{\delta(i_j, 0)} \text{Pr} \left( |\psi_{i_j}^-\rangle \mid \rho \right) \right) \quad (4)$$



Under a noisy system, we reconstruct  $\rho'_{\text{noisy}} \approx \rho$  (normalized to trace 1) by measuring in the appropriate basis  $\langle \otimes_{j=1}^n \sigma_{i_j} \rangle$ . As  $\sigma_0$  and  $\sigma_3$  share eigenvectors, measuring  $\langle \otimes_{j=1}^n \sigma_{i_j} \rangle$  for  $i \in \{1, \dots, 3\}^n$  is sufficient. Since it's possible that  $\rho'_{\text{noisy}}$  is not positive, maximum likelihood estimation is used to extract  $\rho' \approx \rho$  satisfying  $\text{Tr}(\rho') = 1$  and  $\rho' \geq 0$ . Assuming Gaussian noise with variance  $s^2$ , the probability of measuring  $m$  for  $\langle \otimes_{j=1}^n \sigma_{i_j} \rangle$  is,

$$\Pr(m | \rho) = \frac{1}{\sqrt{2\pi s^2}} \exp\left(-\frac{(m - \langle \otimes_{j=1}^n \sigma_{i_j} \rangle)^2}{2s^2}\right) \quad (5)$$

Maximum likelihood estimation under this assumption is equivalent to the constrained least-squares optimization problem (see below),

$$\begin{aligned} \min_{\rho'} \quad & \|\rho' - \rho'_{\text{noisy}}\|_{\text{Tr}}^2 \\ \text{subject to} \quad & \rho' \geq 0, \text{Tr}(\rho') = 1 \end{aligned} \quad (6)$$

for which the method developed by Smolin *et al.*[12] is used to obtain  $\rho'$  in  $O(2^{3n})$ .

### Maximum likelihood estimation for $\hat{\rho}$ in quantum state tomography

Let  $m = \{m_i \mid i \in \{0, 1, 2, 3\}^n\}$ .

We have,

$$\begin{aligned}
\log [\Pr(m_i | \rho)] &= \log \left[ \frac{1}{\sqrt{2\pi s^2}} \exp \left( -\frac{\left( m - \left\langle \bigotimes_{j=1}^n \sigma_{i_j} \right\rangle \right)^2}{2s^2} \right) \right] \\
&= \log \left[ \frac{1}{\sqrt{2\pi s^2}} \right] + \log [2s^2] \\
&\quad - \left( m - \left\langle \bigotimes_{j=1}^n \sigma_{i_j} \right\rangle \right)^2.
\end{aligned}$$

Then,

$$\begin{aligned}
\arg \max_{\rho} \Pr(m | \rho) &= \arg \max_{\rho} \log [\Pr(m | \rho)] \\
&= \arg \max_{\rho} \log \left[ \prod_{i \in \{0,1,2,3\}^n} \Pr(m_i | \rho) \right] \\
&= \arg \min_{\rho} \sum_{i \in \{0,1,2,3\}^n} \left( m - \left\langle \bigotimes_{j=1}^n \sigma_{i_j} \right\rangle \right)^2 \\
&= \arg \min_{\rho} \|\hat{\rho}_{\text{noisy}} - \hat{\rho}\|_{\text{Tr}}^2.
\end{aligned}$$

## Noisy simulation

Our noise model (excluding readout error) is a combination of  $\varepsilon^{\text{DP}}$  (a depolarizing channel),  $\varepsilon^{\text{AD}}$  (a Clifford and measurement channel approximation of an amplitude damping channel[8]), and  $\varepsilon^{\text{PD}}$  (a phase damping channel). Specifically, our noise

model is described by applying the quantum channel,

$$\varepsilon_{q_i}^{\text{one}} = \underbrace{\varepsilon_{q_i}^{\text{PD}} \circ \varepsilon_{q_i}^{\text{AD}}}_{\varepsilon_{q_i}^{\text{TR}}} \circ \varepsilon_{q_i}^{\text{DP}} \quad (7)$$

after a one-qubit gate  $g$  on qubit  $q_i$  and

$$\varepsilon_{q_i, q_j}^{\text{two}} = \underbrace{[(\varepsilon_{q_i}^{\text{PD}} \circ \varepsilon_{q_i}^{\text{AD}}) \otimes (\varepsilon_{q_j}^{\text{PD}} \circ \varepsilon_{q_j}^{\text{AD}})]}_{\varepsilon_{q_i, q_j}^{\text{TR}}} \circ \varepsilon_{q_i, q_j}^{\text{DP}} \quad (8)$$

after a two-qubit gate  $g$  on qubit  $q_i$  and  $q_j$ . [6, 3] The channels take in as parameters  $g_e$  (average gate error),  $g_t$  (gate time),  $T_1$  (relaxation time), and  $T_2$  (dephasing time). Readout error is simulated by assuming the independence of each qubit’s readout error. This is valid for  $T_1[q] \leq T_2[q]$  for all qubits  $q$  (see Reference [6] for more details). The Gottesman–Knill theorem allows our noise model to be efficiently simulated with a stabilizer circuit simulator such as Stim[7]. This allows our benchmarking framework to be extended to use stabilizer-circuit-based bootstrapping methods like Clifford Data Regression (CDR).[4]

## Additional VQE details

Solving the electronic structure problem via the VQE algorithm requires some key steps. At first, the molecular Hamiltonian  $\hat{H}$  is expressed in the second quantization formalism,

$$\hat{H} = \sum_{pq} h_{pq} a_p^\dagger a_q + \frac{1}{2} \sum_{pqrs} h_{pqrs} a_p^\dagger a_q^\dagger a_r a_s \quad (9)$$

where  $p, q, r, s$  are the indices corresponding to the spin orbitals whereas  $a_p, a_p^\dagger, h_{pq}$ , and  $h_{pqrs}$  represent an annihilation op-

erator acting on the  $p$ -th spin-orbital, a creation operator acting on the  $p$ -th spin-orbital, one-electron molecular orbital integrals, and two-electron molecular orbital integrals, respectively.

Another step in the execution of VQE includes transforming the second quantized Hamiltonian to an equivalent spin-based Hamiltonian. Such transformation is performed to map the electronic structure problem from fermionic to qubit representation (where each qubit directly maps to one spin-orbital) via well-known schemes. The Hamiltonian yielded via the fermion–qubit transformation can then be described by a linear combination of Pauli spin operators,

$$\hat{H} = \sum_i w_i \hat{P}_i \quad (10)$$

where each  $\hat{P}_i$  term is multiplied by the corresponding Hamiltonian coefficient  $w_i$  and comprises a tensor product belonging to  $\{\sigma_0, \sigma_1, \sigma_2, \sigma_3\}$  operators or  $\{I, X, Y, Z\}$  quantum gates acting on the  $i$ -th qubit,

$$\hat{P}_i = \sigma_N \otimes \sigma_{N-1} \otimes \cdots \otimes \sigma_1 \quad (11)$$

The variational energy (Equation 1) is produced by grouping the individual Pauli term expectation values. These expectations are obtained by performing repetitive measurements. More details about measurement techniques can be found in References [2, 16].

For comparison with traditional quantum chemistry methods, the energetic reference data from Tables 1 and 2 in the main manuscript were used, i.e.,  $\Delta E_{ref}^{iso}$  and  $\Delta E_{ref}^\ddagger$ . The experiments conducted on *FakeQuito* backend and *ibmq\_quito* device using error mitigation were aimed at reproducing the exact di-

agonalization results of the frozen-orbitals system as obtained from the noiseless statevector simulations. The initial HF calculation was performed internally in *qiskit* with an interface to the *PySCF*[15] computational chemistry program. Calculations for each molecule on the statevector and *FakeQuito* backend used 8912 shots per VQE iteration and were repeated 10 times for (2,2) active space and 5 times for (4,4) and (6,6) active spaces. Therefore, the error statistics for these simulations were obtained on the average value of the ten runs for (2,2) active space and five runs for (4,4) and (6,6) active spaces. For molecules in our data set, chosen (2,2) active space corresponds to the highest occupied molecular orbital (HOMO) and lowest unoccupied molecular orbital (LUMO), whereas the (4,4) and (6,6) active spaces correspond to up to two molecular orbitals below the HOMO and up to two molecular orbitals above the LUMO. To minimize the energy in each VQE iteration, we utilized the Simultaneous Perturbation Stochastic Approximation (SPSA) optimizer, which is particularly recommended for noisy simulations.[13, 14, 9] For a (2,2) active space calculation, we use 100 iterations of the SPSA algorithm, which comprises 251 energy evaluations: the first 50 evaluations to tune the learning rate and perturbation coefficients as required by the optimization algorithm, followed by the next 200 for gradient calculations, and the final evaluation to obtain the energy expectation value. To attain energy convergence with larger (4,4) and (6,6) active spaces, we use 500 iterations of the SPSA algorithm, which comprises overall 1051 energy evaluations.

## References

- [1] Joseph B. Altepeter, Daniel F.V. James, and Paul G. Kwiat. “4 Qubit Quantum State Tomography”. en. In: *Quantum State Estimation*. Ed. by Matteo Paris and Jaroslav Řeháček. Lecture Notes in Physics. Berlin, Heidelberg: Springer, 2004, pp. 113–145. ISBN: 978-3-540-44481-7. DOI: 10.1007/978-3-540-44481-7\_4. URL: [https://doi.org/10.1007/978-3-540-44481-7\\_4](https://doi.org/10.1007/978-3-540-44481-7_4) (visited on 06/21/2023).
- [2] Kishor Bharti et al. “Noisy intermediate-scale quantum algorithms”. In: *Rev. Mod. Phys.* 94.1 (Feb. 2022). Publisher: American Physical Society, p. 015004. DOI: 10.1103/RevModPhys.94.015004. URL: <https://link.aps.org/doi/10.1103/RevModPhys.94.015004> (visited on 06/05/2023).
- [3] Carsten Blank et al. “Quantum classifier with tailored quantum kernel”. en. In: *npj Quantum Inf.* 6.1 (May 2020). Number: 1 Publisher: Nature Publishing Group, pp. 1–7. ISSN: 2056-6387. DOI: 10.1038/s41534-020-0272-6. URL: <https://www.nature.com/articles/s41534-020-0272-6> (visited on 07/14/2023).
- [4] Piotr Czarnik et al. “Error mitigation with Clifford quantum-circuit data”. en-GB. In: *Quantum* 5 (Nov. 2021). Publisher: Verein zur Förderung des Open Access Publizierens in den Quantenwissenschaften, p. 592. DOI: 10.22331/q-2021-11-26-592. URL: <https://quantum-journal.org/papers/q-2021-11-26-592/> (visited on 07/06/2023).
- [5] E. M. Engler et al. “Mechanism of adamantane rearrangements”. In: *J. Am. Chem. Soc.* 95.17 (Aug. 1973). Publisher: American Chemical Society, pp. 5769–5771. ISSN: 0002-7863. DOI: 10.1021/ja00798a059. URL: <https://doi.org/10.1021/ja00798a059>.
- [6] Konstantinos Georgopoulos, Clive Emary, and Paolo Zuliani. “Modeling and simulating the noisy behavior of near-term quantum computers”. In: *Phys. Rev. A* 104.6 (Dec. 2021). Publisher: American Physical Society, p. 062432. DOI: 10.1103/PhysRevA.104.062432. URL: <https://link.aps.org/doi/10.1103/PhysRevA.104.062432> (visited on 07/14/2023).

- [7] Craig Gidney. “Stim: a fast stabilizer circuit simulator”. en-GB. In: *Quantum* 5 (July 2021). Publisher: Verein zur Förderung des Open Access Publizierens in den Quantenwissenschaften, p. 497. DOI: 10.22331/q-2021-07-06-497. URL: <https://quantum-journal.org/papers/q-2021-07-06-497/> (visited on 07/06/2023).
- [8] Mauricio Gutiérrez et al. “Approximation of realistic errors by Clifford channels and Pauli measurements”. In: *Phys. Rev. A* 87.3 (Mar. 2013). Publisher: American Physical Society, p. 030302. DOI: 10.1103/PhysRevA.87.030302. URL: <https://link.aps.org/doi/10.1103/PhysRevA.87.030302> (visited on 07/06/2023).
- [9] Abhinav Kandala et al. “Hardware-efficient variational quantum eigensolver for small molecules and quantum magnets”. en. In: *Nature* 549.7671 (Sept. 2017). Number: 7671 Publisher: Nature Publishing Group, pp. 242–246. ISSN: 1476-4687. DOI: 10.1038/nature23879. URL: <https://www.nature.com/articles/nature23879> (visited on 06/05/2023).
- [10] Roger P. Kirchen, Ted S. Sorensen, and Steven M. Whitworth. “A mechanistic study of the carbocation route from tetrahydrodicyclopentadiene to the adamantane ring”. In: *Can. J. Chem.* 71.12 (Dec. 1993). Publisher: NRC Research Press, pp. 2016–2027. ISSN: 0008-4042. DOI: 10.1139/v93-251. URL: <https://doi.org/10.1139/v93-251> (visited on 06/05/2023).
- [11] Gert K. Pedersen. “Hilbert Spaces”. en. In: *Analysis Now*. Ed. by Gert K. Pedersen. Graduate Texts in Mathematics. New York, NY: Springer, 1989, pp. 79–125. ISBN: 978-1-4612-1007-8. DOI: 10.1007/978-1-4612-1007-8\_3. URL: [https://doi.org/10.1007/978-1-4612-1007-8\\_3](https://doi.org/10.1007/978-1-4612-1007-8_3) (visited on 06/21/2023).
- [12] John A. Smolin, Jay M. Gambetta, and Graeme Smith. “Efficient Method for Computing the Maximum-Likelihood Quantum State from Measurements with Additive Gaussian Noise”. In: *Phys. Rev. Lett.* 108.7 (Feb. 2012). Publisher: American Physical Society, p. 070502. DOI: 10.1103/PhysRevLett.108.070502. URL: <https://link.aps.org/doi/10.1103/PhysRevLett.108.070502> (visited on 06/21/2023).
- [13] J.C. Spall. “Accelerated second-order stochastic optimization using only function measurements”. In: *Proceedings of the 36th IEEE Conference on Decision and Control*. Vol. 2. 1997, 1417–1424 vol.2. DOI: 10.1109/CDC.1997.657661.

- [14] James C. Spall. “An overview of the simultaneous perturbation method for efficient optimization”. In: *Johns Hopkins APL Technical Digest* 19 (1998), pp. 482–492.
- [15] Qiming Sun et al. “Recent developments in the PySCF program package”. In: *J. Chem. Phys.* 153.2 (July 2020), p. 024109. ISSN: 0021-9606. DOI: 10.1063/5.0006074. URL: <https://doi.org/10.1063/5.0006074> (visited on 07/14/2023).
- [16] Jules Tilly et al. “The Variational Quantum Eigensolver: A review of methods and best practices”. en. In: *Phys. Rep.* The Variational Quantum Eigensolver: a review of methods and best practices 986 (Nov. 2022), pp. 1–128. ISSN: 0370-1573. DOI: 10.1016/j.physrep.2022.08.003. URL: <https://www.sciencedirect.com/science/article/pii/S0370157322003118> (visited on 06/05/2023).



## Optimized geometry of 1 from the isomer set

26

0 1

C -0.891558 0.927572 -1.210071  
C -0.039234 1.530094 -0.090254  
C 1.405086 1.044009 -0.235073  
C 1.447748 -0.483579 -0.145304  
C 0.891617 -0.927569 1.210012  
C -0.553954 -0.446206 1.358173  
C -1.405198 -1.043958 0.235039  
C -0.854469 -0.600276 -1.122599  
C 0.591792 -1.081361 -1.264875  
C -0.591801 1.081292 1.264953  
H -1.920977 1.281703 -1.127880  
H -0.517513 1.255361 -2.181945  
H -0.067078 2.618702 -0.154514  
H 1.816298 1.373707 -1.191158  
H 2.026964 1.481817 0.548195  
H 2.477725 -0.827698 -0.248705  
H 1.505139 -0.521816 2.016755  
H 0.933442 -2.015347 1.292905  
H -0.948099 -0.763629 2.324541  
H -2.442896 -0.721610 0.340798  
H -1.400691 -2.133612 0.302153  
H -1.462399 -1.027332 -1.921361  
H 0.628777 -2.171636 -1.221943  
H 0.989802 -0.786254 -2.237695  
H -1.616373 1.437895 1.387295  
H -0.002295 1.519643 2.072558

## Optimized geometry of exo-2 from the isomer set

26

0 1

C 2.123458 -0.776830 -0.503963  
C 0.878758 -1.126834 0.324289  
C 2.123458 0.776830 -0.503963  
H 2.074591 -1.197126 -1.506921  
H 3.023783 -1.166526 -0.032072  
C 0.878758 1.126834 0.324289  
H 2.074591 1.197126 -1.506921  
H 3.023783 1.166526 -0.032072  
C 0.887598 0.000000 1.365108  
H 0.018394 0.000000 2.018679  
H 1.783960 0.000000 1.984075  
C -0.361315 -0.783011 -0.511774  
H 0.877909 -2.142434 0.714225  
C -0.361315 0.783011 -0.511774  
H 0.877909 2.142434 0.714225  
C -1.714242 -1.197582 0.080763  
C -1.714242 1.197582 0.080763  
C -2.628543 0.000000 -0.170512  
H -2.091473 2.121961 -0.352699  
H -1.618871 1.364611 1.155012  
H -2.960900 0.000000 -1.210346  
H -3.519803 0.000000 0.454853  
H -1.618871 -1.364611 1.155012  
H -2.091473 -2.121961 -0.352699  
H -0.263885 1.181758 -1.520862  
H -0.263885 -1.181758 -1.520862

## Optimized geometry of endo-2 from the isomer set

26

0 1

C -1.362112 -0.775742 1.135935  
C -1.050595 -1.129386 -0.323861  
C -1.362112 0.775742 1.135935  
H -0.650834 -1.197193 1.840576  
H -2.341395 -1.164880 1.409375  
C -1.050595 1.129386 -0.323861  
H -0.650834 1.197193 1.840576  
H -2.341395 1.164880 1.409375  
C -1.793176 -0.000000 -1.057009  
H -1.618258 -0.000000 -2.132237  
H -2.867388 -0.000000 -0.873505  
C 0.404365 -0.782913 -0.690204  
H -1.340372 -2.141874 -0.595747  
C 0.404365 0.782913 -0.690204  
H -1.340372 2.141874 -0.595747  
C 1.570215 -1.202675 0.209169  
H 0.591415 -1.148449 -1.699914  
C 1.570215 1.202675 0.209169  
H 0.591415 1.148449 -1.699914  
C 2.516101 0.000000 0.171268  
H 1.240042 1.366126 1.234080  
H 2.044503 2.124512 -0.122306  
H 3.243320 0.000000 0.981813  
H 3.075575 0.000000 -0.766230  
H 2.044503 -2.124512 -0.122306  
H 1.240042 -1.366126 1.234080

## Optimized geometry of 3 from the isomer set

26

0 1

C -0.482594 -1.347440 -0.971677  
C 0.761967 -1.301148 -0.065209  
C 0.362730 -0.901734 1.355484  
C -0.477438 0.377691 1.273662  
H 1.256152 -0.754265 1.963299  
H -0.217911 -1.688055 1.838911  
C -1.413352 -0.138075 -0.824359  
H -1.053806 -2.247343 -0.732813  
H -0.165173 -1.447973 -2.011157  
C -1.822437 0.014633 0.639620  
H -2.260870 -0.886245 1.068194  
H -2.544934 0.824518 0.748551  
C 1.837425 -0.312950 -0.553082  
H 1.196708 -2.300851 -0.061658  
C 1.627484 1.094828 0.021400  
H 1.840878 -0.284990 -1.642603  
H 2.820789 -0.677652 -0.256413  
C 0.147516 1.378805 0.250351  
H 2.053746 1.843573 -0.646250  
H 2.160263 1.193397 0.967985  
H -0.585045 0.827041 2.259308  
C -0.676754 1.182736 -1.045721  
H -2.265417 -0.251637 -1.494011  
H -1.401660 1.987495 -1.162847  
H -0.052692 1.181575 -1.938313  
H 0.031695 2.397342 0.617003

## Optimized geometry of 4 from the isomer set

26

0 1

C 0.000000 0.000005 -1.560367  
C 0.468383 -1.119740 -0.621205  
C -0.468383 1.119745 -0.621198  
H -0.815944 -0.312528 -2.210555  
H 0.815944 0.312544 -2.210553  
C 0.468383 1.119740 0.621205  
C -0.000000 -0.000005 1.560367  
C -0.468383 -1.119745 0.621198  
H -0.815944 0.312528 2.210555  
H 0.815944 -0.312544 2.210553  
C 1.894702 -0.745559 -0.204380  
H 0.445557 -2.092244 -1.110873  
C 1.894702 0.745559 0.204381  
H 2.583402 -0.918666 -1.030547  
H 2.229388 -1.374851 0.620146  
H 2.229388 1.374851 -0.620145  
H 2.583402 0.918666 1.030548  
H 0.445557 2.092244 1.110873  
C -1.894702 0.745561 -0.204375  
H -0.445557 2.092251 -1.110858  
C -1.894702 -0.745561 0.204375  
H -2.583402 0.918673 -1.030541  
H -2.229388 1.374847 0.620155  
H -0.445557 -2.092251 1.110858  
H -2.229388 -1.374847 -0.620155  
H -2.583402 -0.918673 1.030541

## Optimized geometry of syn-5 from the isomer set

26

0 1

C -0.828596 -1.569685 -0.659810  
C -2.012346 -0.870890 0.002601  
C -1.423341 0.401495 0.622958  
H -2.412766 -1.503926 0.796455  
H -2.831036 -0.665576 -0.686387  
C 0.016095 0.009733 1.022365  
C 0.352409 -1.319570 0.290420  
H -0.625099 -1.116624 -1.630766  
H -1.007802 -2.628751 -0.838397  
C 1.722250 -1.114403 -0.388577  
H 0.403361 -2.134195 1.011392  
C 0.976012 1.045898 0.425190  
C 2.235042 0.253536 0.091284  
H 2.835096 0.129922 0.993654  
H 2.866810 0.747926 -0.646338  
H 1.604324 -1.118271 -1.471625  
H 2.426025 -1.910137 -0.153736  
C -1.256561 1.592659 -0.347062  
H -2.019004 0.709096 1.479878  
C 0.210205 1.595251 -0.783547  
H -1.478160 2.519604 0.182100  
H -1.945669 1.539509 -1.189328  
H 1.180271 1.857171 1.124761  
H 0.351643 0.938737 -1.642180  
H 0.559355 2.582335 -1.082253  
H 0.145639 -0.090977 2.097845

## Optimized geometry of anti-5 from the isomer set

26

0 1

C -1.739886 -1.406032 0.183334  
C -0.349187 -2.209511 0.183430  
C 0.713438 -1.236653 -0.413680  
H -0.434972 -3.135394 -0.379884  
H -0.087536 -2.481517 1.205112  
C -0.000007 0.000019 -0.105684  
C -1.427708 0.000475 -0.413715  
H -2.106389 -1.315251 1.204958  
H -2.499046 -1.942815 -0.380120  
C -1.738936 1.407181 0.183320  
H -1.610925 0.000539 -1.490516  
C 0.714247 1.236190 -0.413680  
H -0.000015 0.000017 1.001360  
C -0.347703 2.209773 0.183421  
H -0.432877 3.135719 -0.379874  
H -0.085897 2.481591 1.205114  
H -2.105466 1.316674 1.204956  
H -2.497774 1.944446 -0.380109  
C 2.087580 -0.803767 0.183314  
H 0.804893 -1.395379 -1.490475  
C 2.088163 0.802344 0.183309  
H 2.932037 -1.192933 -0.380058  
H 2.192165 -1.166453 1.204982  
H 0.805867 1.394783 -1.490485  
H 2.932848 1.190895 -0.380137  
H 2.193077 1.164969 1.204967

## Optimized geometry of syn-6 from the isomer set

26

0 1

C -0.067902 -1.461487 -0.898087  
C 1.006700 -1.127925 0.168689  
C 0.239447 -0.272799 1.190842  
C -1.387487 -0.829345 -0.406624  
H -0.185918 -2.540642 -0.980856  
H 0.209344 -1.099286 -1.887760  
C 0.358376 1.180446 0.634324  
C -1.589114 0.615599 -0.905226  
C -0.967635 1.652143 0.039373  
H -2.654248 0.826049 -1.001861  
H -1.172227 0.711923 -1.908060  
H -1.665340 1.857732 0.851069  
H -0.825979 2.599562 -0.481651  
C 2.137649 -0.229879 -0.311168  
H 1.387229 -2.045206 0.615016  
C 1.489724 1.149752 -0.420451  
H 2.583689 -0.565391 -1.246751  
H 2.930640 -0.217797 0.438225  
H 0.631200 1.855092 1.444372  
H 1.067065 1.283814 -1.416221  
H 2.204140 1.957988 -0.278212  
C -1.184853 -0.812307 1.110390  
H 0.668482 -0.339231 2.188964  
H -2.238468 -1.436035 -0.710603  
H -1.921944 -0.212014 1.640978  
H -1.227105 -1.821749 1.520970



## Optimized geometry of anti-6 from the isomer set

26

0 1

C -0.198632 -1.472828 -0.884481  
C 0.997104 -1.161263 0.103691  
C 0.270225 -0.205472 1.027704  
C -1.494594 -0.793670 -0.284479  
H -0.372891 -2.548182 -0.912911  
H 0.003350 -1.166549 -1.910464  
C 0.347118 0.990010 0.049513  
C -1.865364 0.680787 -0.668774  
C -0.961330 1.755094 0.024197  
H -2.915230 0.834661 -0.417769  
H -1.775963 0.807804 -1.749322  
H -1.330868 2.032606 1.010948  
H -0.928642 2.659887 -0.580271  
C 2.214287 -0.289070 -0.363884  
H 1.342443 -2.082585 0.569931  
C 1.855261 1.199253 0.001489  
H 2.387008 -0.379621 -1.435902  
H 3.123140 -0.620848 0.133878  
H 0.269123 0.574604 -0.947932  
H 2.180520 1.893886 -0.769864  
H 2.299856 1.504954 0.948205  
C -1.130991 -0.748093 1.190877  
H 0.782355 0.025868 1.962152  
H -2.356386 -1.418989 -0.508155  
H -1.792697 -0.111749 1.776163  
H -1.113622 -1.734236 1.656201

## Optimized geometry of 7 from the isomer set

26

0 1

C 0.148668 0.674121 0.255387  
C -0.256140 -0.178916 1.479065  
C -1.206553 -1.250900 0.891370  
H -0.732894 0.437587 2.239047  
H 0.614360 -0.636532 1.944680  
C -1.273969 -0.862046 -0.589003  
H -2.191711 -1.244325 1.353949  
H -0.800049 -2.252295 1.020093  
C -2.047851 0.472744 -0.689137  
C -1.053696 1.536128 -0.118230  
H -2.984759 0.434258 -0.136174  
H -2.294925 0.696486 -1.725447  
H -1.467500 2.082728 0.727415  
H -0.784520 2.266061 -0.880988  
C 0.142488 -0.361426 -0.873039  
H -1.670308 -1.639802 -1.237638  
C 1.433762 -1.138772 -0.658815  
H 0.182822 0.143342 -1.841642  
C 2.420596 -0.072643 -0.098466  
H 1.804290 -1.594408 -1.574228  
H 1.297828 -1.944416 0.059961  
C 1.577805 1.176700 0.288649  
H 3.172296 0.191321 -0.839373  
H 2.962405 -0.464730 0.759645  
H 1.871235 1.587000 1.253844  
H 1.710771 1.967784 -0.449834

## Optimized geometry of exo-8 from the isomer set

26

0 1

C -0.975684 -1.346480 -0.704005

details C -2.227461 -0.462606 -0.446958

C -1.719016 0.609675 0.536094

H -3.031917 -1.043874 -0.000176

H -2.620244 -0.017533 -1.359764

C 0.118631 -0.615436 0.073909

H -0.729347 -1.436470 -1.761246

H -1.120001 -2.354360 -0.315172

C 0.386172 0.743961 -0.613513

C -0.833327 1.607515 -0.226357

H -0.538739 2.433238 0.422036

H -1.341512 2.035581 -1.088704

C -0.666720 -0.174110 1.320516

H -2.510158 1.077863 1.116891

H -0.086185 0.444513 2.003147

H -1.073124 -1.019766 1.875636

C 1.484498 -1.272579 0.274438

C 2.529005 -0.193927 -0.094977

H 1.598264 -2.156889 -0.350901

H 1.603805 -1.603467 1.305653

C 1.765136 1.134275 -0.095267

H 1.683679 1.526816 0.919596

H 2.251202 1.900755 -0.697072

H 2.916026 -0.386172 -1.095810

H 3.384581 -0.187978 0.577390

H 0.446268 0.606018 -1.694784

## Optimized geometry of endo-8 from the isomer set

26

0 1

C 0.428191 -0.970003 1.053794  
C 1.889787 -0.466117 1.003919  
C 1.921046 0.293733 -0.324585  
H 2.591625 -1.298740 0.990758  
H 2.150528 0.169424 1.848139  
C -0.152332 -0.568918 -0.320257  
H -0.132525 -0.544386 1.882611  
H 0.382628 -2.052477 1.166013  
C -0.389193 0.943618 -0.367816  
C 1.010587 1.539000 -0.152549  
H 1.233998 2.315132 -0.881721  
H 1.141239 1.978472 0.836342  
C 1.086655 -0.662531 -1.211336  
H 2.922851 0.521856 -0.679668  
H 0.910374 -0.289748 -2.219495  
H 1.532551 -1.654880 -1.271722  
C -1.543888 -1.108050 -0.577971  
C -2.453826 -0.136088 0.229858  
H -1.676193 -2.144323 -0.271659  
H -1.778919 -1.048746 -1.640925  
C -1.619705 1.152397 0.499186  
H -0.689351 1.162312 -1.396231  
H -2.168985 2.056155 0.244369  
H -1.354607 1.230539 1.552642  
H -2.764601 -0.591484 1.167892  
H -3.364547 0.088643 -0.320809

## Optimized geometry of 9 from the isomer set

26

0 1

C -0.439125 0.746633 -1.358613  
C -0.107302 1.362809 0.022451  
C -1.107879 -0.557878 -0.942488  
H 0.443985 0.623109 -1.978931  
H -1.139696 1.364519 -1.918497  
C -1.011957 0.552938 1.002483  
C -0.326916 -0.763422 1.354890  
C -0.110276 -1.369439 -0.054055  
H -0.994397 -1.378285 1.956920  
H 0.594105 -0.649207 1.917576  
C -2.106722 0.004751 0.077170  
H -1.525851 -1.137126 -1.762454  
H -1.347615 1.131552 1.859863  
H -2.724540 -0.746679 0.566261  
H -2.754639 0.765734 -0.355023  
C 1.398616 1.311739 0.288676  
H -0.407549 2.409639 0.054545  
C 2.123001 -0.051271 0.107307  
H 1.597133 1.680254 1.296347  
H 1.855239 2.038709 -0.383106  
C 1.353868 -1.245366 -0.495466  
H 2.496195 -0.363508 1.080553  
H 3.015893 0.106121 -0.496911  
H -0.393321 -2.420382 -0.071127  
H 1.889727 -2.146627 -0.196329  
H 1.403483 -1.226794 -1.583815

## Optimized geometry of 10 from the isomer set

26

0 1

C -1.152947 1.348378 -0.384327  
C -0.000000 0.784258 -1.217512  
C -0.789559 0.728641 0.974694  
C 0.789560 0.728641 0.974693  
C 1.425426 -0.665221 0.974262  
C -0.000000 -0.789450 -1.129403  
C 1.152947 1.348378 -0.384328  
H 2.147245 1.063811 -0.720574  
H 1.110304 2.436087 -0.374221  
H -0.000001 1.118497 -2.253133  
C 1.253095 -1.311188 -0.412717  
C -1.425425 -0.665221 0.974263  
C -1.253095 -1.311188 -0.412716  
H -2.147245 1.063811 -0.720573  
H -1.110304 2.436087 -0.374221  
H 1.162848 1.305327 1.818314  
H -1.162847 1.305327 1.818315  
H -1.006947 -1.292591 1.757530  
H -2.487020 -0.566236 1.201800  
H -2.128026 -1.101643 -1.026302  
H -1.198486 -2.396218 -0.329723  
H 2.487020 -0.566236 1.201798  
H 1.006948 -1.292591 1.757530  
H 1.198486 -2.396218 -0.329724  
H 2.128025 -1.101643 -1.026304  
H -0.000001 -1.191745 -2.141974

## Optimized geometry of syn-11 from the isomer set

26

0 1

C -1.449671 -0.955706 -0.776645  
C -0.787760 0.381892 -1.161491  
C -1.449676 -0.955703 0.776643  
H -0.966818 -1.828077 -1.202552  
H -2.472000 -0.957328 -1.151063  
C -0.787766 0.381896 1.161487  
H -0.966828 -1.828072 1.202558  
H -2.472008 -0.957321 1.151054  
C 0.787760 0.381895 1.161490  
C 1.449671 -0.955704 0.776647  
C 1.449676 -0.955705 -0.776640  
H 0.966818 -1.828074 1.202557  
H 2.472000 -0.957325 1.151066  
C -1.295626 1.243916 -0.000005  
H -1.141696 0.726393 2.130877  
H -0.954863 2.272510 -0.000006  
H -2.385666 1.267735 -0.000008  
C 1.295626 1.243916 0.000002  
H 1.141686 0.726390 2.130882  
C 0.787766 0.381893 -1.161488  
H -1.141686 0.726384 -2.130884  
H 2.385666 1.267735 0.000005  
H 0.954863 2.272510 0.000000  
H 1.141696 0.726388 -2.130879  
H 0.966828 -1.828075 -1.202553  
H 2.472008 -0.957324 -1.151052

## Optimized geometry of anti-11 from the isomer set

26

0 1

C -1.899765 -0.779535 0.344867  
C -0.634913 -1.166342 -0.445726  
C -1.899766 0.779535 0.344867  
H -1.913523 -1.200924 1.347775  
H -2.781946 -1.157512 -0.168821  
C -0.634913 1.166342 -0.445726  
H -1.913523 1.200925 1.347774  
H -2.781946 1.157512 -0.168822  
C 0.634913 1.166342 0.445726  
C 0.634913 -1.166342 0.445726  
C -0.570568 -0.000000 -1.433247  
H -0.737413 2.132097 -0.938686  
H 0.298252 -0.000000 -2.081567  
H -1.452179 -0.000000 -2.075890  
H -0.737413 -2.132097 -0.938686  
C 1.899766 0.779535 -0.344867  
C 1.899765 -0.779535 -0.344867  
H 2.781946 1.157512 0.168822  
H 1.913523 1.200925 -1.347774  
H 2.781946 -1.157512 0.168821  
H 1.913523 -1.200924 -1.347775  
C 0.570568 -0.000000 1.433247  
H 0.737413 2.132097 0.938686  
H 0.737413 -2.132097 0.938686  
H -0.298251 -0.000000 2.081567  
H 1.452180 -0.000000 2.075890



## Optimized geometry of 12 from the isomer set

26

0 1

C 1.580630 -0.760652 -0.998959  
C 0.084335 -0.973271 -0.761918  
C 2.097405 -0.089211 0.297315  
H 1.774134 -0.156819 -1.883901  
H 2.076003 -1.716101 -1.160538  
C 0.843693 0.199704 1.137769  
H 2.670215 0.816172 0.101169  
H 2.755899 -0.770010 0.834799  
C -0.843693 0.199704 -1.137769  
C 0.204467 1.530295 0.737834  
C -0.204467 1.530295 -0.737834  
H 0.896837 2.348612 0.937084  
H -0.670215 1.713805 1.362476  
H 0.670215 1.713805 -1.362476  
H -0.896837 2.348612 -0.937084  
C -0.084335 -0.973271 0.761918  
H 1.070704 0.212534 2.203759  
H -0.283490 -1.889381 -1.224506  
C -1.580630 -0.760652 0.998959  
H 0.283490 -1.889381 1.224506  
C -2.097405 -0.089211 -0.297315  
H -1.774134 -0.156819 1.883901  
H -2.076003 -1.716101 1.160538  
H -2.670215 0.816172 -0.101169  
H -2.755899 -0.770010 -0.834799  
H -1.070704 0.212534 -2.203759

## Optimized geometry of 13 from the isomer set

26

0 1

C -0.302606 -1.203741 0.107513  
C 0.292120 -0.315663 -0.996069  
C 0.327567 -0.584690 1.388691  
C 1.021910 0.686180 0.874004  
H 1.035373 -1.257797 1.869465  
H -0.441591 -0.354692 2.124013  
C 2.322343 0.271185 0.185662  
C 1.812318 -0.493089 -1.063534  
H 2.213704 -0.062924 -1.979382  
H 2.092388 -1.545536 -1.053813  
H 2.952216 -0.340290 0.829084  
H 2.902877 1.146304 -0.103128  
C 0.129953 1.061362 -0.322087  
H 1.143999 1.461421 1.627438  
H -0.198094 -0.437666 -1.959308  
C -1.833251 -1.090786 0.103244  
H -0.009570 -2.245870 -0.010278  
C -2.296489 0.296180 -0.358094  
H -2.208970 -1.306364 1.104410  
H -2.261739 -1.847154 -0.555124  
C -1.324647 1.406107 0.042905  
H -3.295025 0.510145 0.021266  
H -2.381607 0.297097 -1.445021  
H -1.399319 1.594838 1.115352  
H -1.622650 2.333204 -0.444332  
H 0.582701 1.857012 -0.914060

## Optimized geometry of 14 from the isomer set

26

0 1

C -0.103393 1.250340 0.266089  
C 1.002676 1.242344 -0.831983  
C 1.837708 -0.000008 -0.500162  
C 0.256406 -0.000009 1.093180  
C -0.103412 -1.250342 0.266073  
C 1.002644 -1.242331 -0.832013  
C 1.782938 -0.000023 1.030492  
H 2.230500 -0.886998 1.478069  
H 2.230518 0.886935 1.478086  
H 2.828855 -0.000016 -0.947181  
C -1.555773 1.253972 -0.251745  
C -2.318220 0.000016 0.156073  
C -1.555800 -1.253961 -0.251735  
H -3.309914 0.000024 -0.296433  
H -2.473782 0.000022 1.236527  
H 0.582842 1.192299 -1.835840  
H 1.610668 2.144426 -0.780930  
H -2.082311 2.137213 0.107801  
H -1.557445 1.324491 -1.341001  
H 0.043391 2.125610 0.897011  
H -0.174922 -0.000012 2.091303  
H -1.557492 -1.324501 -1.340990  
H -2.082346 -2.137185 0.107838  
H 0.043380 -2.125623 0.896978  
H 1.610615 -2.144429 -0.781001  
H 0.582796 -1.192241 -1.835862

## Optimized geometry of 18 from the isomer set

26

0 1

C 1.669409 0.333662 0.389992  
C 1.291907 -0.904216 -0.426814  
C 0.423876 0.657126 1.244960  
H 1.979842 1.177905 -0.224428  
H 2.509367 0.086899 1.039107  
C -0.423876 -0.657126 1.244960  
C -1.669409 -0.333662 0.389992  
C -1.291907 0.904216 -0.426814  
H -2.509367 -0.086899 1.039107  
H -1.979842 -1.177905 -0.224428  
C -0.485485 1.700009 0.598471  
H 0.719331 0.959406 2.247120  
H 0.065713 2.531387 0.160122  
H -1.163991 2.115284 1.345637  
C 0.485485 -1.700009 0.598471  
H -0.719331 -0.959406 2.247120  
H -0.065713 -2.531387 0.160122  
H 1.163991 -2.115284 1.345637  
C 0.485485 -0.598032 -1.699251  
H 2.180280 -1.459840 -0.727232  
C -0.485485 0.598032 -1.699251  
H -0.063989 -1.502456 -1.964778  
H 1.184844 -0.432564 -2.519690  
H -1.184844 0.432564 -2.519690  
H 0.063989 1.502456 -1.964778  
H -2.180280 1.459840 -0.727232

## Optimized geometry of 19 from the isomer set

26

0 1

C 0.293529 1.250962 -0.983530  
C -0.585447 1.176074 0.288854  
C -0.093698 -0.000005 1.147506  
C 1.165592 0.000004 -1.096531  
H 0.935238 2.131974 -0.953077  
H -0.335992 1.355971 -1.867954  
C 0.293527 -1.250953 -0.983542  
C -0.585447 -1.176076 0.288845  
H 0.935234 -2.131967 -0.953098  
H -0.335995 -1.355952 -1.867966  
C -2.034335 0.774366 -0.020125  
H -0.544181 2.121032 0.828336  
C -2.034336 -0.774366 -0.020129  
H -2.377395 1.194710 -0.963649  
H -2.701125 1.151058 0.754049  
H -0.544180 -2.121039 0.828318  
H -2.377399 -1.194705 -0.963654  
H -2.701124 -1.151061 0.754044  
C 1.408550 -0.000006 1.394635  
H -0.626390 -0.000008 2.100166  
C 2.170685 -0.000002 0.053674  
H 1.676420 -0.871581 1.991821  
H 1.676420 0.871566 1.991826  
H 2.816304 -0.874534 -0.024249  
H 2.816307 0.874528 -0.024242  
H 1.696130 0.000008 -2.048600

## Optimized geometry of A from the reaction set

25

1 1

C -1.338535 0.706937 1.158939  
C -1.511044 -0.812689 1.036605  
C -0.980175 1.201718 -0.348403  
H -0.611685 1.022564 1.900285  
H -2.266730 1.230963 1.368637  
C 0.364901 0.717834 -0.334491  
C 1.678714 1.210965 0.081748  
C 2.573448 -0.047774 0.070859  
H 1.575521 1.644593 1.081952  
H 2.013006 2.040952 -0.544234  
C -1.121457 -1.081420 -0.422029  
H -2.544010 -1.101723 1.207061  
H -0.897449 -1.360308 1.745235  
C 0.372377 -0.719927 -0.575364  
C 1.589899 -1.226368 0.203169  
H 0.599088 -0.782787 -1.656305  
H 1.987359 -2.155852 -0.189970  
H 1.326353 -1.393578 1.246816  
H 3.318981 -0.029472 0.858620  
H 3.105080 -0.109497 -0.876820  
C -1.745222 0.123491 -1.143730  
H -1.172199 2.257421 -0.487923  
H -1.523534 0.157174 -2.208402  
H -2.819459 0.202379 -1.004350  
H -1.387754 -2.059424 -0.804412

## Optimized geometry of TS-AA' from the reaction set

25

1 1

C -1.598249 0.772552 1.020485  
C -1.598249 -0.772552 1.020485  
C -1.038881 1.140944 -0.391450  
H -1.009580 1.201640 1.826598  
H -2.603226 1.174352 1.105574  
C 0.386484 0.697959 -0.296827  
C 1.700365 1.231461 0.167117  
C 2.626610 0.000000 0.049923  
H 1.563384 1.533290 1.208497  
H 2.045715 2.105490 -0.376467  
C -1.038881 -1.140944 -0.391449  
H -2.603226 -1.174352 1.105574  
H -1.009580 -1.201640 1.826598  
C 0.386484 -0.697959 -0.296827  
C 1.700365 -1.231461 0.167117  
H 0.644039 0.000000 -1.390413  
H 2.045715 -2.105490 -0.376467  
H 1.563384 -1.533290 1.208497  
H 3.413160 0.000000 0.796080  
H 3.108223 0.000000 -0.926956  
C -1.641383 -0.000000 -1.232304  
H -1.217268 2.159483 -0.711167  
H -1.304929 -0.000000 -2.268685  
H -2.726543 -0.000000 -1.213720  
H -1.217268 -2.159483 -0.711167

## Optimized geometry of A' from the reaction set

25

1 1

C 1.511039 -0.812695 1.036603  
C 1.338533 0.706932 1.158942  
C 1.121458 -1.081418 -0.422033  
H 0.897441 -1.360316 1.745228  
H 2.544003 -1.101732 1.207062  
C -0.372377 -0.719925 -0.575370  
C -1.589896 -1.226369 0.203164  
C -2.573447 -0.047775 0.070865  
H -1.326345 -1.393587 1.246808  
H -1.987358 -2.155851 -0.189978  
C 0.980176 1.201719 -0.348395  
H 2.266730 1.230953 1.368643  
H 0.611686 1.022558 1.900292  
C -0.364901 0.717835 -0.334493  
C -1.678715 1.210966 0.081745  
H -0.599085 -0.782785 -1.656312  
H -2.013009 2.040944 -0.544247  
H -1.575523 1.644607 1.081943  
H -3.318969 -0.029475 0.858637  
H -3.105093 -0.109498 -0.876805  
C 1.745224 0.123498 -1.143727  
H 1.387755 -2.059420 -0.804422  
H 1.523539 0.157186 -2.208399  
H 2.819461 0.202384 -1.004344  
H 1.172198 2.257423 -0.487911



## Optimized geometry of F from the reaction set

25

1 1

C 1.960363 0.007929 -0.589094  
C 1.610613 0.378724 1.105373  
C 0.387849 -0.473322 1.359351  
H 1.537044 1.411104 1.447214  
C -0.149780 -0.698384 -0.065234  
H -0.323257 0.028430 2.006885  
C -0.256888 0.712220 -0.667856  
C 1.158415 1.148224 -0.579883  
H 1.539872 2.157567 -0.632168  
C 1.092602 -1.226882 -0.782452  
H 3.024347 0.037118 -0.768092  
H 1.533254 -2.124506 -0.358921  
H 0.653435 -1.422132 1.817398  
H 2.580756 0.032349 1.450505  
H 0.927807 -1.383982 -1.848988  
C -1.572749 -1.202122 -0.146766  
C -2.422917 0.073331 0.136483  
H -1.783406 -2.001566 0.558332  
H -1.779298 -1.587079 -1.143596  
C -1.499876 1.318452 -0.041532  
H -2.834948 0.051504 1.141123  
H -3.269417 0.120299 -0.541579  
H -0.418672 0.587070 -1.747274  
H -1.280500 1.784524 0.916717  
H -1.952803 2.080275 -0.667900

## Optimized geometry of TS-FG from the reaction set

25

1 1

C 1.910296 0.390359 -0.413090  
C 1.899468 -0.288199 1.021793  
C 0.525693 -0.975814 1.074456  
H 2.067919 0.421108 1.827928  
C -0.122475 -0.596479 -0.287601  
H -0.071889 -0.658994 1.924752  
C -0.332109 0.901387 -0.169733  
C 0.944174 1.472972 -0.162063  
C 1.093171 -0.652324 -1.210759  
H 2.890642 0.679839 -0.768246  
H 1.592256 -1.615879 -1.237320  
H 0.622266 -2.056946 1.125608  
H 2.726939 -0.991381 1.035123  
H 0.881260 -0.329188 -2.230115  
C -1.519081 -1.116503 -0.560429  
C -2.420615 -0.181065 0.275737  
H -1.650554 -2.160586 -0.290953  
H -1.749139 -1.021007 -1.621756  
C -1.725193 1.209403 0.319467  
H -2.519154 -0.567254 1.286995  
H -3.423188 -0.111567 -0.133514  
H -0.138838 1.346144 -1.264909  
H -1.710085 1.638114 1.318250  
H -2.218015 1.931469 -0.326581  
H 1.179596 2.513702 0.028064

## Optimized geometry of G from the reaction set

25

1 1

C 1.930752 0.269252 -0.373962  
C 1.915118 -0.403185 1.003573  
C 0.446974 -0.808380 1.144326  
H 2.240360 0.261830 1.798446  
C -0.188657 -0.557996 -0.364960  
H -0.081542 -0.307417 1.951475  
C -0.306576 0.827207 -0.077295  
C 0.989816 1.490339 -0.254297  
H 1.236111 2.240264 0.494333  
C 1.077642 -0.699841 -1.208742  
H 2.913597 0.505050 -0.763704  
H 1.471995 -1.711560 -1.224475  
H 0.272623 -1.874597 1.263626  
H 2.562803 -1.275025 1.012512  
H 0.914584 -0.367244 -2.232440  
C -1.589319 -1.106934 -0.545250  
C -2.447352 -0.130336 0.287797  
H -1.694103 -2.140042 -0.227519  
H -1.858356 -1.059635 -1.600118  
C -1.683982 1.210968 0.232983  
H -2.515735 -0.467215 1.319851  
H -3.461291 -0.038848 -0.086234  
H -1.795348 1.874344 1.088533  
H -1.995403 1.804523 -0.639068  
H 0.923208 2.008998 -1.220263

## Optimized geometry of TS-GG' from the reaction set

25

1 1

C -0.330798 -1.967109 -0.000000  
C -1.728087 -1.339492 0.000000  
C -1.390867 0.139320 0.000000  
H -2.299484 -1.617942 0.880539  
C 0.355214 0.119508 -0.693451  
H -1.694370 0.708979 0.872186  
C 0.355214 0.119508 0.693451  
C 0.355214 -1.289952 1.201354  
H -0.156155 -1.433106 2.148960  
C 0.355214 -1.289952 -1.201354  
H -0.308564 -3.049987 -0.000000  
H -0.156155 -1.433106 -2.148960  
H -1.694370 0.708979 -0.872186  
H -2.299484 -1.617942 -0.880539  
H 1.392232 -1.609875 -1.317650  
C 0.763519 1.452232 -1.229718  
C 0.633307 2.378559 0.000000  
H 0.197972 1.781449 -2.097239  
H 1.803703 1.356136 -1.548061  
C 0.763519 1.452232 1.229718  
H -0.342635 2.859439 0.000000  
H 1.374695 3.170136 -0.000000  
H 0.197972 1.781449 2.097239  
H 1.803703 1.356136 1.548061  
H 1.392232 -1.609875 1.317650

## Optimized geometry of G' from the reaction set

25

1 1

C -1.930752 0.269252 -0.373962  
C -0.989816 1.490339 -0.254296  
C 0.306576 0.827207 -0.077295  
H -1.236111 2.240264 0.494334  
C 0.188657 -0.557996 -0.364960  
C -0.446974 -0.808380 1.144326  
C -1.915118 -0.403185 1.003573  
H -2.240360 0.261829 1.798446  
C -1.077642 -0.699840 -1.208742  
H -2.913597 0.505050 -0.763704  
H -0.914584 -0.367243 -2.232440  
H -0.923208 2.008999 -1.220262  
H -1.471995 -1.711559 -1.224476  
H -2.562803 -1.275025 1.012511  
H 0.081542 -0.307417 1.951475  
H -0.272623 -1.874598 1.263626  
C 1.683983 1.210968 0.232983  
C 2.447352 -0.130337 0.287798  
H 1.795349 1.874345 1.088532  
H 1.995403 1.804522 -0.639069  
C 1.589319 -1.106933 -0.545250  
H 2.515734 -0.467216 1.319852  
H 3.461291 -0.038849 -0.086232  
H 1.694103 -2.140042 -0.227520  
H 1.858357 -1.059634 -1.600118

## Optimized geometry of J from the reaction set

25

1 1

C 1.865536 -0.015113 -0.489552  
C 1.118851 1.321597 -0.611151  
C -0.086320 1.135908 0.310960  
H 0.812372 1.527371 -1.633330  
C 0.318038 -0.346990 1.143637  
C -0.196191 -0.989581 0.008426  
C 0.877097 -1.078457 -1.005648  
H 0.526402 -0.960225 -2.027811  
C 1.828575 -0.292076 1.015207  
H 2.841870 -0.045758 -0.958373  
H 2.277261 0.493763 1.615943  
H 1.745166 2.144584 -0.277719  
H 2.282598 -1.243664 1.287406  
H 1.321454 -2.077590 -0.916103  
H -0.195461 -0.375588 2.093293  
C -1.499140 1.233888 -0.263751  
H -0.008226 1.736045 1.213473  
C -2.360494 0.064420 0.203604  
H -1.451886 1.232169 -1.352428  
H -1.944236 2.181416 0.031188  
C -1.629120 -1.238203 -0.199080  
H -3.351870 0.089124 -0.238839  
H -2.491978 0.095389 1.283592  
H -1.827952 -1.506444 -1.233252  
H -1.956511 -2.062955 0.437047

## Optimized geometry of TS-JK from the reaction set

25

1 1

C -1.826432 -0.080200 -0.470828  
C -0.797928 -1.093743 -1.024778  
C 0.270100 -1.238645 0.111573  
H -0.358886 -0.756356 -1.963360  
C -0.219854 -0.138810 1.094149  
C 0.017475 1.074608 0.218684  
C -1.236132 1.353758 -0.564856  
H -1.031525 1.699239 -1.574267  
C -1.735137 -0.310229 1.040102  
H -2.812340 -0.146465 -0.917216  
H -2.040971 -1.305631 1.349800  
H -1.273157 -2.048760 -1.227520  
H -2.285311 0.424164 1.623325  
H -1.902314 2.055890 -0.069516  
H 0.266962 -0.138872 2.063274  
C 1.748303 -1.071563 -0.271766  
H 0.139723 -2.198464 0.603760  
C 2.331942 0.310058 0.181966  
H 1.883645 -1.175730 -1.345913  
H 2.358212 -1.839731 0.195380  
C 1.309459 1.288374 -0.233654  
H 3.300577 0.517094 -0.259386  
H 2.453963 0.296623 1.263106  
H 1.490464 2.034825 -0.999585  
H 0.640179 2.020514 0.774564

## Optimized geometry of K from the reaction set

25

1 1

C 1.515334 0.039313 0.802042  
C 0.575364 -1.137809 1.066693  
C -0.181321 -1.304009 -0.283035  
H -0.089309 -0.966154 1.911624  
C 0.494064 -0.252942 -1.185204  
C -0.009133 1.127057 -0.816979  
C 0.708904 1.333469 0.761049  
H 0.061238 1.448881 1.627890  
C 1.929258 -0.207443 -0.648702  
H 2.321813 0.144796 1.524448  
H 2.456210 -1.148522 -0.780759  
H 1.154096 -2.027427 1.297108  
H 2.528798 0.592860 -1.078234  
H 1.265994 2.253638 0.630446  
H 0.389380 -0.440503 -2.250179  
C -1.689696 -1.121559 -0.188288  
H 0.019207 -2.288388 -0.697135  
C -2.073039 0.255796 0.346324  
H -2.124569 -1.889315 0.446917  
H -2.128239 -1.254490 -1.176770  
C -1.187846 1.337435 -0.116212  
H -2.145339 0.290425 1.435760  
H -3.074501 0.553624 0.018308  
H -1.500526 2.360264 0.063709  
H 0.374404 1.954453 -1.399264



## Optimized geometry of TS-KL from the reaction set

25

1 1

C -1.385648 0.077454 -0.861832  
C -0.500265 -1.145990 -1.101255  
C 0.231562 -1.351845 0.253034  
H 0.184956 -1.024822 -1.936256  
C -0.503873 -0.393129 1.215239  
C 0.025816 0.973681 1.131033  
C -0.581589 1.364277 -0.828706  
H -0.039381 1.565877 -1.748242  
C -1.901354 -0.191681 0.547384  
H -2.176060 0.196487 -1.601468  
H -2.482519 -1.107471 0.616151  
H -1.130876 -2.000584 -1.330072  
H -2.482159 0.620602 0.978573  
H -1.165477 2.238884 -0.562959  
H -0.582219 -0.723133 2.249402  
C 1.718267 -1.028656 0.174679  
H 0.099452 -2.370870 0.604362  
C 1.942065 0.373611 -0.383577  
H 2.230492 -1.759714 -0.445714  
H 2.158016 -1.102865 1.169769  
C 0.914160 1.355271 0.135801  
H 1.951407 0.381866 -1.471022  
H 2.914954 0.754667 -0.077447  
H 1.207561 2.397708 0.119556  
H -0.442996 1.735401 1.744571

## Optimized geometry of L from the reaction set

25

1 1

C -1.370027 0.017853 -0.839035  
C -0.497278 -1.197955 -1.133991  
C 0.426073 -1.391449 0.090374  
H 0.072703 -1.084897 -2.052780  
C -0.239943 -0.694452 1.268089  
C -0.082545 0.685607 1.353293  
C -0.624950 1.339114 -0.941080  
C -1.745105 -0.131274 0.615659  
H -2.266139 0.039522 -1.457167  
H -2.319698 -1.008960 0.901339  
H -1.129426 -2.075223 -1.255596  
H -2.243803 0.729618 1.057936  
H -0.441376 -1.246444 2.175463  
C 1.823637 -0.784383 -0.081243  
H 0.526473 -2.448977 0.315492  
C 1.795505 0.738129 -0.264041  
H 2.313734 -1.259900 -0.927087  
H 2.414855 -1.040347 0.796822  
C 0.463522 1.403377 0.177028  
H 1.956886 1.010395 -1.303880  
H 2.610306 1.187847 0.296929  
H -0.349837 1.205777 2.264250  
H 0.639612 2.445526 0.424900  
H -1.323993 2.161345 -0.796819  
H -0.153635 1.477308 -1.910118

## Optimized geometry of TS-LM from the reaction set

25

1 1

C -1.414997 0.370624 -0.789797  
C -0.780765 -0.960643 -1.176176  
C 0.100828 -1.346667 0.030814  
H -0.195442 -0.908033 -2.091944  
C -0.642701 -0.506191 1.272915  
C 0.469343 0.447245 1.381723  
C -0.354331 1.484930 -0.738910  
C -1.893889 0.064798 0.624461  
H -2.216054 0.664928 -1.461264  
H -2.679581 -0.686275 0.605108  
H -1.560835 -1.701691 -1.333757  
H -2.276222 0.926292 1.167968  
H -0.806925 -1.091391 2.169255  
C 1.603381 -1.043879 -0.256436  
H 0.030209 -2.401306 0.278708  
C 2.026781 0.501015 -0.346839  
H 1.855402 -1.533204 -1.192730  
H 2.221413 -1.496216 0.515954  
C 0.770210 1.092790 0.194750  
H 2.251418 0.847307 -1.349747  
H 2.901231 0.652843 0.279791  
H -0.807473 2.415508 -0.400999  
H 0.059866 1.678986 -1.724490  
H 0.610619 1.815761 1.342292  
H 1.309213 0.192364 2.016811

## Optimized geometry of TS-LN from the reaction set

25

1 1

C 1.524710 -0.358879 -0.536944  
C 1.273752 1.135428 -0.670582  
C 0.085865 1.381432 0.274510  
H 1.069411 1.456018 -1.688868  
C 0.174178 0.207327 1.322712  
C -0.896059 -0.798104 1.011287  
C 0.399699 -1.186862 -1.178548  
C 1.492767 -0.519927 0.980435  
H 2.473042 -0.662463 -0.971840  
H 2.331038 -0.007421 1.444765  
H 2.147604 1.685413 -0.327976  
H 1.509266 -1.553664 1.323713  
H 0.107687 0.544187 2.351520  
C -1.271264 1.334703 -0.457480  
H 0.181593 2.334742 0.783249  
C -1.856632 -0.039462 -0.265472  
H -1.148289 1.526674 -1.520387  
H -1.965311 2.080114 -0.076960  
C -0.907743 -1.236253 -0.391623  
H -2.883231 -0.270901 -0.531419  
H -1.465440 -2.146523 -0.566678  
H 0.730645 -2.220910 -1.257531  
H 0.206587 -0.853260 -2.196795  
H -1.358091 -1.411225 1.776880  
H -2.052147 -0.017200 0.928564

## Optimized geometry of TS-MN from the reaction set

25

1 1

C -1.399180 0.063591 -0.759697  
C -0.326922 -0.885651 -1.333509  
C 0.581383 -1.283531 -0.116021  
H 0.223537 -0.480173 -2.181151  
C -0.263119 -0.839409 1.109578  
C 0.215880 0.573230 1.547731  
C -0.879869 1.539502 -0.527280  
C -1.680980 -0.642495 0.566238  
H -2.270901 0.132475 -1.404415  
H -2.168172 -1.596222 0.374867  
H -0.833689 -1.770836 -1.707666  
H -2.315630 -0.079870 1.246803  
H -0.192312 -1.527760 1.946384  
C 1.968166 -0.538307 -0.143646  
H 0.775975 -2.351152 -0.104040  
C 1.458131 0.806015 -0.516352  
H 2.646215 -0.922659 -0.898464  
H 2.461581 -0.603308 0.821135  
C 0.376511 1.251946 0.230632  
H 1.443663 1.989573 0.241536  
H -0.528425 1.057944 2.170541  
H -1.602491 2.118821 0.038411  
H -0.695821 2.019937 -1.485151  
H 1.148328 0.528373 2.101885  
H 1.608138 1.215509 -1.506733

## Optimized geometry of M from the reaction set

25

1 1

C 1.415375 0.075739 -0.802649  
C 0.507041 1.296517 -0.953816  
C -0.345625 1.304313 0.347071  
H -0.100290 1.280203 -1.855874  
C 0.395386 0.307916 1.285817  
C -0.293641 -1.167834 1.250846  
C 0.628633 -1.297496 -1.050404  
C 1.775141 0.154874 0.670859  
H 2.255771 0.065160 -1.489420  
H 2.362003 1.055970 0.848054  
H 1.128399 2.186162 -1.010879  
H 2.340561 -0.690276 1.054142  
H 0.367512 0.595006 2.332317  
C -1.780732 0.859517 0.085269  
H -0.351674 2.290022 0.803267  
C -1.756064 -0.539607 -0.625930  
H -2.308056 1.562753 -0.552866  
H -2.337266 0.785416 1.015985  
C -0.516602 -1.166671 -0.165322  
H -1.790871 -0.452287 -1.705908  
H -2.615588 -1.121510 -0.290452  
H 0.433410 -1.880653 1.619106  
H 1.293746 -2.109696 -0.770932  
H 0.346228 -1.365289 -2.096098  
H -1.197357 -1.164581 1.849106

## Optimized geometry of N from the reaction set

25

1 1

C 1.298399 -0.132144 -0.908099  
C 0.916031 1.331535 -0.703807  
C 0.066487 1.282215 0.583564  
H 0.387754 1.778368 -1.545277  
C 0.528554 -0.024200 1.314403  
C -0.531977 -1.124404 1.207319  
C 0.110674 -0.988865 -1.343089  
C 1.743282 -0.491843 0.504594  
H 2.077803 -0.264897 -1.656610  
H 2.638994 0.069186 0.760303  
H 1.817880 1.916844 -0.546417  
H 1.961753 -1.547178 0.652307  
H 0.761244 0.161363 2.357866  
C -1.422781 1.262325 0.174312  
H 0.218760 2.158633 1.203902  
C -1.729279 0.053644 -0.567436  
H -1.729224 2.168452 -0.339337  
H -2.059337 1.171169 1.072593  
C -1.092577 -1.148769 -0.202841  
H -2.408962 0.068641 -1.413784  
H -0.097332 -2.087988 1.457499  
H 0.385685 -2.034995 -1.458085  
H -0.287710 -0.667678 -2.304648  
H -1.357038 -0.962755 1.901509  
H -1.631148 -2.044131 -0.495337

Table S1: Total energies (in Hartree) of various molecules in the isomer set obtained with CBS-QB3 and L-W1X composite methods

| <b>Molecule</b> | <b>CBS-QB3</b> | <b>L-W1X</b> |
|-----------------|----------------|--------------|
| 1               | -390.14386     | -390.76306   |
| exo-2           | -390.11972     | -390.73909   |
| endo-2          | -390.11318     | -390.73256   |
| 3               | -390.12687     | -390.74625   |
| 4               | -390.12067     | -390.73971   |
| syn-5           | -390.12223     | -390.74225   |
| anti-5          | -390.05023     | -390.66950   |
| syn-6           | -390.12096     | -390.74066   |
| anti-6          | -390.06243     | -390.68081   |
| 7               | -390.10856     | -390.72731   |
| exo-8           | -390.11639     | -390.73537   |
| endo-8          | -390.10605     | -390.72471   |
| 9               | -390.10324     | -390.72243   |
| 10              | -390.11069     | -390.72976   |
| syn-11          | -390.09825     | -390.71742   |
| anti-11         | -390.11339     | -390.73237   |
| 12              | -390.12466     | -390.74402   |
| 13              | -390.11586     | -390.73513   |
| 14              | -390.11343     | -390.73280   |
| 18              | -390.12121     | -390.74084   |
| 19              | -390.12268     | -390.74212   |



Table S2: Total energies (in Hartree) of various molecules in the reaction set obtained with CBS-QB3 and L-W1X composite methods

| <b>Molecule</b> | <b>CBS-QB3</b> | <b>L-W1X</b> |
|-----------------|----------------|--------------|
| A               | -389.21701     | -389.83715   |
| TS-AA'          | -389.20412     | -389.82468   |
| A'              | -389.21701     | -389.83715   |
| F               | -389.19984     | -389.81933   |
| TS-FG           | -389.18939     | -389.80906   |
| G               | -389.22250     | -389.84220   |
| TS-GG'          | -389.22356     | -389.84321   |
| G'              | -389.22250     | -389.84219   |
| J               | -389.22610     | -389.84589   |
| TS-JK           | -389.18723     | -389.80747   |
| K               | -389.21242     | -389.83239   |
| TS-KL           | -389.21071     | -389.83067   |
| L               | -389.21556     | -389.83563   |
| TS-LM           | -389.13873     | -389.75909   |
| TS-LN           | -389.20098     | -389.82168   |
| TS-MN           | -389.17492     | -389.79490   |
| M               | -389.22482     | -389.84484   |
| N               | -389.20585     | -389.82570   |

Table S3: Total energies (in Hartree) of various molecules in the isomer set for HWE-1(2,2)/STO-3G calculations on statevector simulator

| Molecule | Average    | Run1       | Run2       | Run3       | Run4       | Run5       | Run6       | Run7       | Run8       | Run9       | Run10      |
|----------|------------|------------|------------|------------|------------|------------|------------|------------|------------|------------|------------|
| 1        | -383.51257 | -383.51209 | -383.51288 | -383.51214 | -383.51289 | -383.51297 | -383.51278 | -383.51273 | -383.51204 | -383.51261 | -383.51262 |
| exo-2    | -383.48266 | -383.48272 | -383.48274 | -383.48280 | -383.48286 | -383.48277 | -383.48247 | -383.48210 | -383.48263 | -383.48276 | -383.48276 |
| endo-2   | -383.47542 | -383.47583 | -383.47562 | -383.47521 | -383.47454 | -383.47548 | -383.47472 | -383.47529 | -383.47598 | -383.47558 | -383.47594 |
| 3        | -383.49189 | -383.49210 | -383.49259 | -383.49256 | -383.49231 | -383.49271 | -383.49260 | -383.49248 | -383.49224 | -383.49234 | -383.48696 |
| 4        | -383.48302 | -383.47774 | -383.48274 | -383.48377 | -383.48360 | -383.48364 | -383.48363 | -383.48422 | -383.48359 | -383.48360 | -383.48370 |
| syn-5    | -383.49291 | -383.49343 | -383.49336 | -383.49308 | -383.49298 | -383.49333 | -383.49304 | -383.49052 | -383.49264 | -383.49343 | -383.49328 |
| anti-5   | -383.39367 | -383.39321 | -383.39371 | -383.39340 | -383.39396 | -383.39369 | -383.39381 | -383.39371 | -383.39398 | -383.39358 | -383.39365 |
| syn-6    | -383.48658 | -383.48761 | -383.48755 | -383.48698 | -383.48788 | -383.47885 | -383.48721 | -383.48705 | -383.48779 | -383.48704 | -383.48780 |
| anti-6   | -383.40168 | -383.40164 | -383.40194 | -383.40137 | -383.40160 | -383.40124 | -383.40209 | -383.40137 | -383.40171 | -383.40182 | -383.40201 |
| 7        | -383.46812 | -383.46837 | -383.46855 | -383.46797 | -383.46705 | -383.46608 | -383.46870 | -383.46864 | -383.46857 | -383.46832 | -383.46898 |
| exo-8    | -383.47957 | -383.47941 | -383.47938 | -383.47901 | -383.47953 | -383.47986 | -383.47990 | -383.47966 | -383.47955 | -383.47961 | -383.47976 |
| endo-8   | -383.46392 | -383.46416 | -383.46397 | -383.46426 | -383.46393 | -383.46292 | -383.46411 | -383.46386 | -383.46453 | -383.46331 | -383.46418 |
| 9        | -383.46068 | -383.45957 | -383.46074 | -383.46148 | -383.46053 | -383.46025 | -383.46114 | -383.46114 | -383.46080 | -383.46066 | -383.46046 |
| 10       | -383.47052 | -383.47051 | -383.47043 | -383.47081 | -383.47060 | -383.47044 | -383.47068 | -383.46949 | -383.47108 | -383.47066 | -383.47052 |
| syn-11   | -383.45422 | -383.45368 | -383.45450 | -383.45433 | -383.45437 | -383.45413 | -383.45429 | -383.45446 | -383.45388 | -383.45420 | -383.45435 |
| anti-11  | -383.47029 | -383.47090 | -383.46493 | -383.47082 | -383.47095 | -383.47114 | -383.47084 | -383.47060 | -383.47120 | -383.47073 | -383.47074 |
| 12       | -383.48978 | -383.49045 | -383.48998 | -383.48949 | -383.49032 | -383.48823 | -383.48989 | -383.49029 | -383.48899 | -383.48948 | -383.49068 |
| 13       | -383.47910 | -383.47904 | -383.47888 | -383.47901 | -383.47917 | -383.47907 | -383.47922 | -383.47931 | -383.47930 | -383.47900 | -383.47895 |
| 14       | -383.47795 | -383.47839 | -383.47803 | -383.47782 | -383.47567 | -383.47839 | -383.47829 | -383.47853 | -383.47807 | -383.47838 | -383.47798 |
| 18       | -383.48741 | -383.48720 | -383.48788 | -383.48697 | -383.48737 | -383.48732 | -383.48730 | -383.48775 | -383.48728 | -383.48762 | -383.48738 |
| 19       | -383.49121 | -383.49130 | -383.49123 | -383.49120 | -383.49124 | -383.49049 | -383.49103 | -383.49135 | -383.49147 | -383.49135 | -383.49145 |

Table S4: Total energies (in Hartree) of various molecules in the isomer set for HWE-2(2,2)/STO-3G calculations on statevector simulator

| Molecule | Average    | Run1       | Run2       | Run3       | Run4       | Run5       | Run6       | Run7       | Run8       | Run9       | Run10      |
|----------|------------|------------|------------|------------|------------|------------|------------|------------|------------|------------|------------|
| 1        | -383.51248 | -383.51305 | -383.51034 | -383.51299 | -383.51197 | -383.51291 | -383.51306 | -383.51290 | -383.51343 | -383.51170 | -383.51245 |
| exo-2    | -383.48186 | -383.48125 | -383.48251 | -383.48240 | -383.48162 | -383.48263 | -383.48245 | -383.48256 | -383.48206 | -383.48218 | -383.47893 |
| endo-2   | -383.47460 | -383.47249 | -383.47580 | -383.47468 | -383.47502 | -383.47474 | -383.47550 | -383.47453 | -383.47448 | -383.47528 | -383.47343 |
| 3        | -383.49205 | -383.49242 | -383.49252 | -383.49185 | -383.49250 | -383.49247 | -383.49264 | -383.49277 | -383.49260 | -383.49248 | -383.48824 |
| 4        | -383.48335 | -383.48305 | -383.48370 | -383.48386 | -383.48398 | -383.48408 | -383.48386 | -383.47959 | -383.48410 | -383.48389 | -383.48336 |
| syn-5    | -383.49268 | -383.49125 | -383.49343 | -383.49258 | -383.49332 | -383.49080 | -383.49303 | -383.49315 | -383.49317 | -383.49261 | -383.49346 |
| anti-5   | -383.39277 | -383.39395 | -383.38929 | -383.39258 | -383.39383 | -383.39359 | -383.39208 | -383.39093 | -383.39399 | -383.39388 | -383.39358 |
| syn-6    | -383.48680 | -383.48205 | -383.48741 | -383.48694 | -383.48746 | -383.48771 | -383.48729 | -383.48741 | -383.48750 | -383.48668 | -383.48756 |
| anti-6   | -383.40107 | -383.40111 | -383.40231 | -383.40147 | -383.39978 | -383.40203 | -383.40130 | -383.40124 | -383.40084 | -383.40206 | -383.39855 |
| 7        | -383.46810 | -383.46834 | -383.46818 | -383.46825 | -383.46853 | -383.46693 | -383.46788 | -383.46766 | -383.46725 | -383.46905 | -383.46895 |
| exo-8    | -383.47958 | -383.47949 | -383.47959 | -383.47965 | -383.47926 | -383.47978 | -383.47973 | -383.47975 | -383.47923 | -383.47964 | -383.47969 |
| endo-8   | -383.46356 | -383.46403 | -383.46397 | -383.46237 | -383.46132 | -383.46284 | -383.46397 | -383.46492 | -383.46429 | -383.46392 | -383.46401 |
| 9        | -383.46018 | -383.46102 | -383.45850 | -383.46006 | -383.45982 | -383.45984 | -383.46038 | -383.46030 | -383.46078 | -383.46084 | -383.46025 |
| 10       | -383.47018 | -383.47081 | -383.47085 | -383.46736 | -383.46982 | -383.47082 | -383.47087 | -383.47027 | -383.47021 | -383.47003 | -383.47075 |
| syn-11   | -383.45259 | -383.44682 | -383.45398 | -383.45436 | -383.45343 | -383.45179 | -383.45161 | -383.45446 | -383.45341 | -383.45427 | -383.45175 |
| anti-11  | -383.47048 | -383.47078 | -383.47100 | -383.47080 | -383.47085 | -383.47069 | -383.47130 | -383.46853 | -383.47009 | -383.47095 | -383.46981 |
| 12       | -383.48972 | -383.49016 | -383.48958 | -383.48962 | -383.48695 | -383.49017 | -383.49097 | -383.49047 | -383.48939 | -383.49061 | -383.48930 |
| 13       | -383.47825 | -383.47854 | -383.47963 | -383.47769 | -383.47588 | -383.47893 | -383.47940 | -383.47528 | -383.47874 | -383.47913 | -383.47930 |
| 14       | -383.47758 | -383.47811 | -383.47704 | -383.47791 | -383.47734 | -383.47828 | -383.47809 | -383.47498 | -383.47798 | -383.47813 | -383.47796 |
| 18       | -383.48669 | -383.48668 | -383.48732 | -383.48528 | -383.48762 | -383.48707 | -383.48508 | -383.48601 | -383.48808 | -383.48693 | -383.48681 |
| 19       | -383.48998 | -383.49140 | -383.49135 | -383.49081 | -383.49102 | -383.48334 | -383.48861 | -383.49089 | -383.49015 | -383.49105 | -383.49122 |

Table S5: Total energies (in Hartree) of various molecules in the isomer set for ESU2-RY(2,2)/STO-3G calculations on statevector simulator

| Molecule | Average    | Run1       | Run2       | Run3       | Run4       | Run5       | Run6       | Run7       | Run8       | Run9       | Run10      |
|----------|------------|------------|------------|------------|------------|------------|------------|------------|------------|------------|------------|
| 1        | -383.51271 | -383.51226 | -383.51282 | -383.51241 | -383.51305 | -383.51270 | -383.51160 | -383.51251 | -383.51261 | -383.51391 | -383.51322 |
| exo-2    | -383.48254 | -383.48257 | -383.48050 | -383.48279 | -383.48283 | -383.48271 | -383.48285 | -383.48285 | -383.48282 | -383.48264 | -383.48282 |
| endo-2   | -383.47530 | -383.47547 | -383.47474 | -383.47588 | -383.47606 | -383.47552 | -383.47526 | -383.47518 | -383.47561 | -383.47480 | -383.47445 |
| 3        | -383.49251 | -383.49180 | -383.49189 | -383.49278 | -383.49271 | -383.49277 | -383.49275 | -383.49252 | -383.49274 | -383.49266 | -383.49246 |
| 4        | -383.48379 | -383.48418 | -383.48378 | -383.48403 | -383.48395 | -383.48387 | -383.48329 | -383.48343 | -383.48412 | -383.48275 | -383.48450 |
| syn-5    | -383.49199 | -383.49343 | -383.49358 | -383.49351 | -383.49331 | -383.49009 | -383.49327 | -383.49349 | -383.49131 | -383.48449 | -383.49338 |
| anti-5   | -383.39366 | -383.39400 | -383.39346 | -383.39346 | -383.39356 | -383.39351 | -383.39307 | -383.39396 | -383.39370 | -383.39397 | -383.39391 |
| syn-6    | -383.48743 | -383.48778 | -383.48774 | -383.48787 | -383.48473 | -383.48764 | -383.48767 | -383.48764 | -383.48786 | -383.48774 | -383.48759 |
| anti-6   | -383.40179 | -383.40149 | -383.40238 | -383.40186 | -383.40154 | -383.40166 | -383.40216 | -383.40149 | -383.40164 | -383.40210 | -383.40159 |
| 7        | -383.46815 | -383.46867 | -383.46909 | -383.46811 | -383.46709 | -383.46855 | -383.46792 | -383.46726 | -383.46807 | -383.46870 | -383.46799 |
| exo-8    | -383.47968 | -383.48001 | -383.47994 | -383.47844 | -383.47970 | -383.47972 | -383.47982 | -383.47976 | -383.47983 | -383.47977 | -383.47983 |
| endo-8   | -383.46364 | -383.46359 | -383.46056 | -383.46464 | -383.46415 | -383.46432 | -383.46357 | -383.46337 | -383.46422 | -383.46432 | -383.46370 |
| 9        | -383.46094 | -383.46040 | -383.46034 | -383.46122 | -383.46096 | -383.46102 | -383.46109 | -383.46109 | -383.46109 | -383.46121 | -383.46097 |
| 10       | -383.47069 | -383.47029 | -383.47065 | -383.47050 | -383.47093 | -383.47087 | -383.47082 | -383.47098 | -383.47055 | -383.47078 | -383.47051 |
| syn-11   | -383.45399 | -383.45456 | -383.45389 | -383.45418 | -383.45411 | -383.45404 | -383.45430 | -383.45447 | -383.45473 | -383.45433 | -383.45128 |
| anti-11  | -383.46984 | -383.47083 | -383.46506 | -383.47114 | -383.46698 | -383.47099 | -383.47002 | -383.47101 | -383.47068 | -383.47096 | -383.47075 |
| 12       | -383.49068 | -383.49023 | -383.49049 | -383.49108 | -383.49046 | -383.49083 | -383.49120 | -383.49030 | -383.49050 | -383.49101 | -383.49068 |
| 13       | -383.47835 | -383.47935 | -383.47865 | -383.47822 | -383.47933 | -383.47826 | -383.47925 | -383.47601 | -383.47626 | -383.47869 | -383.47947 |
| 14       | -383.47838 | -383.47855 | -383.47834 | -383.47833 | -383.47823 | -383.47841 | -383.47831 | -383.47842 | -383.47846 | -383.47850 | -383.47821 |
| 18       | -383.48768 | -383.48773 | -383.48806 | -383.48736 | -383.48779 | -383.48753 | -383.48802 | -383.48763 | -383.48798 | -383.48688 | -383.48779 |
| 19       | -383.49102 | -383.49026 | -383.49129 | -383.49081 | -383.49129 | -383.49106 | -383.49105 | -383.49146 | -383.49133 | -383.49035 | -383.49132 |

Table S6: Total energies (in Hartree) of various molecules in the isomer set for ESU2-RYRZ(2,2)/STO-3G calculations on statevector simulator

| Molecule | Average    | Run1       | Run2       | Run3       | Run4       | Run5       | Run6       | Run7       | Run8       | Run9       | Run10      |
|----------|------------|------------|------------|------------|------------|------------|------------|------------|------------|------------|------------|
| 1        | -383.51272 | -383.51307 | -383.51325 | -383.51236 | -383.51266 | -383.51268 | -383.51277 | -383.51225 | -383.51315 | -383.51249 | -383.51254 |
| exo-2    | -383.48252 | -383.48290 | -383.48229 | -383.48276 | -383.48256 | -383.48277 | -383.48232 | -383.48288 | -383.48156 | -383.48276 | -383.48242 |
| endo-2   | -383.47518 | -383.47547 | -383.47567 | -383.47570 | -383.47514 | -383.47604 | -383.47521 | -383.47611 | -383.47615 | -383.47274 | -383.47361 |
| 3        | -383.49210 | -383.49237 | -383.49229 | -383.49242 | -383.49205 | -383.49230 | -383.49254 | -383.49198 | -383.49218 | -383.49037 | -383.49250 |
| 4        | -383.48319 | -383.48359 | -383.48406 | -383.48078 | -383.48391 | -383.48367 | -383.48248 | -383.48352 | -383.48364 | -383.48254 | -383.48370 |
| syn-5    | -383.49292 | -383.49326 | -383.49344 | -383.48930 | -383.49355 | -383.49337 | -383.49357 | -383.49352 | -383.49306 | -383.49322 | -383.49294 |
| anti-5   | -383.39358 | -383.39367 | -383.39265 | -383.39376 | -383.39358 | -383.39346 | -383.39409 | -383.39350 | -383.39407 | -383.39394 | -383.39305 |
| syn-6    | -383.48730 | -383.48788 | -383.48759 | -383.48539 | -383.48791 | -383.48800 | -383.48731 | -383.48786 | -383.48546 | -383.48772 | -383.48787 |
| anti-6   | -383.40167 | -383.40105 | -383.40138 | -383.40175 | -383.40208 | -383.40142 | -383.40105 | -383.40177 | -383.40226 | -383.40212 | -383.40185 |
| 7        | -383.46767 | -383.46721 | -383.46785 | -383.46742 | -383.46828 | -383.46791 | -383.46835 | -383.46685 | -383.46866 | -383.46680 | -383.46736 |
| exo-8    | -383.47931 | -383.47859 | -383.47888 | -383.47952 | -383.47931 | -383.47946 | -383.47907 | -383.47971 | -383.47928 | -383.47967 | -383.47960 |
| endo-8   | -383.46358 | -383.46434 | -383.46293 | -383.46369 | -383.46405 | -383.46423 | -383.46460 | -383.46387 | -383.46324 | -383.46320 | -383.46171 |
| 9        | -383.46089 | -383.46053 | -383.46100 | -383.46121 | -383.46089 | -383.46126 | -383.46132 | -383.46022 | -383.46081 | -383.46090 | -383.46075 |
| 10       | -383.47053 | -383.47002 | -383.47075 | -383.47098 | -383.47000 | -383.47073 | -383.46975 | -383.47053 | -383.47086 | -383.47099 | -383.47072 |
| syn-11   | -383.45419 | -383.45441 | -383.45417 | -383.45398 | -383.45409 | -383.45450 | -383.45450 | -383.45435 | -383.45438 | -383.45356 | -383.45393 |
| anti-11  | -383.47037 | -383.47081 | -383.47099 | -383.47050 | -383.47095 | -383.47070 | -383.46687 | -383.47079 | -383.47078 | -383.47063 | -383.47073 |
| 12       | -383.48983 | -383.48999 | -383.49116 | -383.48723 | -383.49045 | -383.49047 | -383.49098 | -383.48995 | -383.48875 | -383.49078 | -383.48849 |
| 13       | -383.47905 | -383.47904 | -383.47923 | -383.47926 | -383.47933 | -383.47897 | -383.47921 | -383.47901 | -383.47910 | -383.47916 | -383.47818 |
| 14       | -383.47815 | -383.47796 | -383.47847 | -383.47678 | -383.47840 | -383.47830 | -383.47846 | -383.47821 | -383.47796 | -383.47846 | -383.47846 |
| 18       | -383.48706 | -383.48572 | -383.48778 | -383.48736 | -383.48530 | -383.48786 | -383.48751 | -383.48695 | -383.48705 | -383.48710 | -383.48799 |
| 19       | -383.48987 | -383.49130 | -383.48577 | -383.49145 | -383.49067 | -383.49120 | -383.48797 | -383.49126 | -383.49043 | -383.48791 | -383.49071 |

Table S7: Total energies (in Hartree) of various molecules in the isomer set for EXCT. PRESERV.(2,2)/STO-3G calculations on statevector simulator

| Molecule | Average    | Run1       | Run2       | Run3       | Run4       | Run5       | Run6       | Run7       | Run8       | Run9       | Run10      |
|----------|------------|------------|------------|------------|------------|------------|------------|------------|------------|------------|------------|
| 1        | -383.51279 | -383.51247 | -383.51252 | -383.51183 | -383.51320 | -383.51315 | -383.51326 | -383.51293 | -383.51298 | -383.51239 | -383.51321 |
| exo-2    | -383.48273 | -383.48269 | -383.48271 | -383.48272 | -383.48283 | -383.48278 | -383.48271 | -383.48278 | -383.48266 | -383.48268 | -383.48270 |
| endo-2   | -383.47575 | -383.47577 | -383.47536 | -383.47582 | -383.47636 | -383.47584 | -383.47570 | -383.47613 | -383.47556 | -383.47499 | -383.47594 |
| 3        | -383.49253 | -383.49263 | -383.49241 | -383.49233 | -383.49253 | -383.49268 | -383.49247 | -383.49249 | -383.49252 | -383.49270 | -383.49258 |
| 4        | -383.48392 | -383.48440 | -383.48398 | -383.48358 | -383.48410 | -383.48366 | -383.48362 | -383.48381 | -383.48443 | -383.48418 | -383.48341 |
| syn-5    | -383.49351 | -383.49353 | -383.49361 | -383.49350 | -383.49351 | -383.49347 | -383.49350 | -383.49347 | -383.49344 | -383.49351 | -383.49356 |
| anti-5   | -383.39376 | -383.39311 | -383.39399 | -383.39401 | -383.39371 | -383.39378 | -383.39355 | -383.39383 | -383.39380 | -383.39377 | -383.39406 |
| syn-6    | -383.48779 | -383.48769 | -383.48778 | -383.48797 | -383.48756 | -383.48811 | -383.48749 | -383.48775 | -383.48803 | -383.48774 | -383.48778 |
| anti-6   | -383.40164 | -383.40212 | -383.40094 | -383.40187 | -383.40207 | -383.40109 | -383.40176 | -383.40193 | -383.40123 | -383.40169 | -383.40167 |
| 7        | -383.46813 | -383.46791 | -383.46859 | -383.46771 | -383.46773 | -383.46807 | -383.46812 | -383.46933 | -383.46779 | -383.46834 | -383.46765 |
| exo-8    | -383.47964 | -383.47965 | -383.47966 | -383.47980 | -383.47960 | -383.47959 | -383.47948 | -383.47950 | -383.47962 | -383.47971 | -383.47976 |
| endo-8   | -383.46422 | -383.46387 | -383.46491 | -383.46438 | -383.46404 | -383.46405 | -383.46368 | -383.46360 | -383.46462 | -383.46437 | -383.46467 |
| 9        | -383.46075 | -383.46105 | -383.46031 | -383.46097 | -383.46052 | -383.46063 | -383.46126 | -383.46067 | -383.46010 | -383.46090 | -383.46106 |
| 10       | -383.47071 | -383.47064 | -383.47068 | -383.47077 | -383.47043 | -383.47076 | -383.47038 | -383.47090 | -383.47081 | -383.47064 | -383.47107 |
| syn-11   | -383.45443 | -383.45435 | -383.45466 | -383.45424 | -383.45423 | -383.45444 | -383.45442 | -383.45440 | -383.45453 | -383.45449 | -383.45451 |
| anti-11  | -383.47093 | -383.47080 | -383.47097 | -383.47112 | -383.47094 | -383.47088 | -383.47086 | -383.47110 | -383.47102 | -383.47069 | -383.47091 |
| 12       | -383.49041 | -383.49034 | -383.49099 | -383.49001 | -383.49003 | -383.49060 | -383.49048 | -383.49065 | -383.49049 | -383.49053 | -383.49002 |
| 13       | -383.47913 | -383.47918 | -383.47907 | -383.47903 | -383.47910 | -383.47908 | -383.47910 | -383.47877 | -383.47933 | -383.47922 | -383.47937 |
| 14       | -383.47845 | -383.47855 | -383.47848 | -383.47835 | -383.47840 | -383.47845 | -383.47842 | -383.47830 | -383.47853 | -383.47852 | -383.47847 |
| 18       | -383.48745 | -383.48753 | -383.48769 | -383.48756 | -383.48787 | -383.48758 | -383.48688 | -383.48723 | -383.48717 | -383.48758 | -383.48743 |
| 19       | -383.49132 | -383.49103 | -383.49149 | -383.49134 | -383.49122 | -383.49145 | -383.49115 | -383.49142 | -383.49137 | -383.49133 | -383.49144 |

Table S8: Total energies (in Hartree) of various molecules in the reaction set for HWE-1(2,2)/STO-3G calculations on statevector simulator

| Molecule | Average    | Run1       | Run2       | Run3       | Run4       | Run5       | Run6       | Run7       | Run8       | Run9       | Run10      |
|----------|------------|------------|------------|------------|------------|------------|------------|------------|------------|------------|------------|
| A        | -382.65879 | -382.65928 | -382.65925 | -382.65908 | -382.65914 | -382.65888 | -382.65915 | -382.65920 | -382.65842 | -382.65903 | -382.65641 |
| TS-AA'   | -382.62634 | -382.62719 | -382.62650 | -382.62586 | -382.62576 | -382.62685 | -382.62618 | -382.62594 | -382.62641 | -382.62657 | -382.62614 |
| A'       | -382.65870 | -382.65845 | -382.65912 | -382.65933 | -382.65918 | -382.65923 | -382.65919 | -382.65889 | -382.65510 | -382.65921 | -382.65924 |
| F        | -382.61873 | -382.61394 | -382.62001 | -382.61924 | -382.61982 | -382.61999 | -382.61712 | -382.61970 | -382.61759 | -382.61999 | -382.61985 |
| TS-FG    | -382.61259 | -382.61291 | -382.61160 | -382.61290 | -382.61232 | -382.61292 | -382.61292 | -382.61290 | -382.61177 | -382.61290 | -382.61272 |
| G        | -382.66135 | -382.66279 | -382.66289 | -382.66181 | -382.66090 | -382.66131 | -382.66059 | -382.65792 | -382.66069 | -382.66245 | -382.66217 |
| TS-GG'   | -382.65120 | -382.65360 | -382.64963 | -382.65263 | -382.65096 | -382.65194 | -382.65167 | -382.64954 | -382.65029 | -382.65130 | -382.65042 |
| G'       | -382.66028 | -382.66071 | -382.66135 | -382.66265 | -382.66117 | -382.65948 | -382.65153 | -382.66138 | -382.66091 | -382.66219 | -382.66142 |
| J        | -382.66161 | -382.66070 | -382.66259 | -382.66145 | -382.65909 | -382.66359 | -382.66192 | -382.66167 | -382.66342 | -382.66138 | -382.66030 |
| TS-JK    | -382.60643 | -382.60703 | -382.60597 | -382.60706 | -382.60607 | -382.60566 | -382.60722 | -382.60713 | -382.60419 | -382.60690 | -382.60709 |
| K        | -382.63987 | -382.63760 | -382.64049 | -382.63880 | -382.64043 | -382.64066 | -382.63851 | -382.64063 | -382.64024 | -382.64068 | -382.64068 |
| TS-KL    | -382.63812 | -382.63807 | -382.63816 | -382.63850 | -382.63807 | -382.63787 | -382.63833 | -382.63805 | -382.63792 | -382.63818 | -382.63809 |
| L        | -382.64958 | -382.65000 | -382.64998 | -382.65000 | -382.65000 | -382.64997 | -382.64999 | -382.64987 | -382.64990 | -382.64795 | -382.64814 |
| TS-LM    | -382.54199 | -382.54235 | -382.54195 | -382.54217 | -382.54209 | -382.54136 | -382.54140 | -382.54200 | -382.54233 | -382.54208 | -382.54214 |
| TS-LN    | -382.62252 | -382.62224 | -382.62224 | -382.62318 | -382.61912 | -382.62301 | -382.62284 | -382.62279 | -382.62322 | -382.62330 | -382.62328 |
| TS-MN    | -382.58595 | -382.58598 | -382.58597 | -382.58402 | -382.58643 | -382.58659 | -382.58652 | -382.58627 | -382.58632 | -382.58614 | -382.58524 |
| M        | -382.66688 | -382.66747 | -382.66717 | -382.66392 | -382.66729 | -382.66701 | -382.66690 | -382.66723 | -382.66736 | -382.66745 | -382.66702 |
| N        | -382.64426 | -382.64470 | -382.64484 | -382.64445 | -382.64533 | -382.64491 | -382.64491 | -382.64063 | -382.64353 | -382.64399 | -382.64535 |

Table S9: Total energies (in Hartree) of various molecules in the reaction set for HWE-2(2,2)/STO-3G calculations on statevector simulator

| Molecule | Average    | Run1       | Run2       | Run3       | Run4       | Run5       | Run6       | Run7       | Run8       | Run9       | Run10      |
|----------|------------|------------|------------|------------|------------|------------|------------|------------|------------|------------|------------|
| A        | -382.65855 | -382.65910 | -382.65889 | -382.65840 | -382.65854 | -382.65824 | -382.65731 | -382.65875 | -382.65882 | -382.65914 | -382.65833 |
| TS-AA'   | -382.62594 | -382.62547 | -382.62648 | -382.62575 | -382.62661 | -382.62641 | -382.62563 | -382.62537 | -382.62639 | -382.62584 | -382.62548 |
| A'       | -382.65823 | -382.65561 | -382.65888 | -382.65911 | -382.65913 | -382.65735 | -382.65871 | -382.65874 | -382.65884 | -382.65775 | -382.65819 |
| F        | -382.61812 | -382.61987 | -382.61188 | -382.61911 | -382.61994 | -382.61928 | -382.61890 | -382.61988 | -382.61433 | -382.61922 | -382.61880 |
| TS-FG    | -382.61149 | -382.61236 | -382.61229 | -382.61238 | -382.61171 | -382.61266 | -382.61227 | -382.61278 | -382.61217 | -382.61260 | -382.60370 |
| G        | -382.66169 | -382.66111 | -382.66333 | -382.66139 | -382.66224 | -382.66178 | -382.66222 | -382.66277 | -382.65923 | -382.66162 | -382.66125 |
| TS-GG'   | -382.65175 | -382.65214 | -382.65100 | -382.65146 | -382.65293 | -382.65143 | -382.65236 | -382.65229 | -382.64745 | -382.65295 | -382.65353 |
| G'       | -382.66150 | -382.66143 | -382.66224 | -382.66067 | -382.66108 | -382.66223 | -382.66254 | -382.66044 | -382.66172 | -382.66172 | -382.66094 |
| J        | -382.66089 | -382.66283 | -382.66016 | -382.66306 | -382.66168 | -382.65939 | -382.66058 | -382.66225 | -382.65437 | -382.66216 | -382.66239 |
| TS-JK    | -382.60547 | -382.60566 | -382.60569 | -382.60690 | -382.60680 | -382.60660 | -382.60663 | -382.60618 | -382.60397 | -382.59914 | -382.60714 |
| K        | -382.64000 | -382.63801 | -382.64030 | -382.64015 | -382.64056 | -382.64016 | -382.64030 | -382.63943 | -382.64039 | -382.64051 | -382.64020 |
| TS-KL    | -382.63783 | -382.63826 | -382.63793 | -382.63798 | -382.63794 | -382.63819 | -382.63791 | -382.63820 | -382.63715 | -382.63778 | -382.63698 |
| L        | -382.64918 | -382.64996 | -382.64986 | -382.64964 | -382.64958 | -382.64971 | -382.64906 | -382.64830 | -382.64609 | -382.64986 | -382.64977 |
| TS-LM    | -382.54144 | -382.54188 | -382.54181 | -382.54042 | -382.54237 | -382.54176 | -382.53861 | -382.54218 | -382.54126 | -382.54249 | -382.54158 |
| TS-LN    | -382.62199 | -382.62319 | -382.62272 | -382.62286 | -382.62330 | -382.62278 | -382.62286 | -382.62301 | -382.62115 | -382.61791 | -382.62015 |
| TS-MN    | -382.58424 | -382.57949 | -382.58103 | -382.58406 | -382.58568 | -382.58610 | -382.58624 | -382.58658 | -382.58446 | -382.58322 | -382.58554 |
| M        | -382.66712 | -382.66686 | -382.66699 | -382.66738 | -382.66728 | -382.66705 | -382.66643 | -382.66710 | -382.66742 | -382.66730 | -382.66740 |
| N        | -382.64461 | -382.64334 | -382.64518 | -382.64476 | -382.64528 | -382.64420 | -382.64432 | -382.64486 | -382.64418 | -382.64497 | -382.64505 |



Table S10: Total energies (in Hartree) of various molecules in the reaction set for ESU2-RY(2,2)/STO-3G calculations on statevector simulator

| Molecule | Average    | Run1       | Run2       | Run3       | Run4       | Run5       | Run6       | Run7       | Run8       | Run9       | Run10      |
|----------|------------|------------|------------|------------|------------|------------|------------|------------|------------|------------|------------|
| A        | -382.65908 | -382.65923 | -382.65922 | -382.65889 | -382.65832 | -382.65943 | -382.65918 | -382.65918 | -382.65919 | -382.65917 | -382.65903 |
| TS-AA'   | -382.62633 | -382.62623 | -382.62655 | -382.62669 | -382.62649 | -382.62671 | -382.62668 | -382.62515 | -382.62686 | -382.62747 | -382.62444 |
| A'       | -382.65798 | -382.65907 | -382.65143 | -382.65906 | -382.65577 | -382.65929 | -382.65926 | -382.65873 | -382.65895 | -382.65909 | -382.65918 |
| F        | -382.61975 | -382.61956 | -382.61950 | -382.61991 | -382.61996 | -382.61998 | -382.61987 | -382.62000 | -382.61873 | -382.62014 | -382.61980 |
| TS-FG    | -382.61282 | -382.61292 | -382.61298 | -382.61268 | -382.61266 | -382.61270 | -382.61283 | -382.61288 | -382.61270 | -382.61293 | -382.61294 |
| G        | -382.66049 | -382.66019 | -382.66146 | -382.66292 | -382.66161 | -382.66228 | -382.65438 | -382.66307 | -382.66261 | -382.65483 | -382.66156 |
| TS-GG'   | -382.65245 | -382.65250 | -382.65139 | -382.65402 | -382.65187 | -382.65395 | -382.65305 | -382.65329 | -382.65102 | -382.65179 | -382.65158 |
| G'       | -382.66213 | -382.66257 | -382.66194 | -382.66163 | -382.66249 | -382.66203 | -382.66130 | -382.66187 | -382.66153 | -382.66275 | -382.66319 |
| J        | -382.66185 | -382.66320 | -382.66305 | -382.66271 | -382.65906 | -382.66252 | -382.66130 | -382.66335 | -382.66362 | -382.66213 | -382.65761 |
| TS-JK    | -382.60594 | -382.60735 | -382.60700 | -382.60679 | -382.60708 | -382.59715 | -382.60604 | -382.60725 | -382.60710 | -382.60733 | -382.60636 |
| K        | -382.63941 | -382.64063 | -382.64068 | -382.63059 | -382.64060 | -382.64065 | -382.63831 | -382.64064 | -382.64072 | -382.64058 | -382.64066 |
| TS-KL    | -382.63760 | -382.63847 | -382.63806 | -382.63828 | -382.63705 | -382.63826 | -382.63809 | -382.63810 | -382.63810 | -382.63354 | -382.63806 |
| L        | -382.64974 | -382.64990 | -382.65004 | -382.65003 | -382.64998 | -382.65007 | -382.64923 | -382.64985 | -382.64996 | -382.64988 | -382.64842 |
| TS-LM    | -382.54224 | -382.54211 | -382.54257 | -382.54165 | -382.54298 | -382.54248 | -382.54254 | -382.54172 | -382.54230 | -382.54175 | -382.54227 |
| TS-LN    | -382.62279 | -382.62317 | -382.62332 | -382.62311 | -382.62328 | -382.62333 | -382.62309 | -382.62335 | -382.62326 | -382.61919 | -382.62284 |
| TS-MN    | -382.58624 | -382.58640 | -382.58631 | -382.58650 | -382.58638 | -382.58672 | -382.58587 | -382.58633 | -382.58660 | -382.58435 | -382.58695 |
| M        | -382.66705 | -382.66742 | -382.66565 | -382.66712 | -382.66682 | -382.66747 | -382.66697 | -382.66724 | -382.66720 | -382.66731 | -382.66726 |
| N        | -382.64427 | -382.64530 | -382.64517 | -382.64497 | -382.64463 | -382.64504 | -382.64511 | -382.64529 | -382.64249 | -382.63959 | -382.64507 |

Table S11: Total energies (in Hartree) of various molecules in the reaction set for ESU2-RYRZ(2,2)/STO-3G calculations on statevector simulator

| Molecule | Average    | Run1       | Run2       | Run3       | Run4       | Run5       | Run6       | Run7       | Run8       | Run9       | Run10      |
|----------|------------|------------|------------|------------|------------|------------|------------|------------|------------|------------|------------|
| A        | -382.65856 | -382.65889 | -382.65764 | -382.65920 | -382.65879 | -382.65922 | -382.65900 | -382.65639 | -382.65846 | -382.65870 | -382.65926 |
| TS-AA'   | -382.62542 | -382.62576 | -382.62600 | -382.62603 | -382.62549 | -382.62498 | -382.62650 | -382.62526 | -382.62587 | -382.62572 | -382.62257 |
| A'       | -382.65891 | -382.65909 | -382.65930 | -382.65894 | -382.65873 | -382.65921 | -382.65925 | -382.65910 | -382.65910 | -382.65890 | -382.65744 |
| F        | -382.61885 | -382.61963 | -382.61995 | -382.61598 | -382.61659 | -382.61997 | -382.61993 | -382.61907 | -382.61990 | -382.61762 | -382.61982 |
| TS-FG    | -382.61260 | -382.61296 | -382.61284 | -382.61243 | -382.61275 | -382.61199 | -382.61273 | -382.61275 | -382.61289 | -382.61183 | -382.61282 |
| G        | -382.66050 | -382.66054 | -382.66207 | -382.65904 | -382.66088 | -382.66079 | -382.66048 | -382.66188 | -382.65755 | -382.66142 | -382.66033 |
| TS-GG'   | -382.65005 | -382.65015 | -382.65051 | -382.65011 | -382.65088 | -382.64961 | -382.64860 | -382.65014 | -382.65110 | -382.65067 | -382.64876 |
| G'       | -382.66058 | -382.65794 | -382.66045 | -382.66134 | -382.66137 | -382.66120 | -382.66147 | -382.66089 | -382.65791 | -382.66088 | -382.66235 |
| J        | -382.66044 | -382.65922 | -382.66217 | -382.65130 | -382.66134 | -382.66091 | -382.65880 | -382.66212 | -382.66365 | -382.66098 | -382.66389 |
| TS-JK    | -382.60687 | -382.60717 | -382.60716 | -382.60740 | -382.60718 | -382.60688 | -382.60606 | -382.60710 | -382.60578 | -382.60687 | -382.60713 |
| K        | -382.64023 | -382.64066 | -382.64060 | -382.63995 | -382.63880 | -382.64066 | -382.64030 | -382.64047 | -382.64067 | -382.64066 | -382.63949 |
| TS-KL    | -382.63761 | -382.63828 | -382.63838 | -382.63832 | -382.63780 | -382.63562 | -382.63761 | -382.63724 | -382.63663 | -382.63808 | -382.63814 |
| L        | -382.64972 | -382.64964 | -382.64996 | -382.64971 | -382.65000 | -382.64952 | -382.64995 | -382.65000 | -382.65001 | -382.64983 | -382.64861 |
| TS-LM    | -382.54055 | -382.54158 | -382.54111 | -382.54203 | -382.54141 | -382.54170 | -382.54202 | -382.53948 | -382.53237 | -382.54206 | -382.54173 |
| TS-LN    | -382.62208 | -382.61485 | -382.62312 | -382.62121 | -382.62325 | -382.62290 | -382.62253 | -382.62314 | -382.62319 | -382.62324 | -382.62333 |
| TS-MN    | -382.58549 | -382.58640 | -382.58656 | -382.58531 | -382.58475 | -382.58549 | -382.58331 | -382.58601 | -382.58625 | -382.58498 | -382.58584 |
| M        | -382.66581 | -382.66642 | -382.66703 | -382.66714 | -382.65797 | -382.66592 | -382.66704 | -382.66678 | -382.66588 | -382.66736 | -382.66652 |
| N        | -382.64379 | -382.64255 | -382.64450 | -382.64312 | -382.64360 | -382.64533 | -382.64501 | -382.64523 | -382.64504 | -382.63861 | -382.64493 |

Table S12: Total energies (in Hartree) of various molecules in the reaction set for EXCT. PRESERV.(2,2)/STO-3G calculations on statevector simulator

| Molecule | Average    | Run1       | Run2       | Run3       | Run4       | Run5       | Run6       | Run7       | Run8       | Run9       | Run10      |
|----------|------------|------------|------------|------------|------------|------------|------------|------------|------------|------------|------------|
| A        | -382.65921 | -382.65923 | -382.65929 | -382.65917 | -382.65915 | -382.65917 | -382.65920 | -382.65919 | -382.65930 | -382.65937 | -382.65905 |
| TS-AA'   | -382.62629 | -382.62709 | -382.62577 | -382.62671 | -382.62641 | -382.62652 | -382.62671 | -382.62571 | -382.62591 | -382.62643 | -382.62565 |
| A'       | -382.65915 | -382.65928 | -382.65908 | -382.65919 | -382.65929 | -382.65894 | -382.65902 | -382.65928 | -382.65910 | -382.65901 | -382.65927 |
| F        | -382.61999 | -382.61999 | -382.62005 | -382.61996 | -382.62006 | -382.61997 | -382.61992 | -382.61990 | -382.62004 | -382.62005 | -382.62000 |
| TS-FG    | -382.61290 | -382.61288 | -382.61291 | -382.61288 | -382.61291 | -382.61293 | -382.61284 | -382.61291 | -382.61288 | -382.61287 | -382.61296 |
| G        | -382.66174 | -382.66209 | -382.66082 | -382.66331 | -382.66232 | -382.66091 | -382.66209 | -382.66076 | -382.66178 | -382.66142 | -382.66192 |
| TS-GG'   | -382.65037 | -382.65232 | -382.65150 | -382.65017 | -382.64786 | -382.64869 | -382.65032 | -382.65066 | -382.64821 | -382.65071 | -382.65322 |
| G'       | -382.66121 | -382.66115 | -382.66098 | -382.66182 | -382.66208 | -382.66173 | -382.66095 | -382.66095 | -382.66081 | -382.66101 | -382.66059 |
| J        | -382.66163 | -382.66204 | -382.66239 | -382.66240 | -382.66267 | -382.65918 | -382.65889 | -382.66294 | -382.66237 | -382.66218 | -382.66123 |
| TS-JK    | -382.60710 | -382.60706 | -382.60708 | -382.60703 | -382.60711 | -382.60700 | -382.60744 | -382.60702 | -382.60702 | -382.60706 | -382.60718 |
| K        | -382.64066 | -382.64066 | -382.64066 | -382.64066 | -382.64067 | -382.64068 | -382.64067 | -382.64064 | -382.64066 | -382.64065 | -382.64068 |
| TS-KL    | -382.63820 | -382.63816 | -382.63822 | -382.63819 | -382.63853 | -382.63811 | -382.63834 | -382.63808 | -382.63807 | -382.63811 | -382.63822 |
| L        | -382.65000 | -382.64999 | -382.65002 | -382.64998 | -382.65005 | -382.65002 | -382.64995 | -382.65000 | -382.65001 | -382.64998 | -382.64999 |
| TS-LM    | -382.54203 | -382.54216 | -382.54187 | -382.54222 | -382.54209 | -382.54164 | -382.54185 | -382.54253 | -382.54153 | -382.54213 | -382.54228 |
| TS-LN    | -382.62330 | -382.62328 | -382.62332 | -382.62328 | -382.62333 | -382.62327 | -382.62327 | -382.62326 | -382.62332 | -382.62336 | -382.62326 |
| TS-MN    | -382.58636 | -382.58634 | -382.58667 | -382.58665 | -382.58596 | -382.58602 | -382.58642 | -382.58608 | -382.58649 | -382.58684 | -382.58617 |
| M        | -382.66722 | -382.66725 | -382.66702 | -382.66741 | -382.66731 | -382.66694 | -382.66731 | -382.66732 | -382.66729 | -382.66713 | -382.66718 |
| N        | -382.64514 | -382.64562 | -382.64521 | -382.64515 | -382.64483 | -382.64517 | -382.64491 | -382.64517 | -382.64550 | -382.64473 | -382.64511 |

Table S13: Total energies (in Hartree) of various molecules in the isomer set for HWE-1(4,4)/STO-3G calculations on statevector simulator

| Molecule | Average    | Run1       | Run2       | Run3       | Run4       | Run5       |
|----------|------------|------------|------------|------------|------------|------------|
| 1        | -383.51238 | -383.51287 | -383.51202 | -383.51238 | -383.51233 | -383.51229 |
| exo-2    | -383.48167 | -383.48364 | -383.48271 | -383.47566 | -383.48252 | -383.48381 |
| endo-2   | -383.47580 | -383.47480 | -383.47551 | -383.47615 | -383.47682 | -383.47574 |
| 3        | -383.49251 | -383.49229 | -383.49244 | -383.49261 | -383.49263 | -383.49258 |
| 4        | -383.48340 | -383.48376 | -383.48261 | -383.48315 | -383.48394 | -383.48352 |
| syn-5    | -383.49275 | -383.49185 | -383.49358 | -383.49176 | -383.49308 | -383.49348 |
| anti-5   | -383.39274 | -383.39326 | -383.39365 | -383.39387 | -383.39216 | -383.39077 |
| syn-6    | -383.48737 | -383.48786 | -383.48753 | -383.48676 | -383.48728 | -383.48743 |
| anti-6   | -383.40157 | -383.40254 | -383.40217 | -383.40142 | -383.40032 | -383.40139 |
| 7        | -383.46777 | -383.46810 | -383.46770 | -383.46783 | -383.46786 | -383.46738 |
| exo-8    | -383.47956 | -383.47961 | -383.47963 | -383.47927 | -383.47988 | -383.47941 |
| endo-8   | -383.46387 | -383.46415 | -383.46369 | -383.46336 | -383.46360 | -383.46455 |
| 9        | -383.46079 | -383.46040 | -383.46090 | -383.46093 | -383.46081 | -383.46090 |
| 10       | -383.47019 | -383.46927 | -383.46948 | -383.47081 | -383.47061 | -383.47079 |
| syn-11   | -383.45473 | -383.45448 | -383.45549 | -383.45433 | -383.45437 | -383.45497 |
| anti-11  | -383.47089 | -383.47083 | -383.47134 | -383.47062 | -383.47086 | -383.47079 |
| 12       | -383.49020 | -383.49106 | -383.49005 | -383.49027 | -383.48908 | -383.49055 |
| 13       | -383.47893 | -383.47925 | -383.47876 | -383.47879 | -383.47794 | -383.47991 |
| 14       | -383.47802 | -383.47830 | -383.47812 | -383.47677 | -383.47839 | -383.47851 |
| 18       | -383.48538 | -383.48747 | -383.48761 | -383.48737 | -383.47682 | -383.48764 |
| 19       | -383.49141 | -383.49170 | -383.49159 | -383.49125 | -383.49126 | -383.49125 |

Table S14: Total energies (in Hartree) of various molecules in the isomer set for HWE-2(4,4)/STO-3G calculations on statevector simulator

| Molecule | Average    | Run1       | Run2       | Run3       | Run4       | Run5       |
|----------|------------|------------|------------|------------|------------|------------|
| 1        | -383.51027 | -383.51213 | -383.51134 | -383.50550 | -383.50942 | -383.51296 |
| exo-2    | -383.48069 | -383.48204 | -383.48122 | -383.47927 | -383.48005 | -383.48086 |
| endo-2   | -383.47365 | -383.47549 | -383.47113 | -383.47359 | -383.47490 | -383.47316 |
| 3        | -383.49062 | -383.49100 | -383.48969 | -383.49254 | -383.48903 | -383.49085 |
| 4        | -383.48203 | -383.48342 | -383.47958 | -383.48276 | -383.48196 | -383.48243 |
| syn-5    | -383.49042 | -383.48443 | -383.49069 | -383.49315 | -383.49085 | -383.49299 |
| anti-5   | -383.39318 | -383.39206 | -383.39253 | -383.39399 | -383.39419 | -383.39313 |
| syn-6    | -383.48524 | -383.48574 | -383.48429 | -383.48686 | -383.48229 | -383.48703 |
| anti-6   | -383.40103 | -383.40174 | -383.40035 | -383.40074 | -383.40155 | -383.40076 |
| 7        | -383.46617 | -383.46619 | -383.46715 | -383.46453 | -383.46607 | -383.46691 |
| exo-8    | -383.47876 | -383.47903 | -383.47781 | -383.47937 | -383.47917 | -383.47843 |
| endo-8   | -383.46197 | -383.45927 | -383.46260 | -383.46200 | -383.46381 | -383.46216 |
| 9        | -383.45804 | -383.46028 | -383.45855 | -383.45043 | -383.46071 | -383.46022 |
| 10       | -383.46924 | -383.47018 | -383.46907 | -383.46944 | -383.46952 | -383.46798 |
| syn-11   | -383.45178 | -383.45273 | -383.44962 | -383.45264 | -383.45249 | -383.45141 |
| anti-11  | -383.46927 | -383.47111 | -383.47029 | -383.47073 | -383.46577 | -383.46844 |
| 12       | -383.48598 | -383.48833 | -383.48536 | -383.49038 | -383.48649 | -383.47936 |
| 13       | -383.47739 | -383.47531 | -383.47660 | -383.47828 | -383.47781 | -383.47896 |
| 14       | -383.47476 | -383.47793 | -383.47753 | -383.47715 | -383.46313 | -383.47804 |
| 18       | -383.48595 | -383.48696 | -383.48609 | -383.48490 | -383.48602 | -383.48580 |
| 19       | -383.49042 | -383.49123 | -383.48847 | -383.49134 | -383.49089 | -383.49016 |

Table S15: Total energies (in Hartree) of various molecules in the isomer set for ESU2-RY(4,4)/STO-3G calculations on statevector simulator

| Molecule | Average    | Run1       | Run2       | Run3       | Run4       | Run5       |
|----------|------------|------------|------------|------------|------------|------------|
| 1        | -383.5121  | -383.51169 | -383.51242 | -383.51230 | -383.51197 | -383.51212 |
| exo-2    | -383.48256 | -383.48253 | -383.48238 | -383.48256 | -383.48282 | -383.48252 |
| endo-2   | -383.47545 | -383.47562 | -383.47576 | -383.47517 | -383.47534 | -383.47536 |
| 3        | -383.49237 | -383.49231 | -383.49226 | -383.49241 | -383.49220 | -383.49265 |
| 4        | -383.48301 | -383.48305 | -383.48043 | -383.48409 | -383.48377 | -383.48371 |
| syn-5    | -383.49338 | -383.49343 | -383.49248 | -383.49414 | -383.49316 | -383.49367 |
| anti-5   | -383.39338 | -383.39216 | -383.39378 | -383.39441 | -383.39377 | -383.39278 |
| syn-6    | -383.48692 | -383.48719 | -383.48828 | -383.48793 | -383.48452 | -383.48670 |
| anti-6   | -383.40128 | -383.40177 | -383.40079 | -383.40047 | -383.40187 | -383.40152 |
| 7        | -383.46745 | -383.46740 | -383.46757 | -383.46708 | -383.46792 | -383.46730 |
| exo-8    | -383.47953 | -383.47910 | -383.48035 | -383.47952 | -383.47936 | -383.47930 |
| endo-8   | -383.46367 | -383.46446 | -383.46411 | -383.46380 | -383.46204 | -383.46394 |
| 9        | -383.46035 | -383.45993 | -383.46020 | -383.46053 | -383.46059 | -383.46052 |
| 10       | -383.47004 | -383.47031 | -383.46996 | -383.46923 | -383.47024 | -383.47046 |
| syn-11   | -383.45446 | -383.45446 | -383.45465 | -383.45388 | -383.45434 | -383.45497 |
| anti-11  | -383.47066 | -383.47134 | -383.46969 | -383.47017 | -383.47094 | -383.47117 |
| 12       | -383.48853 | -383.49019 | -383.49070 | -383.49007 | -383.49078 | -383.48089 |
| 13       | -383.47907 | -383.47906 | -383.47868 | -383.47959 | -383.47875 | -383.47929 |
| 14       | -383.47834 | -383.47815 | -383.47827 | -383.47806 | -383.47849 | -383.47875 |
| 18       | -383.48742 | -383.48748 | -383.48764 | -383.48749 | -383.48719 | -383.48732 |
| 19       | -383.49082 | -383.48983 | -383.49037 | -383.49106 | -383.49154 | -383.49129 |

Table S16: Total energies (in Hartree) of various molecules in the isomer set for ESU2-RYRZ(4,4)/STO-3G calculations on statevector simulator

| Molecule | Average    | Run1       | Run2       | Run3       | Run4       | Run5       |
|----------|------------|------------|------------|------------|------------|------------|
| 1        | -383.51245 | -383.51224 | -383.51210 | -383.51318 | -383.51251 | -383.51221 |
| exo-2    | -383.48348 | -383.48370 | -383.48287 | -383.48397 | -383.48285 | -383.48403 |
| endo-2   | -383.47524 | -383.47582 | -383.47522 | -383.47427 | -383.47505 | -383.47582 |
| 3        | -383.49221 | -383.49269 | -383.49255 | -383.49120 | -383.49231 | -383.49230 |
| 4        | -383.48351 | -383.48360 | -383.48327 | -383.48368 | -383.48345 | -383.48357 |
| syn-5    | -383.49401 | -383.49425 | -383.49386 | -383.49402 | -383.49403 | -383.49388 |
| anti-5   | -383.39400 | -383.39401 | -383.39414 | -383.39373 | -383.39453 | -383.39357 |
| syn-6    | -383.48775 | -383.48743 | -383.48763 | -383.48757 | -383.48788 | -383.48825 |
| anti-6   | -383.40120 | -383.40125 | -383.40062 | -383.40030 | -383.40164 | -383.40220 |
| 7        | -383.46646 | -383.46167 | -383.46702 | -383.46780 | -383.46788 | -383.46794 |
| exo-8    | -383.47914 | -383.47922 | -383.47925 | -383.47893 | -383.47908 | -383.47921 |
| endo-8   | -383.46371 | -383.46420 | -383.46300 | -383.46411 | -383.46431 | -383.46293 |
| 9        | -383.46063 | -383.46070 | -383.46016 | -383.46079 | -383.46054 | -383.46094 |
| 10       | -383.4707  | -383.47078 | -383.47068 | -383.47083 | -383.47007 | -383.47114 |
| syn-11   | -383.45410 | -383.45396 | -383.45448 | -383.45326 | -383.45443 | -383.45439 |
| anti-11  | -383.47088 | -383.47057 | -383.47049 | -383.47109 | -383.47097 | -383.47127 |
| 12       | -383.49013 | -383.49031 | -383.48990 | -383.49017 | -383.49032 | -383.48997 |
| 13       | -383.47932 | -383.47906 | -383.47962 | -383.47913 | -383.48021 | -383.47859 |
| 14       | -383.47748 | -383.47324 | -383.47875 | -383.47818 | -383.47871 | -383.47851 |
| 18       | -383.48703 | -383.48564 | -383.48731 | -383.48714 | -383.48769 | -383.48739 |
| 19       | -383.49137 | -383.49104 | -383.49136 | -383.49141 | -383.49151 | -383.49153 |

Table S17: Total energies (in Hartree) of various molecules in the isomer set for EXCT. PRESERV.(4,4)/STO-3G calculations on statevector simulator

| Molecule | Average    | Run1       | Run2       | Run3       | Run4       | Run5       |
|----------|------------|------------|------------|------------|------------|------------|
| 1        | -383.51275 | -383.51278 | -383.51290 | -383.51257 | -383.51289 | -383.51263 |
| exo-2    | -383.48278 | -383.48278 | -383.48302 | -383.48300 | -383.48271 | -383.48237 |
| endo-2   | -383.47535 | -383.47538 | -383.47551 | -383.47537 | -383.47564 | -383.47483 |
| 3        | -383.49235 | -383.49262 | -383.49190 | -383.49242 | -383.49225 | -383.49255 |
| 4        | -383.48368 | -383.48379 | -383.48375 | -383.48330 | -383.48384 | -383.48374 |
| syn-5    | -383.49308 | -383.49332 | -383.49327 | -383.49318 | -383.49281 | -383.49284 |
| anti-5   | -383.39337 | -383.39308 | -383.39397 | -383.39350 | -383.39324 | -383.39305 |
| syn-6    | -383.48776 | -383.48770 | -383.48744 | -383.48802 | -383.48746 | -383.48816 |
| anti-6   | -383.40115 | -383.40123 | -383.40101 | -383.40129 | -383.40163 | -383.40057 |
| 7        | -383.46767 | -383.46751 | -383.46732 | -383.46764 | -383.46798 | -383.46789 |
| exo-8    | -383.47934 | -383.47927 | -383.47960 | -383.47897 | -383.47950 | -383.47934 |
| endo-8   | -383.46399 | -383.46407 | -383.46441 | -383.46449 | -383.46350 | -383.46347 |
| 9        | -383.46080 | -383.46084 | -383.46097 | -383.46068 | -383.46063 | -383.46087 |
| 10       | -383.47041 | -383.47081 | -383.47024 | -383.47024 | -383.47046 | -383.47030 |
| syn-11   | -383.45431 | -383.45441 | -383.45406 | -383.45457 | -383.45387 | -383.45465 |
| anti-11  | -383.47101 | -383.47154 | -383.47085 | -383.47093 | -383.47074 | -383.47098 |
| 12       | -383.49065 | -383.49030 | -383.49082 | -383.49111 | -383.49064 | -383.49036 |
| 13       | -383.47924 | -383.47917 | -383.47895 | -383.47932 | -383.47948 | -383.47927 |
| 14       | -383.47828 | -383.47833 | -383.47839 | -383.47817 | -383.47828 | -383.47823 |
| 18       | -383.48738 | -383.48748 | -383.48728 | -383.48722 | -383.48772 | -383.48718 |
| 19       | -383.49135 | -383.49121 | -383.49138 | -383.49105 | -383.49184 | -383.49128 |



Table S18: Total energies (in Hartree) of various molecules in the reaction set for HWE-1(4,4)/STO-3G calculations on statevector simulator

| Molecule | Average    | Run1       | Run2       | Run3       | Run4       | Run5       |
|----------|------------|------------|------------|------------|------------|------------|
| A        | -382.65709 | -382.65926 | -382.65817 | -382.65937 | -382.65531 | -382.65332 |
| TS-AA'   | -382.62379 | -382.62558 | -382.62601 | -382.61561 | -382.62647 | -382.62526 |
| A'       | -382.65684 | -382.66007 | -382.65927 | -382.65822 | -382.64798 | -382.65864 |
| F        | -382.61939 | -382.62036 | -382.61950 | -382.61895 | -382.61858 | -382.61956 |
| TS-FG    | -382.61271 | -382.61317 | -382.61224 | -382.61171 | -382.61411 | -382.61230 |
| G        | -382.65930 | -382.66019 | -382.65998 | -382.66100 | -382.66014 | -382.65519 |
| TS-GG'   | -382.64912 | -382.64938 | -382.65028 | -382.64907 | -382.64791 | -382.64898 |
| G'       | -382.66113 | -382.66230 | -382.66148 | -382.66126 | -382.65978 | -382.66081 |
| J        | -382.65829 | -382.65613 | -382.65931 | -382.66069 | -382.66089 | -382.65442 |
| TS-JK    | -382.60663 | -382.60576 | -382.60558 | -382.60769 | -382.60747 | -382.60663 |
| K        | -382.63991 | -382.63839 | -382.64081 | -382.64075 | -382.63866 | -382.64093 |
| TS-KL    | -382.63676 | -382.63622 | -382.63771 | -382.63714 | -382.63690 | -382.63582 |
| L        | -382.64808 | -382.64909 | -382.64882 | -382.64985 | -382.64225 | -382.65039 |
| TS-LM    | -382.54175 | -382.54209 | -382.54043 | -382.54267 | -382.54133 | -382.54223 |
| TS-LN    | -382.62279 | -382.62318 | -382.62279 | -382.62204 | -382.62317 | -382.62279 |
| TS-MN    | -382.58705 | -382.58632 | -382.58626 | -382.58886 | -382.58670 | -382.58712 |
| M        | -382.66377 | -382.66825 | -382.66687 | -382.65203 | -382.66588 | -382.66584 |
| N        | -382.64438 | -382.64490 | -382.64411 | -382.64421 | -382.64359 | -382.64509 |

Table S19: Total energies (in Hartree) of various molecules in the reaction set for HWE-2(4,4)/STO-3G calculations on statevector simulator

| <b>Molecule</b> | <b>Average</b> | <b>Run1</b> | <b>Run2</b> | <b>Run3</b> | <b>Run4</b> | <b>Run5</b> |
|-----------------|----------------|-------------|-------------|-------------|-------------|-------------|
| A               | -382.65586     | -382.65867  | -382.65794  | -382.65738  | -382.65126  | -382.65406  |
| TS-AA'          | -382.62463     | -382.62687  | -382.62496  | -382.62257  | -382.62414  | -382.62462  |
| A'              | -382.65749     | -382.65703  | -382.65678  | -382.65763  | -382.65792  | -382.65809  |
| F               | -382.61912     | -382.61857  | -382.61782  | -382.61974  | -382.62013  | -382.61932  |
| TS-FG           | -382.61109     | -382.60902  | -382.61313  | -382.60855  | -382.61205  | -382.61271  |
| G               | -382.65646     | -382.65778  | -382.66078  | -382.65047  | -382.65893  | -382.65434  |
| TS-GG'          | -382.64887     | -382.64755  | -382.64525  | -382.65288  | -382.65020  | -382.64849  |
| G'              | -382.65994     | -382.65814  | -382.66035  | -382.65952  | -382.66126  | -382.66042  |
| J               | -382.65779     | -382.66092  | -382.65242  | -382.65797  | -382.65908  | -382.65855  |
| TS-JK           | -382.60282     | -382.60616  | -382.60411  | -382.60340  | -382.60508  | -382.59537  |
| K               | -382.63894     | -382.64098  | -382.63803  | -382.63771  | -382.63677  | -382.64122  |
| TS-KL           | -382.63763     | -382.63614  | -382.63847  | -382.63796  | -382.63711  | -382.63846  |
| L               | -382.64525     | -382.64555  | -382.63934  | -382.64653  | -382.64690  | -382.64793  |
| TS-LM           | -382.53893     | -382.53925  | -382.54088  | -382.54043  | -382.54156  | -382.53254  |
| TS-LN           | -382.61780     | -382.61124  | -382.61693  | -382.62011  | -382.62106  | -382.61966  |
| TS-MN           | -382.58460     | -382.58465  | -382.58417  | -382.58677  | -382.58312  | -382.58427  |
| M               | -382.66440     | -382.66718  | -382.66496  | -382.66344  | -382.66581  | -382.66063  |
| N               | -382.64384     | -382.64430  | -382.64444  | -382.64256  | -382.64356  | -382.64436  |

Table S20: Total energies (in Hartree) of various molecules in the reaction set for ESU2-RY(4,4)/STO-3G calculations on statevector simulator

| Molecule | Average    | Run1       | Run2       | Run3       | Run4       | Run5       |
|----------|------------|------------|------------|------------|------------|------------|
| A        | -382.65744 | -382.65628 | -382.65838 | -382.65958 | -382.65741 | -382.65557 |
| TS-AA'   | -382.62500 | -382.62572 | -382.62594 | -382.62616 | -382.62517 | -382.62202 |
| A'       | -382.65868 | -382.65665 | -382.65933 | -382.65882 | -382.65921 | -382.65938 |
| F        | -382.61881 | -382.61953 | -382.62039 | -382.61706 | -382.61947 | -382.61762 |
| TS-FG    | -382.61126 | -382.61229 | -382.61373 | -382.60814 | -382.60986 | -382.61230 |
| G        | -382.66092 | -382.66090 | -382.66109 | -382.66087 | -382.66138 | -382.66034 |
| TS-GG'   | -382.64803 | -382.64977 | -382.64835 | -382.64960 | -382.64530 | -382.64714 |
| G'       | -382.65991 | -382.65962 | -382.66091 | -382.65540 | -382.66264 | -382.66097 |
| J        | -382.65926 | -382.65817 | -382.65848 | -382.66010 | -382.66064 | -382.65891 |
| TS-JK    | -382.60585 | -382.60752 | -382.60498 | -382.60737 | -382.60375 | -382.60564 |
| K        | -382.64017 | -382.64062 | -382.64046 | -382.64049 | -382.63886 | -382.64040 |
| TS-KL    | -382.63811 | -382.63938 | -382.63654 | -382.63778 | -382.63897 | -382.63787 |
| L        | -382.64850 | -382.65053 | -382.65116 | -382.64516 | -382.64548 | -382.65015 |
| TS-LM    | -382.54154 | -382.54223 | -382.54136 | -382.54159 | -382.54183 | -382.54067 |
| TS-LN    | -382.62224 | -382.62297 | -382.62334 | -382.62240 | -382.61917 | -382.62333 |
| TS-MN    | -382.58511 | -382.58691 | -382.58238 | -382.58810 | -382.58593 | -382.58222 |
| M        | -382.66490 | -382.66718 | -382.65980 | -382.66607 | -382.66476 | -382.66671 |
| N        | -382.64509 | -382.64494 | -382.64709 | -382.64344 | -382.64475 | -382.64521 |

Table S21: Total energies (in Hartree) of various molecules in the reaction set for ESU2-RYRZ(4,4)/STO-3G calculations on statevector simulator

| Molecule | Average    | Run1       | Run2       | Run3       | Run4       | Run5       |
|----------|------------|------------|------------|------------|------------|------------|
| A        | -382.65857 | -382.65913 | -382.65687 | -382.65911 | -382.65782 | -382.65992 |
| TS-AA'   | -382.62536 | -382.62498 | -382.62623 | -382.62543 | -382.62486 | -382.62530 |
| A'       | -382.65889 | -382.65874 | -382.65849 | -382.65852 | -382.65956 | -382.65916 |
| F        | -382.61998 | -382.61968 | -382.62012 | -382.61989 | -382.61955 | -382.62067 |
| TS-FG    | -382.61268 | -382.61312 | -382.61138 | -382.61285 | -382.61244 | -382.61362 |
| G        | -382.65952 | -382.66082 | -382.65902 | -382.66069 | -382.66048 | -382.65658 |
| TS-GG'   | -382.64871 | -382.64853 | -382.64983 | -382.64958 | -382.64946 | -382.64617 |
| G'       | -382.66028 | -382.66087 | -382.65920 | -382.66043 | -382.66061 | -382.66028 |
| J        | -382.65883 | -382.65898 | -382.65904 | -382.65845 | -382.66059 | -382.65711 |
| TS-JK    | -382.60667 | -382.60640 | -382.60643 | -382.60789 | -382.60580 | -382.60684 |
| K        | -382.63938 | -382.64054 | -382.64071 | -382.64080 | -382.63800 | -382.63684 |
| TS-KL    | -382.63825 | -382.63970 | -382.63786 | -382.63667 | -382.64019 | -382.63681 |
| L        | -382.64685 | -382.65025 | -382.63646 | -382.64833 | -382.64929 | -382.64990 |
| TS-LM    | -382.53992 | -382.54166 | -382.54167 | -382.53952 | -382.54092 | -382.53582 |
| TS-LN    | -382.62278 | -382.62297 | -382.62217 | -382.62341 | -382.62312 | -382.62224 |
| TS-MN    | -382.58706 | -382.58730 | -382.58732 | -382.58787 | -382.58729 | -382.58553 |
| M        | -382.66740 | -382.66737 | -382.66775 | -382.66701 | -382.66747 | -382.66740 |
| N        | -382.64399 | -382.64368 | -382.64555 | -382.64308 | -382.64396 | -382.64368 |

Table S22: Total energies (in Hartree) of various molecules in the reaction set for EXCT. PRESERV.(4,4)/STO-3G calculations on statevector simulator

| Molecule | Average    | Run1       | Run2       | Run3       | Run4       | Run5       |
|----------|------------|------------|------------|------------|------------|------------|
| A        | -382.65902 | -382.65807 | -382.65889 | -382.65998 | -382.65806 | -382.66011 |
| TS-AA'   | -382.62554 | -382.62550 | -382.62574 | -382.62564 | -382.62527 | -382.62556 |
| A'       | -382.65935 | -382.65984 | -382.65855 | -382.65887 | -382.65969 | -382.65978 |
| F        | -382.61952 | -382.61875 | -382.61983 | -382.61968 | -382.61954 | -382.61978 |
| TS-FG    | -382.61330 | -382.61260 | -382.61290 | -382.61302 | -382.61379 | -382.61420 |
| G        | -382.66102 | -382.66114 | -382.66085 | -382.66054 | -382.66192 | -382.66065 |
| TS-GG'   | -382.64806 | -382.64875 | -382.64771 | -382.64723 | -382.64905 | -382.64755 |
| G'       | -382.66088 | -382.66160 | -382.66051 | -382.66102 | -382.66117 | -382.66011 |
| J        | -382.65875 | -382.65813 | -382.65842 | -382.65928 | -382.65815 | -382.65976 |
| TS-JK    | -382.60756 | -382.60725 | -382.60673 | -382.60799 | -382.60769 | -382.60816 |
| K        | -382.64101 | -382.64028 | -382.64073 | -382.64170 | -382.64080 | -382.64155 |
| TS-KL    | -382.63775 | -382.63672 | -382.63776 | -382.63960 | -382.63689 | -382.63776 |
| L        | -382.64965 | -382.64915 | -382.64958 | -382.64979 | -382.65015 | -382.64959 |
| TS-LM    | -382.54197 | -382.54122 | -382.54211 | -382.54276 | -382.54027 | -382.54350 |
| TS-LN    | -382.62280 | -382.62357 | -382.62306 | -382.62252 | -382.62228 | -382.62258 |
| TS-MN    | -382.58662 | -382.58723 | -382.58654 | -382.58611 | -382.58698 | -382.58625 |
| M        | -382.66707 | -382.66740 | -382.66677 | -382.66780 | -382.66732 | -382.66607 |
| N        | -382.64571 | -382.64554 | -382.64449 | -382.64717 | -382.64605 | -382.64531 |

Table S23: Total energies (in Hartree) of various molecules in the isomer set for EXCT. PRESERV.(4,4)/6-31G calculations on statevector simulator

| Molecule | Average    | Run1       | Run2       | Run3       | Run4       | Run5       |
|----------|------------|------------|------------|------------|------------|------------|
| 1        | -387.86396 | -387.86397 | -387.86405 | -387.86411 | -387.86373 | -387.86395 |
| exo-2    | -387.83921 | -387.83912 | -387.83919 | -387.83935 | -387.83919 | -387.83919 |
| endo-2   | -387.83141 | -387.83169 | -387.83122 | -387.83152 | -387.83123 | -387.83137 |
| 3        | -387.84547 | -387.84526 | -387.84547 | -387.84572 | -387.84553 | -387.84536 |
| 4        | -387.83573 | -387.83566 | -387.83563 | -387.83586 | -387.83572 | -387.83578 |
| syn-5    | -387.84689 | -387.84690 | -387.84696 | -387.84671 | -387.84704 | -387.84685 |
| anti-5   | -387.76034 | -387.76047 | -387.76041 | -387.76044 | -387.76023 | -387.76013 |
| syn-6    | -387.84161 | -387.84156 | -387.84168 | -387.84167 | -387.84152 | -387.84162 |
| anti-6   | -387.76508 | -387.76520 | -387.76503 | -387.76482 | -387.76515 | -387.76521 |
| 7        | -387.82524 | -387.82478 | -387.82562 | -387.82506 | -387.82548 | -387.82526 |
| exo-8    | -387.83564 | -387.83590 | -387.83561 | -387.83573 | -387.83557 | -387.83540 |
| endo-8   | -387.82194 | -387.82197 | -387.82189 | -387.82153 | -387.82208 | -387.82221 |
| 9        | -387.81674 | -387.81682 | -387.81747 | -387.81729 | -387.81644 | -387.81570 |
| 10       | -387.82476 | -387.82460 | -387.82506 | -387.82462 | -387.82491 | -387.82463 |
| syn-11   | -387.81025 | -387.81014 | -387.81023 | -387.81031 | -387.81043 | -387.81012 |
| anti-11  | -387.82662 | -387.82676 | -387.82638 | -387.82674 | -387.82643 | -387.82681 |
| 12       | -387.84452 | -387.84431 | -387.84449 | -387.84487 | -387.84446 | -387.84447 |
| 13       | -387.83406 | -387.83414 | -387.83399 | -387.83420 | -387.83391 | -387.83404 |
| 14       | -387.83248 | -387.83248 | -387.83260 | -387.83281 | -387.83204 | -387.83247 |
| 18       | -387.84135 | -387.84136 | -387.84134 | -387.84148 | -387.84135 | -387.84121 |
| 19       | -387.84392 | -387.84379 | -387.84399 | -387.84390 | -387.84379 | -387.84413 |

Table S24: Total energies (in Hartree) of various molecules in the reaction set for EXCT. PRESERV.(4,4)/6-31G calculations on statevector simulator

| <b>Molecule</b> | <b>Average</b> | <b>Run1</b> | <b>Run2</b> | <b>Run3</b> | <b>Run4</b> | <b>Run5</b> |
|-----------------|----------------|-------------|-------------|-------------|-------------|-------------|
| A               | -386.99392     | -386.99405  | -386.99349  | -386.99345  | -386.99338  | -386.99522  |
| TS-AA'          | -386.96349     | -386.96339  | -386.96363  | -386.96329  | -386.96306  | -386.96406  |
| A'              | -386.99394     | -386.99440  | -386.99291  | -386.99468  | -386.99313  | -386.99458  |
| F               | -386.96137     | -386.96190  | -386.96125  | -386.96193  | -386.96113  | -386.96063  |
| TS-FG           | -386.95374     | -386.95441  | -386.95348  | -386.95310  | -386.95423  | -386.95346  |
| G               | -386.99689     | -386.99750  | -386.99614  | -386.99702  | -386.99652  | -386.99728  |
| TS-GG'          | -386.98952     | -386.98967  | -386.98988  | -386.98907  | -386.98939  | -386.98961  |
| G'              | -386.99700     | -386.99659  | -386.99761  | -386.99670  | -386.99728  | -386.99682  |
| J               | -386.99753     | -386.99736  | -386.99805  | -386.99756  | -386.99826  | -386.99641  |
| TS-JK           | -386.94900     | -386.94809  | -386.94933  | -386.94923  | -386.94885  | -386.94950  |
| K               | -386.98313     | -386.98304  | -386.98314  | -386.98319  | -386.98306  | -386.98322  |
| TS-KL           | -386.98004     | -386.98026  | -386.97994  | -386.98047  | -386.97960  | -386.97993  |
| L               | -386.98559     | -386.98536  | -386.98509  | -386.98566  | -386.98638  | -386.98549  |
| TS-LM           | -386.89149     | -386.89195  | -386.89210  | -386.89058  | -386.89139  | -386.89144  |
| TS-LN           | -386.95591     | -386.95588  | -386.95613  | -386.95576  | -386.95582  | -386.95594  |
| TS-MN           | -386.93058     | -386.93020  | -386.93147  | -386.92959  | -386.93130  | -386.93034  |
| M               | -387.00079     | -387.00092  | -387.00082  | -387.00076  | -387.00059  | -387.00083  |
| N               | -386.98233     | -386.98208  | -386.98200  | -386.98241  | -386.98234  | -386.98284  |

Table S25: Total energies (in Hartree) of various molecules in the isomer set for EXCT. PRESERV.(6,6)/STO-3G calculations on statevector simulator

| Molecule | Average    | Run1       | Run2       | Run3       | Run4       | Run5       |
|----------|------------|------------|------------|------------|------------|------------|
| 1        | -383.51273 | -383.51274 | -383.51320 | -383.51290 | -383.51256 | -383.51227 |
| exo-2    | -383.48265 | -383.48225 | -383.48315 | -383.48301 | -383.48210 | -383.48274 |
| endo-2   | -383.47582 | -383.47562 | -383.47594 | -383.47664 | -383.47514 | -383.47574 |
| 3        | -383.49312 | -383.49186 | -383.49441 | -383.49310 | -383.49324 | -383.49297 |
| 4        | -383.48364 | -383.48343 | -383.48385 | -383.48336 | -383.48342 | -383.48412 |
| syn-5    | -383.49329 | -383.49269 | -383.49456 | -383.49385 | -383.49335 | -383.49198 |
| anti-5   | -383.39417 | -383.39347 | -383.39383 | -383.39371 | -383.39486 | -383.39500 |
| syn-6    | -383.48785 | -383.48891 | -383.48735 | -383.48807 | -383.48714 | -383.48779 |
| anti-6   | -383.40172 | -383.40219 | -383.40294 | -383.40050 | -383.40115 | -383.40180 |
| 7        | -383.46767 | -383.46678 | -383.46785 | -383.46839 | -383.46699 | -383.46834 |
| exo-8    | -383.47957 | -383.47802 | -383.48063 | -383.48077 | -383.48014 | -383.47828 |
| endo-8   | -383.46372 | -383.46252 | -383.46311 | -383.46482 | -383.46366 | -383.46447 |
| 9        | -383.46093 | -383.46067 | -383.46095 | -383.46133 | -383.46076 | -383.46096 |
| 10       | -383.47068 | -383.47096 | -383.46988 | -383.47105 | -383.47055 | -383.47099 |
| syn-11   | -383.45423 | -383.45480 | -383.45393 | -383.45361 | -383.45468 | -383.45410 |
| anti-11  | -383.47066 | -383.47019 | -383.47102 | -383.47065 | -383.47055 | -383.47091 |
| 12       | -383.49009 | -383.49037 | -383.49032 | -383.48974 | -383.49044 | -383.48959 |
| 13       | -383.47879 | -383.47930 | -383.47868 | -383.47865 | -383.47881 | -383.47851 |
| 14       | -383.47825 | -383.47824 | -383.47850 | -383.47840 | -383.47805 | -383.47807 |
| 18       | -383.48726 | -383.48794 | -383.48688 | -383.48717 | -383.48713 | -383.48720 |
| 19       | -383.49137 | -383.49161 | -383.49112 | -383.49208 | -383.49059 | -383.49148 |



Table S26: Total energies (in Hartree) of various molecules in the reaction set for EXCT. PRESERV.(6,6)/STO-3G calculations on statevector simulator

| Molecule | Average    | Run1       | Run2       | Run3       | Run4       | Run5       |
|----------|------------|------------|------------|------------|------------|------------|
| A        | -382.65863 | -382.65916 | -382.65956 | -382.65858 | -382.65745 | -382.65841 |
| TS-AA'   | -382.62522 | -382.62441 | -382.62441 | -382.62687 | -382.62557 | -382.62486 |
| A'       | -382.65882 | -382.65993 | -382.65956 | -382.65784 | -382.65861 | -382.65818 |
| F        | -382.62080 | -382.61993 | -382.62184 | -382.62117 | -382.62018 | -382.62090 |
| TS-FG    | -382.61094 | -382.61285 | -382.61261 | -382.60717 | -382.61035 | -382.61170 |
| G        | -382.66182 | -382.66298 | -382.66134 | -382.66116 | -382.66127 | -382.66234 |
| TS-GG'   | -382.64804 | -382.64711 | -382.64735 | -382.64928 | -382.64912 | -382.64736 |
| G'       | -382.66144 | -382.65932 | -382.66209 | -382.66417 | -382.66069 | -382.66093 |
| J        | -382.65947 | -382.66053 | -382.65927 | -382.65690 | -382.65813 | -382.66252 |
| TS-JK    | -382.60657 | -382.60543 | -382.60542 | -382.60738 | -382.60766 | -382.60697 |
| K        | -382.64005 | -382.64022 | -382.63905 | -382.64001 | -382.64024 | -382.64075 |
| TS-KL    | -382.63849 | -382.64069 | -382.63704 | -382.63776 | -382.63793 | -382.63901 |
| L        | -382.64996 | -382.64860 | -382.65034 | -382.65020 | -382.64947 | -382.65118 |
| TS-LM    | -382.54112 | -382.54262 | -382.53973 | -382.54243 | -382.54147 | -382.53934 |
| TS-LN    | -382.62341 | -382.62537 | -382.62315 | -382.62138 | -382.62317 | -382.62398 |
| TS-MN    | -382.58728 | -382.58460 | -382.58842 | -382.58726 | -382.58625 | -382.58988 |
| M        | -382.66670 | -382.66479 | -382.66700 | -382.66709 | -382.66600 | -382.66861 |
| N        | -382.64489 | -382.64598 | -382.64341 | -382.64388 | -382.64538 | -382.64579 |

Table S27: Total energies (in Hartree) of various molecules in the isomer set for EXCT. PRESERV.(6,6)/6-31G calculations on statevector simulator

| Molecule | Average    | Run1       | Run2       | Run3       | Run4       | Run5       |
|----------|------------|------------|------------|------------|------------|------------|
| 1        | -387.86380 | -387.86387 | -387.86356 | -387.86445 | -387.86393 | -387.86320 |
| exo-2    | -387.83927 | -387.83872 | -387.83882 | -387.83997 | -387.83951 | -387.83936 |
| endo-2   | -387.83153 | -387.83075 | -387.83122 | -387.83199 | -387.83181 | -387.83187 |
| 3        | -387.84532 | -387.84622 | -387.84476 | -387.84507 | -387.84549 | -387.84504 |
| 4        | -387.83596 | -387.83561 | -387.83645 | -387.83635 | -387.83598 | -387.83540 |
| syn-5    | -387.84698 | -387.84726 | -387.84777 | -387.84643 | -387.84706 | -387.84637 |
| anti-5   | -387.76026 | -387.76049 | -387.76048 | -387.76068 | -387.75972 | -387.75995 |
| syn-6    | -387.84120 | -387.84241 | -387.84083 | -387.84112 | -387.84075 | -387.84090 |
| anti-6   | -387.76476 | -387.76396 | -387.76471 | -387.76487 | -387.76528 | -387.76499 |
| 7        | -387.82542 | -387.82470 | -387.82578 | -387.82584 | -387.82530 | -387.82551 |
| exo-8    | -387.83586 | -387.83616 | -387.83581 | -387.83580 | -387.83597 | -387.83553 |
| endo-8   | -387.82216 | -387.82197 | -387.82116 | -387.82213 | -387.82265 | -387.82291 |
| 9        | -387.81704 | -387.81738 | -387.81723 | -387.81808 | -387.81629 | -387.81624 |
| 10       | -387.82463 | -387.82485 | -387.82407 | -387.82474 | -387.82436 | -387.82515 |
| syn-11   | -387.81030 | -387.81020 | -387.80995 | -387.81026 | -387.81088 | -387.81020 |
| anti-11  | -387.82710 | -387.82739 | -387.82754 | -387.82642 | -387.82694 | -387.82719 |
| 12       | -387.84419 | -387.84437 | -387.84402 | -387.84396 | -387.84427 | -387.84434 |
| 13       | -387.83402 | -387.83424 | -387.83344 | -387.83476 | -387.83381 | -387.83385 |
| 14       | -387.83304 | -387.83319 | -387.83291 | -387.83345 | -387.83276 | -387.83290 |
| 18       | -387.84142 | -387.84071 | -387.84125 | -387.84173 | -387.84202 | -387.84137 |
| 19       | -387.84380 | -387.84319 | -387.84332 | -387.84539 | -387.84345 | -387.84366 |

Table S28: Total energies (in Hartree) of various molecules in the reaction set for EXCT. PRESERV.(6,6)/6-31G calculations on statevector simulator

| Molecule | Average    | Run1       | Run2       | Run3       | Run4       | Run5       |
|----------|------------|------------|------------|------------|------------|------------|
| A        | -386.99365 | -386.99355 | -386.99336 | -386.99471 | -386.99307 | -386.99355 |
| TS-AA'   | -386.96380 | -386.96421 | -386.96266 | -386.96422 | -386.96510 | -386.96283 |
| A'       | -386.99407 | -386.99405 | -386.99412 | -386.99363 | -386.99405 | -386.99449 |
| F        | -386.96146 | -386.96223 | -386.96094 | -386.96131 | -386.96095 | -386.96187 |
| TS-FG    | -386.95312 | -386.95227 | -386.95306 | -386.95400 | -386.95271 | -386.95355 |
| G        | -386.99709 | -386.99817 | -386.99726 | -386.99563 | -386.99757 | -386.99684 |
| TS-GG'   | -386.98868 | -386.98861 | -386.98947 | -386.98812 | -386.98809 | -386.98911 |
| G'       | -386.99621 | -386.99786 | -386.99558 | -386.99453 | -386.99638 | -386.99671 |
| J        | -386.99734 | -386.99752 | -386.99723 | -386.99784 | -386.99783 | -386.99628 |
| TS-JK    | -386.94932 | -386.94847 | -386.94976 | -386.95096 | -386.94788 | -386.94954 |
| K        | -386.98377 | -386.98468 | -386.98363 | -386.98312 | -386.98426 | -386.98315 |
| TS-KL    | -386.97942 | -386.97941 | -386.97999 | -386.97904 | -386.97891 | -386.97975 |
| L        | -386.98627 | -386.98604 | -386.98745 | -386.98609 | -386.98599 | -386.98579 |
| TS-LM    | -386.89094 | -386.89216 | -386.89228 | -386.88878 | -386.89000 | -386.89148 |
| TS-LN    | -386.95514 | -386.95456 | -386.95678 | -386.95551 | -386.95393 | -386.95494 |
| TS-MN    | -386.93074 | -386.93134 | -386.93054 | -386.93062 | -386.93005 | -386.93115 |
| M        | -387.00049 | -386.99960 | -387.00083 | -387.00067 | -387.00042 | -387.00095 |
| N        | -386.98247 | -386.98211 | -386.98340 | -386.98172 | -386.98365 | -386.98145 |

Table S29: Total energies (in Hartree) of various molecules in the isomer set for Hartree–Fock (HF) and CASSCI methods

| Molecule | HF/<br>STO-3G | CASSCI(2,2)/<br>STO-3G | CASSCI(4,4)/<br>STO-3G | CASSCI(6,6)/<br>STO-3G | HF/<br>6-31G | CASSCI(2,2)/<br>6-31G | CASSCI(4,4)/<br>6-31G | CASSCI(6,6)/<br>6-31G |
|----------|---------------|------------------------|------------------------|------------------------|--------------|-----------------------|-----------------------|-----------------------|
| 1        | -383.51261    | -383.51308             | -383.51355             | -383.51473             | -387.86394   | -387.86396            | -387.86400            | -387.86416            |
| exo-2    | -383.48273    | -383.48278             | -383.48415             | -383.48543             | -387.83917   | -387.83917            | -387.83924            | -387.83930            |
| endo-2   | -383.47549    | -383.47583             | -383.47658             | -383.47775             | -387.83136   | -387.83140            | -387.83145            | -387.83150            |
| 3        | -383.49254    | -383.49261             | -383.49308             | -383.49420             | -387.84545   | -387.84547            | -387.84552            | -387.84558            |
| 4        | -383.48359    | -383.48396             | -383.48460             | -383.48532             | -387.83579   | -387.83580            | -387.83586            | -387.83590            |
| syn-5    | -383.49347    | -383.49351             | -383.49443             | -383.49617             | -387.84690   | -387.84691            | -387.84696            | -387.84703            |
| anti-5   | -383.39370    | -383.39386             | -383.39496             | -383.39622             | -387.76035   | -387.76037            | -387.76041            | -387.76069            |
| syn-6    | -383.48775    | -383.48781             | -383.48818             | -383.48928             | -387.84156   | -387.84158            | -387.84163            | -387.84168            |
| anti-6   | -383.40164    | -383.40189             | -383.40267             | -383.40365             | -387.76514   | -387.76516            | -387.76522            | -387.76529            |
| 7        | -383.46785    | -383.46861             | -383.46947             | -383.47047             | -387.82529   | -387.82530            | -387.82535            | -387.82541            |
| exo-8    | -383.47965    | -383.47972             | -383.48093             | -383.48233             | -387.83561   | -387.83562            | -387.83566            | -387.83575            |
| endo-8   | -383.46395    | -383.46434             | -383.46541             | -383.46687             | -387.82192   | -387.82193            | -387.82199            | -387.82206            |
| 9        | -383.46075    | -383.46099             | -383.46148             | -383.46240             | -387.81648   | -387.81650            | -387.81655            | -387.81660            |
| 10       | -383.47065    | -383.47080             | -383.47107             | -383.47216             | -387.82474   | -387.82474            | -387.82478            | -387.82488            |
| syn-11   | -383.45433    | -383.45442             | -383.45521             | -383.45671             | -387.81024   | -387.81025            | -387.81029            | -387.81035            |
| anti-11  | -383.47090    | -383.47099             | -383.47173             | -383.47265             | -387.82680   | -387.82681            | -387.82685            | -387.82694            |
| 12       | -383.49028    | -383.49066             | -383.49155             | -383.49250             | -387.84450   | -387.84452            | -387.84455            | -387.84463            |
| 13       | -383.47917    | -383.47927             | -383.48021             | -383.48127             | -387.83410   | -387.83412            | -387.83418            | -387.83423            |
| 14       | -383.47840    | -383.47843             | -383.47902             | -383.48016             | -387.83237   | -387.83240            | -387.83243            | -387.83254            |
| 18       | -383.48741    | -383.48767             | -383.48783             | -383.48825             | -387.84139   | -387.84140            | -387.84145            | -387.84154            |
| 19       | -383.49133    | -383.49139             | -383.49212             | -383.49292             | -387.84386   | -387.84388            | -387.84392            | -387.84398            |

Table S30: Total energies (in Hartree) of various molecules in the reaction set for Hartree–Fock (HF) and CASCI methods

| Molecule | HF/<br>STO-3G | CASCI(2,2)/<br>STO-3G | CASCI(4,4)/<br>STO-3G | CASCI(6,6)/<br>STO-3G | HF/<br>6-31G | CASCI(2,2)/<br>6-31G | CASCI(4,4)/<br>6-31G | CASCI(6,6)/<br>6-31G |
|----------|---------------|-----------------------|-----------------------|-----------------------|--------------|----------------------|----------------------|----------------------|
| A        | -382.65919    | -382.65923            | -382.65945            | -382.66306            | -386.99379   | -386.99385           | -386.99403           | -386.99506           |
| TS-AA'   | -382.62591    | -382.62661            | -382.62757            | -382.62859            | -386.96381   | -386.96465           | -386.96512           | -386.96566           |
| A'       | -382.65919    | -382.65923            | -382.65945            | -382.66306            | -386.99379   | -386.99385           | -386.99403           | -386.99506           |
| F        | -382.62000    | -382.62001            | -382.62004            | -382.62123            | -386.96160   | -386.96162           | -386.96168           | -386.96215           |
| TS-FG    | -382.61290    | -382.61291            | -382.61301            | -382.61398            | -386.95329   | -386.95329           | -386.95347           | -386.95380           |
| G        | -382.66094    | -382.66218            | -382.66417            | -382.66543            | -386.99696   | -386.99790           | -386.99805           | -386.99822           |
| TS-GG'   | -382.64868    | -382.65254            | -382.65672            | -382.65790            | -386.98903   | -386.99145           | -386.99383           | -386.99460           |
| G'       | -382.66094    | -382.66218            | -382.66417            | -382.66543            | -386.99696   | -386.99790           | -386.99805           | -386.99822           |
| J        | -382.65929    | -382.66271            | -382.66705            | -382.66816            | -386.99781   | -387.00041           | -387.00110           | -387.00172           |
| TS-JK    | -382.60705    | -382.60714            | -382.60722            | -382.60773            | -386.94955   | -386.94971           | -386.94981           | -386.94997           |
| K        | -382.64066    | -382.64066            | -382.64082            | -382.64116            | -386.98326   | -386.98326           | -386.98330           | -386.98375           |
| TS-KL    | -382.63815    | -382.63828            | -382.63904            | -382.63945            | -386.97994   | -386.98027           | -386.98067           | -386.98105           |
| L        | -382.64999    | -382.65000            | -382.65009            | -382.65039            | -386.98571   | -386.98573           | -386.98580           | -386.98604           |
| TS-LM    | -382.54171    | -382.54245            | -382.54347            | -382.54603            | -386.89178   | -386.89263           | -386.89314           | -386.89403           |
| TS-LN    | -382.62329    | -382.62330            | -382.62332            | -382.62356            | -386.95596   | -386.95598           | -386.95600           | -386.95606           |
| TS-MN    | -382.58622    | -382.58657            | -382.58708            | -382.58762            | -386.93034   | -386.93102           | -386.93127           | -386.93148           |
| M        | -382.66722    | -382.66735            | -382.66774            | -382.66870            | -387.00049   | -387.00067           | -387.00079           | -387.00109           |
| N        | -382.64500    | -382.64521            | -382.64563            | -382.64578            | -386.98233   | -386.98256           | -386.98261           | -386.98267           |

Table S31: Total energies (in Hartree) of various molecules in the isomer set for density functional theory based methods with STO-3G basis set

| Molecule | BLYP-D3BJ  | B3LYP-D3BJ | CAM-B3LYP-D3BJ | LC $\omega$ PBE-D3BJ | $\omega$ B97xD | M06-2X     |
|----------|------------|------------|----------------|----------------------|----------------|------------|
| 1        | -385.85214 | -386.14840 | -385.88301     | -385.94900           | -386.07447     | -386.11216 |
| exo-2    | -385.82193 | -386.11717 | -385.85237     | -385.91942           | -386.04462     | -386.08018 |
| endo-2   | -385.81727 | -386.11206 | -385.84705     | -385.91355           | -386.03897     | -386.07413 |
| 3        | -385.83423 | -386.12975 | -385.86447     | -385.93063           | -386.05602     | -386.09328 |
| 4        | -385.82642 | -386.12208 | -385.85717     | -385.92438           | -386.04790     | -386.08698 |
| syn-5    | -385.83199 | -386.12717 | -385.86220     | -385.92828           | -386.05489     | -386.08887 |
| anti-5   | -385.74743 | -386.03882 | -385.77266     | -385.83814           | -385.96503     | -385.99962 |
| syn-6    | -385.82890 | -386.12409 | -385.85896     | -385.92507           | -386.05099     | -386.08671 |
| anti-6   | -385.75742 | -386.04977 | -385.78384     | -385.85075           | -385.97490     | -386.01284 |
| 7        | -385.81038 | -386.10502 | -385.83990     | -385.90712           | -386.03197     | -386.06777 |
| exo-8    | -385.81930 | -386.11436 | -385.84947     | -385.91661           | -386.04172     | -386.07689 |
| endo-8   | -385.80674 | -386.10129 | -385.83617     | -385.90335           | -386.02815     | -386.06391 |
| 9        | -385.80672 | -386.10123 | -385.83592     | -385.90235           | -386.02725     | -386.06497 |
| 10       | -385.81686 | -386.11167 | -385.84635     | -385.91260           | -386.03705     | -386.07548 |
| syn-11   | -385.80332 | -386.09738 | -385.83196     | -385.89787           | -386.02266     | -386.06031 |
| anti-11  | -385.81597 | -386.11100 | -385.84594     | -385.91294           | -386.03693     | -386.07577 |
| 12       | -385.83122 | -386.12662 | -385.86146     | -385.92802           | -386.05336     | -386.08986 |
| 13       | -385.82019 | -386.11538 | -385.85045     | -385.91730           | -386.04221     | -386.07873 |
| 14       | -385.81968 | -386.11470 | -385.84974     | -385.91610           | -386.04153     | -386.07736 |
| 18       | -385.82918 | -386.12421 | -385.85880     | -385.92433           | -386.05101     | -386.08663 |
| 19       | -385.83161 | -386.12702 | -385.86198     | -385.92813           | -386.05339     | -386.08958 |

Table S32: Total energies (in Hartree) of various molecules in the reaction set for density functional theory based methods with STO-3G basis set

| Molecule | BLYP-D3BJ  | B3LYP-D3BJ | CAM-B3LYP-D3BJ | LC $\omega$ PBE-D3BJ | $\omega$ B97xD | M06-2X     |
|----------|------------|------------|----------------|----------------------|----------------|------------|
| A        | -384.97418 | -385.24871 | -384.98365     | -385.03453           | -385.17094     | -385.20956 |
| TS-AA'   | -384.94096 | -385.21669 | -384.95342     | -385.00747           | -385.14132     | -385.18308 |
| A'       | -384.97418 | -385.24871 | -384.98365     | -385.03453           | -385.17094     | -385.20956 |
| F        | -384.94296 | -385.21744 | -384.95285     | -385.00560           | -385.14098     | -385.18302 |
| TS-FG    | -384.93245 | -385.20660 | -384.94180     | -384.99435           | -385.12925     | -385.16998 |
| G        | -384.97688 | -385.25159 | -384.98663     | -385.03803           | -385.17399     | -385.21312 |
| TS-GG'   | -384.97036 | -385.24501 | -384.98028     | -385.03230           | -385.16841     | -385.20991 |
| G'       | -384.97688 | -385.25159 | -384.98663     | -385.03803           | -385.17399     | -385.21312 |
| J        | -384.98174 | -385.25553 | -384.98955     | -385.03948           | -385.17689     | -385.21754 |
| TS-JK    | -384.92750 | -385.20213 | -384.93793     | -384.99069           | -385.12537     | -385.16770 |
| K        | -384.96425 | -385.23823 | -384.97224     | -385.02208           | -385.15939     | -385.20080 |
| TS-KL    | -384.96444 | -385.23792 | -384.97156     | -385.02055           | -385.15853     | -385.20085 |
| L        | -384.97251 | -385.24696 | -384.98154     | -385.03156           | -385.16868     | -385.21099 |
| TS-LM    | -384.88303 | -385.15335 | -384.88643     | -384.93617           | -385.07370     | -385.11676 |
| TS-LN    | -384.94120 | -385.21856 | -384.95620     | -385.01348           | -385.14418     | -385.18823 |
| TS-MN    | -384.91754 | -385.19059 | -384.92513     | -384.97711           | -385.11182     | -385.15632 |
| M        | -384.98907 | -385.26295 | -384.99635     | -385.04583           | -385.18281     | -385.22406 |
| N        | -384.96674 | -385.24045 | -384.97409     | -385.02311           | -385.16014     | -385.20125 |

Table S33: Total energies (in Hartree) of various molecules in the isomer set for HWE-1(2,2)/STO-3G calculations on noisy *FakeQuito* backend without any error mitigation

| Molecule | Average    | Run1       | Run2       | Run3       | Run4       | Run5       | Run6       | Run7       | Run8       | Run9       | Run10      |
|----------|------------|------------|------------|------------|------------|------------|------------|------------|------------|------------|------------|
| 1        | -383.44570 | -383.44636 | -383.44464 | -383.45137 | -383.44424 | -383.44233 | -383.44225 | -383.44792 | -383.44119 | -383.44987 | -383.44683 |
| exo-2    | -383.41742 | -383.41985 | -383.41608 | -383.40939 | -383.41813 | -383.41483 | -383.41725 | -383.41782 | -383.42187 | -383.42414 | -383.41485 |
| endo-2   | -383.41038 | -383.40848 | -383.41266 | -383.41291 | -383.40649 | -383.41025 | -383.41337 | -383.40752 | -383.40755 | -383.41138 | -383.41320 |
| 3        | -383.42713 | -383.43118 | -383.43323 | -383.42785 | -383.42779 | -383.42411 | -383.42450 | -383.42654 | -383.42333 | -383.42329 | -383.42949 |
| 4        | -383.42059 | -383.42072 | -383.42162 | -383.42590 | -383.41701 | -383.41934 | -383.41610 | -383.42288 | -383.42367 | -383.41620 | -383.42243 |
| syn-5    | -383.42977 | -383.42964 | -383.43344 | -383.42951 | -383.42737 | -383.42804 | -383.42864 | -383.43276 | -383.42940 | -383.42996 | -383.42899 |
| anti-5   | -383.33654 | -383.34171 | -383.33067 | -383.34135 | -383.33663 | -383.33806 | -383.33435 | -383.33614 | -383.33638 | -383.33694 | -383.33313 |
| syn-6    | -383.42224 | -383.42201 | -383.42211 | -383.42566 | -383.42036 | -383.42178 | -383.41972 | -383.42159 | -383.41919 | -383.43063 | -383.41933 |
| anti-6   | -383.34209 | -383.34152 | -383.34012 | -383.34947 | -383.34150 | -383.34839 | -383.33999 | -383.33754 | -383.34228 | -383.33799 | -383.34212 |
| 7        | -383.40782 | -383.41154 | -383.40738 | -383.40190 | -383.40294 | -383.40923 | -383.40713 | -383.41027 | -383.40925 | -383.40879 | -383.40979 |
| exo-8    | -383.41936 | -383.41733 | -383.41930 | -383.42128 | -383.42179 | -383.41316 | -383.41878 | -383.41739 | -383.42478 | -383.42088 | -383.41890 |
| endo-8   | -383.40566 | -383.40490 | -383.40134 | -383.41096 | -383.40142 | -383.41018 | -383.40340 | -383.41115 | -383.40165 | -383.40384 | -383.40773 |
| 9        | -383.39584 | -383.39437 | -383.40207 | -383.38928 | -383.39494 | -383.39515 | -383.39846 | -383.39876 | -383.39513 | -383.39360 | -383.39668 |
| 10       | -383.40729 | -383.40278 | -383.40719 | -383.40880 | -383.40918 | -383.40679 | -383.40487 | -383.41021 | -383.40595 | -383.40694 | -383.41015 |
| syn-11   | -383.39041 | -383.39418 | -383.39321 | -383.38608 | -383.38906 | -383.39519 | -383.39369 | -383.38452 | -383.38873 | -383.38596 | -383.39348 |
| anti-11  | -383.40841 | -383.40521 | -383.41486 | -383.40697 | -383.40832 | -383.40441 | -383.40304 | -383.41182 | -383.41267 | -383.40902 | -383.40774 |
| 12       | -383.42659 | -383.42372 | -383.42846 | -383.42851 | -383.42630 | -383.42984 | -383.42323 | -383.42203 | -383.43112 | -383.42543 | -383.42725 |
| 13       | -383.41522 | -383.41698 | -383.42228 | -383.41592 | -383.41008 | -383.41445 | -383.42085 | -383.40842 | -383.41177 | -383.41649 | -383.41495 |
| 14       | -383.41689 | -383.42049 | -383.42054 | -383.41884 | -383.41546 | -383.41466 | -383.41532 | -383.41793 | -383.41585 | -383.41337 | -383.41646 |
| 18       | -383.42207 | -383.41878 | -383.42057 | -383.41800 | -383.42196 | -383.42466 | -383.42767 | -383.42108 | -383.42541 | -383.42028 | -383.42225 |
| 19       | -383.42662 | -383.41942 | -383.42619 | -383.42941 | -383.43076 | -383.42775 | -383.43019 | -383.42486 | -383.42857 | -383.42391 | -383.42514 |



Table S34: Total energies (in Hartree) of various molecules in the isomer set for HWE-2(2,2)/STO-3G calculations on noisy *FakeQuito* backend without any error mitigation

| Molecule | Average    | Run1       | Run2       | Run3       | Run4       | Run5       | Run6       | Run7       | Run8       | Run9       | Run10      |
|----------|------------|------------|------------|------------|------------|------------|------------|------------|------------|------------|------------|
| 1        | -383.42512 | -383.42082 | -383.42429 | -383.43347 | -383.42677 | -383.42167 | -383.42287 | -383.42349 | -383.42730 | -383.42693 | -383.42354 |
| exo-2    | -383.40445 | -383.40114 | -383.40131 | -383.40183 | -383.40168 | -383.40841 | -383.40134 | -383.41227 | -383.40304 | -383.40424 | -383.40926 |
| endo-2   | -383.39758 | -383.39233 | -383.40220 | -383.39412 | -383.39586 | -383.40106 | -383.39919 | -383.40139 | -383.40333 | -383.39753 | -383.38879 |
| 3        | -383.40956 | -383.41260 | -383.40790 | -383.40771 | -383.41002 | -383.40735 | -383.41112 | -383.40403 | -383.41755 | -383.40744 | -383.40991 |
| 4        | -383.40386 | -383.41296 | -383.40103 | -383.39694 | -383.40648 | -383.40102 | -383.40530 | -383.40754 | -383.40203 | -383.39734 | -383.40801 |
| syn-5    | -383.41328 | -383.40932 | -383.41070 | -383.42287 | -383.41539 | -383.40654 | -383.41706 | -383.40659 | -383.41844 | -383.41591 | -383.40991 |
| anti-5   | -383.32249 | -383.32854 | -383.31777 | -383.32429 | -383.31717 | -383.31612 | -383.32409 | -383.32303 | -383.32094 | -383.32656 | -383.32635 |
| syn-6    | -383.40752 | -383.41148 | -383.40337 | -383.40887 | -383.41128 | -383.41468 | -383.40462 | -383.40492 | -383.40936 | -383.40537 | -383.40121 |
| anti-6   | -383.32743 | -383.32440 | -383.32857 | -383.33133 | -383.33018 | -383.32907 | -383.32458 | -383.32993 | -383.32203 | -383.32293 | -383.33131 |
| 7        | -383.39472 | -383.39370 | -383.39445 | -383.39431 | -383.39279 | -383.39845 | -383.39685 | -383.38899 | -383.39127 | -383.40462 | -383.39180 |
| exo-8    | -383.40226 | -383.40922 | -383.39802 | -383.40634 | -383.40329 | -383.40633 | -383.40171 | -383.40220 | -383.40359 | -383.39699 | -383.39489 |
| endo-8   | -383.39071 | -383.39714 | -383.38636 | -383.38621 | -383.39565 | -383.38409 | -383.38976 | -383.39065 | -383.39040 | -383.39904 | -383.38777 |
| 9        | -383.38061 | -383.38378 | -383.38423 | -383.38419 | -383.37426 | -383.38052 | -383.38152 | -383.37958 | -383.37745 | -383.38270 | -383.37782 |
| 10       | -383.39202 | -383.39091 | -383.39158 | -383.39198 | -383.38777 | -383.39512 | -383.39646 | -383.39608 | -383.38941 | -383.38945 | -383.39146 |
| syn-11   | -383.37566 | -383.37583 | -383.37714 | -383.37886 | -383.37598 | -383.37680 | -383.37553 | -383.37269 | -383.37671 | -383.37144 | -383.37564 |
| anti-11  | -383.39448 | -383.39247 | -383.39755 | -383.39452 | -383.38516 | -383.39242 | -383.39652 | -383.39264 | -383.39690 | -383.39515 | -383.40147 |
| 12       | -383.40946 | -383.40761 | -383.40369 | -383.40903 | -383.41166 | -383.40502 | -383.41242 | -383.41766 | -383.40798 | -383.41279 | -383.40674 |
| 13       | -383.39783 | -383.39725 | -383.39727 | -383.39044 | -383.39163 | -383.39726 | -383.40054 | -383.40009 | -383.40441 | -383.40206 | -383.39734 |
| 14       | -383.40003 | -383.39475 | -383.40067 | -383.40749 | -383.39938 | -383.39536 | -383.39992 | -383.40132 | -383.39460 | -383.39945 | -383.40732 |
| 18       | -383.40386 | -383.40418 | -383.41149 | -383.40112 | -383.40077 | -383.40703 | -383.40436 | -383.41258 | -383.39788 | -383.40325 | -383.39593 |
| 19       | -383.40845 | -383.40196 | -383.41305 | -383.40772 | -383.40888 | -383.41159 | -383.40696 | -383.40098 | -383.41242 | -383.41449 | -383.40643 |

Table S35: Total energies (in Hartree) of various molecules in the isomer set for ESU2-RY(2,2)/STO-3G calculations on noisy *FakeQuito* backend without any error mitigation

| Molecule | Average    | Run1       | Run2       | Run3       | Run4       | Run5       | Run6       | Run7       | Run8       | Run9       | Run10      |
|----------|------------|------------|------------|------------|------------|------------|------------|------------|------------|------------|------------|
| 1        | -383.44503 | -383.44669 | -383.44495 | -383.44145 | -383.44247 | -383.44307 | -383.44777 | -383.44448 | -383.44831 | -383.44422 | -383.44686 |
| exo-2    | -383.42012 | -383.41554 | -383.41777 | -383.41597 | -383.41795 | -383.42373 | -383.42308 | -383.42232 | -383.42015 | -383.42731 | -383.41736 |
| endo-2   | -383.40871 | -383.41103 | -383.40736 | -383.40953 | -383.40718 | -383.40652 | -383.41377 | -383.40765 | -383.40394 | -383.41202 | -383.40809 |
| 3        | -383.42624 | -383.42313 | -383.42414 | -383.42640 | -383.42582 | -383.42515 | -383.42815 | -383.42980 | -383.42799 | -383.42559 | -383.42618 |
| 4        | -383.41982 | -383.41846 | -383.42291 | -383.41992 | -383.42720 | -383.41551 | -383.41720 | -383.41635 | -383.41828 | -383.42075 | -383.42165 |
| syn-5    | -383.42840 | -383.42425 | -383.42656 | -383.43212 | -383.43123 | -383.42892 | -383.42984 | -383.42645 | -383.42898 | -383.42989 | -383.42573 |
| anti-5   | -383.33284 | -383.33492 | -383.33301 | -383.33115 | -383.33101 | -383.33606 | -383.33337 | -383.33261 | -383.33320 | -383.33228 | -383.33074 |
| syn-6    | -383.42139 | -383.42694 | -383.42188 | -383.41906 | -383.42746 | -383.41589 | -383.41623 | -383.42638 | -383.42311 | -383.41676 | -383.42016 |
| anti-6   | -383.34263 | -383.34791 | -383.34478 | -383.34570 | -383.33982 | -383.34561 | -383.34483 | -383.33937 | -383.33565 | -383.33755 | -383.34510 |
| 7        | -383.40915 | -383.40593 | -383.40680 | -383.40992 | -383.41325 | -383.40390 | -383.41058 | -383.41178 | -383.41095 | -383.41401 | -383.40441 |
| exo-8    | -383.41602 | -383.41558 | -383.41955 | -383.42063 | -383.41426 | -383.41288 | -383.41533 | -383.41698 | -383.41172 | -383.41648 | -383.41677 |
| endo-8   | -383.40362 | -383.40069 | -383.40780 | -383.40595 | -383.40506 | -383.40423 | -383.40396 | -383.40143 | -383.40260 | -383.40526 | -383.39919 |
| 9        | -383.39648 | -383.39611 | -383.39632 | -383.39578 | -383.39254 | -383.39928 | -383.39244 | -383.39931 | -383.39723 | -383.39575 | -383.40006 |
| 10       | -383.40737 | -383.40547 | -383.40329 | -383.40326 | -383.41083 | -383.40872 | -383.40818 | -383.40792 | -383.40570 | -383.41070 | -383.40962 |
| syn-11   | -383.39185 | -383.39180 | -383.39291 | -383.39376 | -383.38887 | -383.39426 | -383.38613 | -383.39362 | -383.38695 | -383.39340 | -383.39681 |
| anti-11  | -383.40697 | -383.41096 | -383.40550 | -383.40767 | -383.40510 | -383.40804 | -383.39995 | -383.41162 | -383.40729 | -383.40566 | -383.40793 |
| 12       | -383.42441 | -383.42455 | -383.42173 | -383.42115 | -383.42546 | -383.42959 | -383.42672 | -383.42209 | -383.41889 | -383.42858 | -383.42529 |
| 13       | -383.41645 | -383.41524 | -383.41628 | -383.41781 | -383.41807 | -383.41191 | -383.41816 | -383.42021 | -383.41380 | -383.41612 | -383.41688 |
| 14       | -383.41627 | -383.41498 | -383.41588 | -383.42076 | -383.41993 | -383.41248 | -383.41494 | -383.41460 | -383.41678 | -383.41372 | -383.41865 |
| 18       | -383.42014 | -383.41937 | -383.42183 | -383.41910 | -383.41783 | -383.42355 | -383.41817 | -383.41764 | -383.42275 | -383.41793 | -383.42321 |
| 19       | -383.42625 | -383.42886 | -383.42371 | -383.42998 | -383.42873 | -383.43367 | -383.42360 | -383.42127 | -383.42217 | -383.42634 | -383.42414 |

Table S36: Total energies (in Hartree) of various molecules in the isomer set for ESU2-RYRZ(2,2)/STO-3G calculations on noisy *FakeQuito* backend without any error mitigation

| Molecule | Average    | Run1       | Run2       | Run3       | Run4       | Run5       | Run6       | Run7       | Run8       | Run9       | Run10      |
|----------|------------|------------|------------|------------|------------|------------|------------|------------|------------|------------|------------|
| 1        | -383.44416 | -383.44199 | -383.44942 | -383.44646 | -383.44548 | -383.44028 | -383.44199 | -383.44733 | -383.44020 | -383.44046 | -383.44802 |
| exo-2    | -383.41820 | -383.41574 | -383.42036 | -383.42109 | -383.41614 | -383.41844 | -383.41388 | -383.41553 | -383.42221 | -383.41821 | -383.42034 |
| endo-2   | -383.41073 | -383.41454 | -383.41015 | -383.40785 | -383.41236 | -383.41073 | -383.41057 | -383.40402 | -383.41165 | -383.41893 | -383.40648 |
| 3        | -383.42852 | -383.42985 | -383.42818 | -383.42492 | -383.42708 | -383.42509 | -383.42700 | -383.43627 | -383.42666 | -383.42491 | -383.43526 |
| 4        | -383.42129 | -383.42247 | -383.42333 | -383.42894 | -383.41675 | -383.41992 | -383.41986 | -383.41741 | -383.42447 | -383.42134 | -383.41839 |
| syn-5    | -383.43081 | -383.43412 | -383.43227 | -383.42306 | -383.42816 | -383.42936 | -383.42459 | -383.43563 | -383.43348 | -383.43345 | -383.43394 |
| anti-5   | -383.33450 | -383.33698 | -383.33519 | -383.33584 | -383.33364 | -383.33943 | -383.33475 | -383.33150 | -383.32981 | -383.33535 | -383.33249 |
| syn-6    | -383.42173 | -383.41976 | -383.42366 | -383.41982 | -383.42242 | -383.42100 | -383.42352 | -383.42174 | -383.42417 | -383.41919 | -383.42201 |
| anti-6   | -383.34132 | -383.34343 | -383.34379 | -383.33803 | -383.33945 | -383.33976 | -383.34274 | -383.33852 | -383.34430 | -383.34194 | -383.34120 |
| 7        | -383.41046 | -383.40847 | -383.41138 | -383.40696 | -383.40585 | -383.41103 | -383.41326 | -383.41183 | -383.41587 | -383.41071 | -383.40920 |
| exo-8    | -383.41940 | -383.41724 | -383.41813 | -383.41423 | -383.41860 | -383.42162 | -383.42474 | -383.42254 | -383.42221 | -383.41351 | -383.42114 |
| endo-8   | -383.40363 | -383.39825 | -383.40279 | -383.40697 | -383.39979 | -383.39940 | -383.40002 | -383.40565 | -383.41005 | -383.40481 | -383.40855 |
| 9        | -383.39770 | -383.39774 | -383.39798 | -383.39406 | -383.39931 | -383.39675 | -383.39530 | -383.39635 | -383.39909 | -383.39795 | -383.40246 |
| 10       | -383.40631 | -383.40337 | -383.40845 | -383.40527 | -383.40649 | -383.40341 | -383.40950 | -383.40946 | -383.40299 | -383.40604 | -383.40810 |
| syn-11   | -383.38948 | -383.38631 | -383.39161 | -383.39299 | -383.38865 | -383.39127 | -383.38904 | -383.38588 | -383.38644 | -383.38866 | -383.39391 |
| anti-11  | -383.40907 | -383.40891 | -383.41153 | -383.40642 | -383.41213 | -383.41080 | -383.40926 | -383.40532 | -383.40888 | -383.40749 | -383.40991 |
| 12       | -383.42309 | -383.41918 | -383.42652 | -383.42803 | -383.41930 | -383.42794 | -383.42249 | -383.41998 | -383.42233 | -383.42139 | -383.42376 |
| 13       | -383.41632 | -383.40812 | -383.41804 | -383.41916 | -383.41654 | -383.41508 | -383.41167 | -383.42396 | -383.41814 | -383.41672 | -383.41576 |
| 14       | -383.41523 | -383.41213 | -383.41552 | -383.41659 | -383.41292 | -383.42032 | -383.41845 | -383.41386 | -383.41274 | -383.41639 | -383.41335 |
| 18       | -383.42260 | -383.42489 | -383.42139 | -383.42075 | -383.42365 | -383.42285 | -383.41796 | -383.42358 | -383.42535 | -383.42501 | -383.42060 |
| 19       | -383.42577 | -383.42945 | -383.42511 | -383.43268 | -383.42232 | -383.42855 | -383.42524 | -383.42222 | -383.42435 | -383.42498 | -383.42274 |

Table S37: Total energies (in Hartree) of various molecules in the isomer set for EXCT. PRESERV.(2,2)/STO-3G calculations on noisy *FakeQuito* backend without any error mitigation

| Molecule | Average    | Run1       | Run2       | Run3       | Run4       | Run5       | Run6       | Run7       | Run8       | Run9       | Run10      |
|----------|------------|------------|------------|------------|------------|------------|------------|------------|------------|------------|------------|
| 1        | -383.41276 | -383.41929 | -383.41240 | -383.40761 | -383.41372 | -383.41775 | -383.40981 | -383.41057 | -383.41410 | -383.41216 | -383.41017 |
| exo-2    | -383.39006 | -383.39296 | -383.38872 | -383.38868 | -383.39310 | -383.38846 | -383.38874 | -383.39306 | -383.38813 | -383.38912 | -383.38961 |
| endo-2   | -383.38115 | -383.38445 | -383.38097 | -383.38477 | -383.37882 | -383.38143 | -383.37909 | -383.38002 | -383.37965 | -383.37913 | -383.38314 |
| 3        | -383.39654 | -383.40096 | -383.39709 | -383.39631 | -383.39584 | -383.40199 | -383.39786 | -383.39599 | -383.39591 | -383.39472 | -383.38870 |
| 4        | -383.39553 | -383.39545 | -383.38830 | -383.39883 | -383.39508 | -383.39689 | -383.39860 | -383.39238 | -383.39327 | -383.39907 | -383.39746 |
| syn-5    | -383.40165 | -383.40161 | -383.40240 | -383.40111 | -383.40161 | -383.39601 | -383.40176 | -383.40248 | -383.40136 | -383.40197 | -383.40619 |
| anti-5   | -383.30694 | -383.31085 | -383.30412 | -383.30575 | -383.30766 | -383.30721 | -383.30833 | -383.30341 | -383.30535 | -383.30651 | -383.31023 |
| syn-6    | -383.39170 | -383.39607 | -383.38948 | -383.39633 | -383.39207 | -383.38834 | -383.38537 | -383.39515 | -383.39318 | -383.39291 | -383.38812 |
| anti-6   | -383.31651 | -383.31915 | -383.31983 | -383.31277 | -383.31600 | -383.31643 | -383.31100 | -383.31907 | -383.31704 | -383.31754 | -383.31624 |
| 7        | -383.38249 | -383.38228 | -383.37912 | -383.38535 | -383.38365 | -383.38550 | -383.38182 | -383.38269 | -383.37977 | -383.38316 | -383.38154 |
| exo-8    | -383.39031 | -383.38516 | -383.38745 | -383.38691 | -383.39088 | -383.38855 | -383.39286 | -383.39704 | -383.39238 | -383.39130 | -383.39052 |
| endo-8   | -383.37852 | -383.38033 | -383.37170 | -383.38075 | -383.37665 | -383.38061 | -383.37863 | -383.37780 | -383.38062 | -383.38216 | -383.37595 |
| 9        | -383.36759 | -383.36544 | -383.36705 | -383.37182 | -383.36809 | -383.36951 | -383.36312 | -383.36676 | -383.36812 | -383.36766 | -383.36833 |
| 10       | -383.37757 | -383.38093 | -383.37105 | -383.37984 | -383.37914 | -383.37871 | -383.37970 | -383.37452 | -383.37541 | -383.38197 | -383.37447 |
| syn-11   | -383.36523 | -383.36523 | -383.36818 | -383.36418 | -383.36639 | -383.36111 | -383.36600 | -383.36268 | -383.36671 | -383.36404 | -383.36781 |
| anti-11  | -383.37972 | -383.37705 | -383.37806 | -383.37972 | -383.37968 | -383.37845 | -383.38311 | -383.37804 | -383.38351 | -383.37749 | -383.38209 |
| 12       | -383.39598 | -383.39797 | -383.39131 | -383.39832 | -383.39571 | -383.39533 | -383.39842 | -383.39808 | -383.39627 | -383.39288 | -383.39554 |
| 13       | -383.38832 | -383.38665 | -383.38705 | -383.38928 | -383.39189 | -383.39104 | -383.38907 | -383.38738 | -383.38766 | -383.38930 | -383.38387 |
| 14       | -383.38842 | -383.39064 | -383.38964 | -383.38898 | -383.38267 | -383.38480 | -383.39455 | -383.38863 | -383.38746 | -383.38869 | -383.38817 |
| 18       | -383.39171 | -383.39241 | -383.39205 | -383.39467 | -383.39194 | -383.39185 | -383.38996 | -383.38774 | -383.39449 | -383.39097 | -383.39099 |
| 19       | -383.39594 | -383.39441 | -383.39498 | -383.39860 | -383.39643 | -383.39697 | -383.39624 | -383.39471 | -383.39731 | -383.39411 | -383.39565 |

Table S38: Total energies (in Hartree) of various molecules in the reaction set for HWE-1(2,2)/STO-3G calculations on noisy *FakeQuito* backend without any error mitigation

| Molecule | Average    | Run1       | Run2       | Run3       | Run4       | Run5       | Run6       | Run7       | Run8       | Run9       | Run10      |
|----------|------------|------------|------------|------------|------------|------------|------------|------------|------------|------------|------------|
| A        | -382.62805 | -382.62656 | -382.62767 | -382.63096 | -382.62991 | -382.63018 | -382.62642 | -382.62744 | -382.62515 | -382.62942 | -382.62677 |
| TS-AA'   | -382.59112 | -382.59020 | -382.59046 | -382.59233 | -382.58857 | -382.59267 | -382.58991 | -382.59403 | -382.59178 | -382.58974 | -382.59152 |
| A'       | -382.62661 | -382.62783 | -382.63019 | -382.62803 | -382.62398 | -382.62724 | -382.62600 | -382.62720 | -382.62777 | -382.62056 | -382.62730 |
| F        | -382.57766 | -382.57477 | -382.57545 | -382.58295 | -382.58229 | -382.57495 | -382.57688 | -382.57697 | -382.57819 | -382.57671 | -382.57737 |
| TS-FG    | -382.57498 | -382.57551 | -382.57562 | -382.57720 | -382.57736 | -382.57493 | -382.56966 | -382.57852 | -382.57573 | -382.57401 | -382.57127 |
| G        | -382.63205 | -382.63277 | -382.63365 | -382.63093 | -382.62979 | -382.63398 | -382.63271 | -382.63199 | -382.62964 | -382.63180 | -382.63320 |
| TS-GG'   | -382.61738 | -382.61849 | -382.61743 | -382.61421 | -382.61744 | -382.61503 | -382.61828 | -382.61673 | -382.61628 | -382.62136 | -382.61856 |
| G'       | -382.63169 | -382.63295 | -382.63137 | -382.63137 | -382.62928 | -382.63164 | -382.63309 | -382.63097 | -382.63516 | -382.62782 | -382.63326 |
| J        | -382.63232 | -382.63096 | -382.63426 | -382.63070 | -382.63476 | -382.63245 | -382.63233 | -382.63303 | -382.63282 | -382.62901 | -382.63291 |
| TS-JK    | -382.57200 | -382.57133 | -382.57164 | -382.57298 | -382.57345 | -382.57382 | -382.56780 | -382.56983 | -382.57462 | -382.57296 | -382.57157 |
| K        | -382.60567 | -382.60371 | -382.60683 | -382.60545 | -382.60393 | -382.60601 | -382.60649 | -382.60603 | -382.60471 | -382.60853 | -382.60503 |
| TS-KL    | -382.60590 | -382.60619 | -382.60955 | -382.60640 | -382.60572 | -382.60297 | -382.60298 | -382.60928 | -382.60598 | -382.60740 | -382.60249 |
| L        | -382.61354 | -382.61267 | -382.61492 | -382.61514 | -382.61185 | -382.61333 | -382.61178 | -382.61320 | -382.61304 | -382.61597 | -382.61349 |
| TS-LM    | -382.51657 | -382.51804 | -382.51671 | -382.51650 | -382.51513 | -382.51609 | -382.51680 | -382.51807 | -382.51626 | -382.51741 | -382.51470 |
| TS-LN    | -382.58043 | -382.58099 | -382.58086 | -382.58181 | -382.57883 | -382.57660 | -382.58335 | -382.58031 | -382.58367 | -382.57757 | -382.58025 |
| TS-MN    | -382.55373 | -382.55523 | -382.54742 | -382.55509 | -382.55360 | -382.55774 | -382.55464 | -382.55413 | -382.55177 | -382.55555 | -382.55212 |
| M        | -382.63735 | -382.63773 | -382.63413 | -382.63429 | -382.63842 | -382.64026 | -382.63832 | -382.63735 | -382.63715 | -382.64058 | -382.63526 |
| N        | -382.61522 | -382.61319 | -382.61559 | -382.60902 | -382.61768 | -382.61589 | -382.61663 | -382.61567 | -382.61686 | -382.61606 | -382.61557 |

Table S39: Total energies (in Hartree) of various molecules in the reaction set for HWE-2(2,2)/STO-3G calculations on noisy *FakeQuito* backend without any error mitigation

| Molecule | Average    | Run1       | Run2       | Run3       | Run4       | Run5       | Run6       | Run7       | Run8       | Run9       | Run10      |
|----------|------------|------------|------------|------------|------------|------------|------------|------------|------------|------------|------------|
| A        | -382.61892 | -382.61754 | -382.61684 | -382.62005 | -382.62163 | -382.61634 | -382.62077 | -382.62165 | -382.61793 | -382.62076 | -382.61564 |
| TS-AA'   | -382.58247 | -382.57796 | -382.58734 | -382.58899 | -382.58211 | -382.58449 | -382.58477 | -382.57854 | -382.58160 | -382.57929 | -382.57961 |
| A'       | -382.61691 | -382.61264 | -382.61492 | -382.62065 | -382.62174 | -382.61798 | -382.61724 | -382.61552 | -382.61211 | -382.61805 | -382.61824 |
| F        | -382.56435 | -382.56363 | -382.56959 | -382.56506 | -382.56844 | -382.56511 | -382.56059 | -382.56154 | -382.56078 | -382.56219 | -382.56661 |
| TS-FG    | -382.56510 | -382.56907 | -382.56783 | -382.56987 | -382.56188 | -382.56165 | -382.56140 | -382.56388 | -382.56275 | -382.56220 | -382.57043 |
| G        | -382.62352 | -382.61758 | -382.62356 | -382.62671 | -382.62039 | -382.62425 | -382.62362 | -382.62036 | -382.62283 | -382.62861 | -382.62729 |
| TS-GG'   | -382.60802 | -382.61188 | -382.61077 | -382.60716 | -382.60806 | -382.60667 | -382.61064 | -382.60904 | -382.60738 | -382.60156 | -382.60703 |
| G'       | -382.62322 | -382.62670 | -382.62407 | -382.62100 | -382.62173 | -382.61898 | -382.62430 | -382.62354 | -382.62258 | -382.62372 | -382.62560 |
| J        | -382.62522 | -382.62175 | -382.62899 | -382.62513 | -382.62190 | -382.62462 | -382.62580 | -382.62391 | -382.62520 | -382.62723 | -382.62770 |
| TS-JK    | -382.56355 | -382.55820 | -382.56394 | -382.56277 | -382.56996 | -382.56352 | -382.55481 | -382.56583 | -382.56039 | -382.56935 | -382.56676 |
| K        | -382.59403 | -382.59344 | -382.59497 | -382.59500 | -382.59755 | -382.59914 | -382.59043 | -382.59332 | -382.59011 | -382.59457 | -382.59181 |
| TS-KL    | -382.59760 | -382.59983 | -382.59323 | -382.60068 | -382.60465 | -382.59433 | -382.59875 | -382.59239 | -382.59679 | -382.59615 | -382.59917 |
| L        | -382.60308 | -382.60948 | -382.60384 | -382.60097 | -382.60189 | -382.61057 | -382.60028 | -382.59764 | -382.60330 | -382.60304 | -382.59976 |
| TS-LM    | -382.50904 | -382.51176 | -382.50977 | -382.51113 | -382.50716 | -382.51214 | -382.51125 | -382.50491 | -382.50611 | -382.50731 | -382.50889 |
| TS-LN    | -382.56572 | -382.56863 | -382.56791 | -382.56127 | -382.56761 | -382.56974 | -382.57543 | -382.56380 | -382.56251 | -382.56159 | -382.55873 |
| TS-MN    | -382.54363 | -382.54466 | -382.54061 | -382.53722 | -382.54477 | -382.54079 | -382.53922 | -382.54745 | -382.54733 | -382.54693 | -382.54735 |
| M        | -382.62888 | -382.62739 | -382.62677 | -382.63134 | -382.63320 | -382.62913 | -382.62653 | -382.62780 | -382.63405 | -382.62638 | -382.62625 |
| N        | -382.60563 | -382.60491 | -382.60554 | -382.60644 | -382.60690 | -382.61013 | -382.60385 | -382.59791 | -382.61135 | -382.60612 | -382.60315 |

Table S40: Total energies (in Hartree) of various molecules in the reaction set for ESU2-RY(2,2)/STO-3G calculations on noisy *FakeQuito* backend without any error mitigation

| Molecule | Average    | Run1       | Run2       | Run3       | Run4       | Run5       | Run6       | Run7       | Run8       | Run9       | Run10      |
|----------|------------|------------|------------|------------|------------|------------|------------|------------|------------|------------|------------|
| A        | -382.62774 | -382.62828 | -382.62553 | -382.62842 | -382.62748 | -382.62596 | -382.62602 | -382.62966 | -382.63147 | -382.62674 | -382.62784 |
| TS-AA'   | -382.59097 | -382.59086 | -382.59121 | -382.58930 | -382.59167 | -382.59089 | -382.59082 | -382.59178 | -382.59215 | -382.59298 | -382.58806 |
| A'       | -382.62801 | -382.62820 | -382.63009 | -382.62526 | -382.62626 | -382.62922 | -382.62764 | -382.62730 | -382.62999 | -382.62714 | -382.62903 |
| F        | -382.57709 | -382.57457 | -382.57910 | -382.57436 | -382.57397 | -382.58024 | -382.57953 | -382.57161 | -382.57763 | -382.58231 | -382.57755 |
| TS-FG    | -382.57624 | -382.57532 | -382.57314 | -382.57575 | -382.57600 | -382.57314 | -382.57648 | -382.57794 | -382.57881 | -382.57728 | -382.57850 |
| G        | -382.63174 | -382.63460 | -382.63315 | -382.62828 | -382.63307 | -382.62995 | -382.63406 | -382.62968 | -382.63107 | -382.63377 | -382.62979 |
| TS-GG'   | -382.61752 | -382.62090 | -382.61871 | -382.61870 | -382.61851 | -382.61384 | -382.61461 | -382.61761 | -382.61811 | -382.61831 | -382.61595 |
| G'       | -382.63094 | -382.63217 | -382.62328 | -382.62902 | -382.63293 | -382.63203 | -382.63293 | -382.63341 | -382.63063 | -382.63095 | -382.63200 |
| J        | -382.63233 | -382.63200 | -382.63441 | -382.62753 | -382.62970 | -382.63452 | -382.63283 | -382.63282 | -382.63256 | -382.63435 | -382.63259 |
| TS-JK    | -382.57162 | -382.57391 | -382.56928 | -382.57155 | -382.57108 | -382.57517 | -382.57539 | -382.56977 | -382.57178 | -382.56973 | -382.56853 |
| K        | -382.60561 | -382.60514 | -382.60636 | -382.60616 | -382.60404 | -382.60686 | -382.60443 | -382.60527 | -382.60829 | -382.60671 | -382.60286 |
| TS-KL    | -382.60589 | -382.60492 | -382.60611 | -382.60462 | -382.60586 | -382.60494 | -382.60672 | -382.60683 | -382.60832 | -382.60491 | -382.60567 |
| L        | -382.61317 | -382.61468 | -382.61418 | -382.61116 | -382.60852 | -382.61427 | -382.61200 | -382.61292 | -382.61499 | -382.61708 | -382.61189 |
| TS-LM    | -382.51546 | -382.51514 | -382.51508 | -382.51739 | -382.51631 | -382.51599 | -382.51429 | -382.51335 | -382.51529 | -382.51699 | -382.51476 |
| TS-LN    | -382.57880 | -382.58337 | -382.58236 | -382.57608 | -382.57503 | -382.57250 | -382.57890 | -382.57801 | -382.57439 | -382.58310 | -382.58423 |
| TS-MN    | -382.55281 | -382.55517 | -382.55245 | -382.55564 | -382.54908 | -382.55250 | -382.55310 | -382.54915 | -382.55445 | -382.55424 | -382.55233 |
| M        | -382.63737 | -382.63660 | -382.63576 | -382.63597 | -382.63749 | -382.63875 | -382.63515 | -382.64063 | -382.63873 | -382.63735 | -382.63723 |
| N        | -382.61599 | -382.61599 | -382.61583 | -382.61486 | -382.61494 | -382.61630 | -382.61506 | -382.61777 | -382.61726 | -382.61598 | -382.61589 |

Table S41: Total energies (in Hartree) of various molecules in the reaction set for ESU2-RYRZ(2,2)/STO-3G calculations on noisy *FakeQuito* backend without any error mitigation

| Molecule | Average    | Run1       | Run2       | Run3       | Run4       | Run5       | Run6       | Run7       | Run8       | Run9       | Run10      |
|----------|------------|------------|------------|------------|------------|------------|------------|------------|------------|------------|------------|
| A        | -382.62834 | -382.62418 | -382.62958 | -382.62983 | -382.62873 | -382.62952 | -382.62947 | -382.62831 | -382.62929 | -382.62606 | -382.62841 |
| TS-AA'   | -382.58987 | -382.58848 | -382.58787 | -382.59040 | -382.59360 | -382.58828 | -382.58879 | -382.58944 | -382.58905 | -382.59082 | -382.59195 |
| A'       | -382.62794 | -382.62875 | -382.62996 | -382.62768 | -382.62618 | -382.62910 | -382.62840 | -382.62831 | -382.62633 | -382.62749 | -382.62717 |
| F        | -382.57626 | -382.57477 | -382.57457 | -382.57876 | -382.57413 | -382.57644 | -382.57631 | -382.57705 | -382.57904 | -382.57615 | -382.57541 |
| TS-FG    | -382.57583 | -382.57948 | -382.57020 | -382.57457 | -382.57552 | -382.57445 | -382.57441 | -382.57787 | -382.57516 | -382.57849 | -382.57817 |
| G        | -382.63169 | -382.62672 | -382.63606 | -382.63209 | -382.63167 | -382.63143 | -382.63362 | -382.62976 | -382.63280 | -382.63221 | -382.63057 |
| TS-GG'   | -382.61619 | -382.62059 | -382.61432 | -382.61935 | -382.61997 | -382.61536 | -382.61320 | -382.61454 | -382.61795 | -382.61414 | -382.61248 |
| G'       | -382.63044 | -382.63181 | -382.62733 | -382.62795 | -382.63428 | -382.63157 | -382.62659 | -382.63253 | -382.62995 | -382.63149 | -382.63087 |
| J        | -382.63049 | -382.63063 | -382.63147 | -382.63198 | -382.63104 | -382.62865 | -382.62240 | -382.63178 | -382.63122 | -382.63360 | -382.63211 |
| TS-JK    | -382.57108 | -382.56803 | -382.57177 | -382.57174 | -382.57421 | -382.56863 | -382.57385 | -382.56742 | -382.56986 | -382.57395 | -382.57133 |
| K        | -382.60542 | -382.60309 | -382.60811 | -382.60198 | -382.60463 | -382.60582 | -382.60633 | -382.60450 | -382.60563 | -382.60574 | -382.60838 |
| TS-KL    | -382.60531 | -382.60559 | -382.60603 | -382.60648 | -382.60658 | -382.59792 | -382.60392 | -382.60551 | -382.60840 | -382.60636 | -382.60635 |
| L        | -382.61400 | -382.61343 | -382.61297 | -382.61166 | -382.61339 | -382.61350 | -382.61287 | -382.61549 | -382.61564 | -382.61465 | -382.61642 |
| TS-LM    | -382.51569 | -382.51373 | -382.51264 | -382.51666 | -382.51784 | -382.51458 | -382.51810 | -382.51909 | -382.51643 | -382.51545 | -382.51234 |
| TS-LN    | -382.57885 | -382.57756 | -382.58167 | -382.57675 | -382.57949 | -382.58140 | -382.57880 | -382.57792 | -382.57806 | -382.57892 | -382.57798 |
| TS-MN    | -382.55313 | -382.55084 | -382.55258 | -382.55316 | -382.55240 | -382.55416 | -382.55342 | -382.55400 | -382.55382 | -382.55304 | -382.55385 |
| M        | -382.63670 | -382.63714 | -382.63862 | -382.63935 | -382.63821 | -382.63563 | -382.63688 | -382.63456 | -382.63391 | -382.63340 | -382.63926 |
| N        | -382.61548 | -382.61585 | -382.61513 | -382.61346 | -382.61322 | -382.61663 | -382.61615 | -382.61748 | -382.61615 | -382.61361 | -382.61708 |



Table S42: Total energies (in Hartree) of various molecules in the reaction set for EXCT. PRESERV.(2,2)/STO-3G calculations on noisy *FakeQuito* backend without any error mitigation

| Molecule | Average    | Run1       | Run2       | Run3       | Run4       | Run5       | Run6       | Run7       | Run8       | Run9       | Run10      |
|----------|------------|------------|------------|------------|------------|------------|------------|------------|------------|------------|------------|
| A        | -382.61140 | -382.60922 | -382.60963 | -382.61226 | -382.61148 | -382.60912 | -382.61275 | -382.61236 | -382.61325 | -382.61246 | -382.61143 |
| TS-AA'   | -382.57504 | -382.57329 | -382.57637 | -382.57423 | -382.57635 | -382.57600 | -382.57633 | -382.57141 | -382.57534 | -382.57527 | -382.57581 |
| A'       | -382.61139 | -382.61354 | -382.60835 | -382.60983 | -382.61064 | -382.61204 | -382.61205 | -382.61257 | -382.61383 | -382.61062 | -382.61038 |
| F        | -382.55390 | -382.55530 | -382.55526 | -382.55090 | -382.55444 | -382.54887 | -382.55809 | -382.55534 | -382.55390 | -382.55180 | -382.55506 |
| TS-FG    | -382.55821 | -382.55879 | -382.55657 | -382.55780 | -382.55886 | -382.55980 | -382.55804 | -382.55911 | -382.55845 | -382.55632 | -382.55836 |
| G        | -382.61716 | -382.61779 | -382.61744 | -382.61612 | -382.61756 | -382.61886 | -382.61605 | -382.61648 | -382.61693 | -382.61823 | -382.61616 |
| TS-GG'   | -382.59926 | -382.60031 | -382.59944 | -382.60222 | -382.59999 | -382.60039 | -382.60220 | -382.59914 | -382.59904 | -382.59240 | -382.59748 |
| G'       | -382.61647 | -382.61618 | -382.61691 | -382.61614 | -382.61719 | -382.61585 | -382.61626 | -382.61751 | -382.61360 | -382.61807 | -382.61703 |
| J        | -382.61796 | -382.61702 | -382.61960 | -382.61687 | -382.61991 | -382.61648 | -382.61805 | -382.61855 | -382.61690 | -382.61598 | -382.62020 |
| TS-JK    | -382.55434 | -382.55371 | -382.55594 | -382.55434 | -382.55410 | -382.55538 | -382.55342 | -382.55438 | -382.55295 | -382.55351 | -382.55571 |
| K        | -382.58730 | -382.58689 | -382.58738 | -382.58555 | -382.58624 | -382.58783 | -382.58856 | -382.58759 | -382.58776 | -382.58685 | -382.58835 |
| TS-KL    | -382.58963 | -382.58998 | -382.58905 | -382.59122 | -382.58772 | -382.59071 | -382.59129 | -382.58896 | -382.58739 | -382.58980 | -382.59022 |
| L        | -382.59503 | -382.59490 | -382.59589 | -382.59558 | -382.59296 | -382.59389 | -382.59445 | -382.59504 | -382.59479 | -382.59536 | -382.59745 |
| TS-LM    | -382.50363 | -382.50351 | -382.50262 | -382.50344 | -382.50334 | -382.50185 | -382.50439 | -382.50359 | -382.50395 | -382.50465 | -382.50491 |
| TS-LN    | -382.55695 | -382.55319 | -382.55688 | -382.55891 | -382.55949 | -382.55769 | -382.55465 | -382.55839 | -382.55475 | -382.55836 | -382.55718 |
| TS-MN    | -382.53666 | -382.53619 | -382.53728 | -382.53623 | -382.53649 | -382.53934 | -382.53697 | -382.53685 | -382.53396 | -382.53710 | -382.53618 |
| M        | -382.62293 | -382.62507 | -382.62350 | -382.62447 | -382.62329 | -382.62190 | -382.62217 | -382.62141 | -382.62029 | -382.62326 | -382.62393 |
| N        | -382.60016 | -382.60038 | -382.59973 | -382.60101 | -382.60159 | -382.60014 | -382.59890 | -382.60021 | -382.60071 | -382.59872 | -382.60024 |

Table S43: Total energies (in Hartree) of various molecules in the isomer set for HWE-1(2,2)/STO-3G calculations on noisy *FakeQuito* backend with state tomography correction applied

| Molecule | Average    | Run1       | Run2       | Run3       | Run4       | Run5       | Run6       | Run7       | Run8       | Run9       | Run10      |
|----------|------------|------------|------------|------------|------------|------------|------------|------------|------------|------------|------------|
| 1        | -383.51203 | -383.51222 | -383.51288 | -383.51278 | -383.51092 | -383.51177 | -383.51260 | -383.51107 | -383.51269 | -383.51253 | -383.51082 |
| exo-2    | -383.48188 | -383.48166 | -383.48220 | -383.48252 | -383.48209 | -383.48175 | -383.48142 | -383.48193 | -383.48099 | -383.48176 | -383.48249 |
| endo-2   | -383.47490 | -383.47455 | -383.47528 | -383.47500 | -383.47520 | -383.47554 | -383.47447 | -383.47445 | -383.47432 | -383.47563 | -383.47458 |
| 3        | -383.49133 | -383.49253 | -383.49123 | -383.49166 | -383.49079 | -383.49255 | -383.48790 | -383.49212 | -383.49208 | -383.49168 | -383.49078 |
| 4        | -383.48305 | -383.48388 | -383.48372 | -383.48350 | -383.48288 | -383.48377 | -383.48268 | -383.48252 | -383.48171 | -383.48348 | -383.48235 |
| syn-5    | -383.49216 | -383.48854 | -383.49262 | -383.49316 | -383.49238 | -383.49258 | -383.49251 | -383.49105 | -383.49349 | -383.49242 | -383.49282 |
| anti-5   | -383.39295 | -383.39299 | -383.39373 | -383.39232 | -383.39340 | -383.39254 | -383.39341 | -383.39316 | -383.39229 | -383.39271 | -383.39296 |
| syn-6    | -383.48697 | -383.48706 | -383.48733 | -383.48557 | -383.48731 | -383.48672 | -383.48689 | -383.48758 | -383.48767 | -383.48711 | -383.48648 |
| anti-6   | -383.40061 | -383.40127 | -383.39742 | -383.40095 | -383.40177 | -383.40139 | -383.40165 | -383.40133 | -383.40082 | -383.40038 | -383.39913 |
| 7        | -383.46731 | -383.46728 | -383.46824 | -383.46777 | -383.46816 | -383.46601 | -383.46790 | -383.46822 | -383.46795 | -383.46590 | -383.46569 |
| exo-8    | -383.47922 | -383.47849 | -383.47963 | -383.47855 | -383.47946 | -383.47936 | -383.47866 | -383.47936 | -383.47945 | -383.47962 | -383.47960 |
| endo-8   | -383.46332 | -383.46367 | -383.46376 | -383.46120 | -383.46366 | -383.46372 | -383.46306 | -383.46327 | -383.46311 | -383.46412 | -383.46365 |
| 9        | -383.46021 | -383.46020 | -383.46006 | -383.46015 | -383.46074 | -383.45890 | -383.46070 | -383.46054 | -383.46059 | -383.45973 | -383.46053 |
| 10       | -383.46985 | -383.46878 | -383.46939 | -383.47067 | -383.46986 | -383.46827 | -383.47029 | -383.47059 | -383.47001 | -383.47039 | -383.47022 |
| syn-11   | -383.45363 | -383.45376 | -383.45368 | -383.45299 | -383.45392 | -383.45368 | -383.45298 | -383.45425 | -383.45378 | -383.45364 | -383.45362 |
| anti-11  | -383.47005 | -383.47073 | -383.47051 | -383.46963 | -383.46937 | -383.46978 | -383.46904 | -383.47009 | -383.47060 | -383.47056 | -383.47018 |
| 12       | -383.48905 | -383.48214 | -383.48974 | -383.49051 | -383.48876 | -383.49014 | -383.49022 | -383.49038 | -383.49023 | -383.48907 | -383.48931 |
| 13       | -383.47817 | -383.47905 | -383.47716 | -383.47852 | -383.47864 | -383.47595 | -383.47880 | -383.47807 | -383.47745 | -383.47891 | -383.47915 |
| 14       | -383.47733 | -383.47770 | -383.47786 | -383.47821 | -383.47784 | -383.47227 | -383.47802 | -383.47803 | -383.47820 | -383.47737 | -383.47777 |
| 18       | -383.48723 | -383.48708 | -383.48755 | -383.48760 | -383.48762 | -383.48681 | -383.48699 | -383.48747 | -383.48743 | -383.48660 | -383.48711 |
| 19       | -383.49053 | -383.49109 | -383.49075 | -383.49057 | -383.49049 | -383.49132 | -383.49070 | -383.49109 | -383.49071 | -383.48863 | -383.48992 |

Table S44: Total energies (in Hartree) of various molecules in the isomer set for HWE-2(2,2)/STO-3G calculations on noisy *FakeQuito* backend with state tomography correction applied

| Molecule | Average    | Run1       | Run2       | Run3       | Run4       | Run5       | Run6       | Run7       | Run8       | Run9       | Run10      |
|----------|------------|------------|------------|------------|------------|------------|------------|------------|------------|------------|------------|
| 1        | -383.51174 | -383.51182 | -383.51055 | -383.51275 | -383.51302 | -383.51253 | -383.51110 | -383.51274 | -383.51014 | -383.51035 | -383.51239 |
| exo-2    | -383.48134 | -383.48164 | -383.48024 | -383.48241 | -383.48016 | -383.48187 | -383.48222 | -383.48264 | -383.48051 | -383.48096 | -383.48071 |
| endo-2   | -383.47465 | -383.47522 | -383.47551 | -383.47571 | -383.47483 | -383.47564 | -383.47134 | -383.47483 | -383.47264 | -383.47510 | -383.47570 |
| 3        | -383.49182 | -383.49058 | -383.49223 | -383.49252 | -383.49243 | -383.49198 | -383.49030 | -383.49172 | -383.49231 | -383.49204 | -383.49207 |
| 4        | -383.48332 | -383.48257 | -383.48307 | -383.48367 | -383.48352 | -383.48318 | -383.48354 | -383.48316 | -383.48388 | -383.48299 | -383.48367 |
| syn-5    | -383.49237 | -383.49335 | -383.49305 | -383.49315 | -383.49238 | -383.49200 | -383.49255 | -383.49192 | -383.49326 | -383.49222 | -383.48985 |
| anti-5   | -383.39262 | -383.39340 | -383.38746 | -383.39359 | -383.39096 | -383.39268 | -383.39352 | -383.39369 | -383.39358 | -383.39368 | -383.39362 |
| syn-6    | -383.48680 | -383.48706 | -383.48705 | -383.48742 | -383.48732 | -383.48767 | -383.48627 | -383.48667 | -383.48684 | -383.48519 | -383.48653 |
| anti-6   | -383.40074 | -383.40168 | -383.39544 | -383.40049 | -383.40158 | -383.40111 | -383.40142 | -383.40161 | -383.40168 | -383.40136 | -383.40102 |
| 7        | -383.46758 | -383.46728 | -383.46770 | -383.46828 | -383.46817 | -383.46825 | -383.46752 | -383.46842 | -383.46711 | -383.46549 | -383.46763 |
| exo-8    | -383.47876 | -383.47715 | -383.47944 | -383.47946 | -383.47812 | -383.47959 | -383.47954 | -383.47931 | -383.47756 | -383.47786 | -383.47953 |
| endo-8   | -383.46393 | -383.46416 | -383.46413 | -383.46393 | -383.46396 | -383.46390 | -383.46424 | -383.46406 | -383.46403 | -383.46356 | -383.46332 |
| 9        | -383.46011 | -383.46058 | -383.45868 | -383.46027 | -383.46077 | -383.45909 | -383.46052 | -383.46019 | -383.45975 | -383.46078 | -383.46044 |
| 10       | -383.46938 | -383.47045 | -383.46993 | -383.46767 | -383.47020 | -383.47031 | -383.47008 | -383.46823 | -383.46962 | -383.46989 | -383.46744 |
| syn-11   | -383.45266 | -383.45359 | -383.45347 | -383.45235 | -383.45397 | -383.45391 | -383.45429 | -383.44480 | -383.45386 | -383.45206 | -383.45434 |
| anti-11  | -383.47035 | -383.47077 | -383.46927 | -383.47037 | -383.46982 | -383.47093 | -383.47091 | -383.47004 | -383.47064 | -383.47015 | -383.47062 |
| 12       | -383.48971 | -383.49038 | -383.49014 | -383.48856 | -383.48820 | -383.48998 | -383.49007 | -383.48911 | -383.49061 | -383.48952 | -383.49051 |
| 13       | -383.47809 | -383.47802 | -383.47617 | -383.47813 | -383.47891 | -383.47816 | -383.47901 | -383.47838 | -383.47853 | -383.47715 | -383.47847 |
| 14       | -383.47712 | -383.47748 | -383.47789 | -383.47453 | -383.47787 | -383.47824 | -383.47778 | -383.47620 | -383.47753 | -383.47605 | -383.47765 |
| 18       | -383.48697 | -383.48721 | -383.48687 | -383.48719 | -383.48640 | -383.48621 | -383.48712 | -383.48706 | -383.48688 | -383.48731 | -383.48744 |
| 19       | -383.49014 | -383.48906 | -383.49090 | -383.48769 | -383.49084 | -383.49051 | -383.48983 | -383.49040 | -383.49041 | -383.49067 | -383.49110 |

Table S45: Total energies (in Hartree) of various molecules in the isomer set for ESU2-RY(2,2)/STO-3G calculations on noisy *FakeQuito* backend with state tomography correction applied

| Molecule | Average    | Run1       | Run2       | Run3       | Run4       | Run5       | Run6       | Run7       | Run8       | Run9       | Run10      |
|----------|------------|------------|------------|------------|------------|------------|------------|------------|------------|------------|------------|
| 1        | -383.51191 | -383.51141 | -383.51149 | -383.51189 | -383.51205 | -383.51215 | -383.51211 | -383.51199 | -383.51245 | -383.51185 | -383.51168 |
| exo-2    | -383.48164 | -383.48203 | -383.48191 | -383.48186 | -383.48180 | -383.48211 | -383.48183 | -383.48025 | -383.48199 | -383.48063 | -383.48199 |
| endo-2   | -383.47337 | -383.47355 | -383.46884 | -383.47293 | -383.46839 | -383.47514 | -383.47510 | -383.47498 | -383.47465 | -383.47502 | -383.47506 |
| 3        | -383.49161 | -383.49170 | -383.49194 | -383.49167 | -383.49199 | -383.49162 | -383.49049 | -383.49148 | -383.49126 | -383.49208 | -383.49187 |
| 4        | -383.48292 | -383.48293 | -383.48114 | -383.48341 | -383.48327 | -383.48334 | -383.48203 | -383.48308 | -383.48325 | -383.48353 | -383.48318 |
| syn-5    | -383.49209 | -383.49277 | -383.49252 | -383.48942 | -383.49273 | -383.49220 | -383.49287 | -383.49176 | -383.49251 | -383.49156 | -383.49260 |
| anti-5   | -383.39301 | -383.39303 | -383.39293 | -383.39317 | -383.39314 | -383.39284 | -383.39316 | -383.39269 | -383.39295 | -383.39316 | -383.39297 |
| syn-6    | -383.48686 | -383.48698 | -383.48716 | -383.48676 | -383.48668 | -383.48697 | -383.48675 | -383.48700 | -383.48679 | -383.48674 | -383.48678 |
| anti-6   | -383.40095 | -383.40097 | -383.40092 | -383.40128 | -383.40113 | -383.40091 | -383.40123 | -383.40093 | -383.39964 | -383.40113 | -383.40138 |
| 7        | -383.46715 | -383.46745 | -383.46735 | -383.46812 | -383.46680 | -383.46317 | -383.46729 | -383.46768 | -383.46782 | -383.46797 | -383.46784 |
| exo-8    | -383.47797 | -383.47883 | -383.47916 | -383.47897 | -383.47912 | -383.47833 | -383.47928 | -383.46922 | -383.47880 | -383.47905 | -383.47897 |
| endo-8   | -383.46327 | -383.46378 | -383.46300 | -383.46358 | -383.46365 | -383.46358 | -383.46377 | -383.46371 | -383.46338 | -383.46070 | -383.46359 |
| 9        | -383.46007 | -383.45984 | -383.46047 | -383.46000 | -383.45999 | -383.45984 | -383.45999 | -383.46013 | -383.46002 | -383.46017 | -383.46029 |
| 10       | -383.46974 | -383.46989 | -383.46941 | -383.46998 | -383.46992 | -383.46991 | -383.46953 | -383.46962 | -383.46986 | -383.47002 | -383.46926 |
| syn-11   | -383.45339 | -383.45184 | -383.45349 | -383.45359 | -383.45348 | -383.45381 | -383.45350 | -383.45292 | -383.45384 | -383.45347 | -383.45395 |
| anti-11  | -383.46991 | -383.46987 | -383.47050 | -383.46999 | -383.46986 | -383.47028 | -383.47019 | -383.46891 | -383.46939 | -383.47020 | -383.46986 |
| 12       | -383.48969 | -383.48873 | -383.48951 | -383.48931 | -383.48971 | -383.49021 | -383.48991 | -383.49004 | -383.48988 | -383.48981 | -383.48978 |
| 13       | -383.47806 | -383.47792 | -383.47770 | -383.47876 | -383.47834 | -383.47863 | -383.47887 | -383.47522 | -383.47835 | -383.47842 | -383.47844 |
| 14       | -383.47707 | -383.47771 | -383.47750 | -383.47774 | -383.47627 | -383.47728 | -383.47463 | -383.47792 | -383.47694 | -383.47708 | -383.47764 |
| 18       | -383.48643 | -383.48649 | -383.48676 | -383.48643 | -383.48675 | -383.48681 | -383.48358 | -383.48703 | -383.48677 | -383.48690 | -383.48676 |
| 19       | -383.49022 | -383.49083 | -383.49056 | -383.49047 | -383.49068 | -383.49047 | -383.49024 | -383.48812 | -383.49052 | -383.48994 | -383.49036 |

Table S46: Total energies (in Hartree) of various molecules in the isomer set for ESU2-RYRZ(2,2)/STO-3G calculations on noisy *FakeQuito* backend with state tomography correction applied

| Molecule | Average    | Run1       | Run2       | Run3       | Run4       | Run5       | Run6       | Run7       | Run8       | Run9       | Run10      |
|----------|------------|------------|------------|------------|------------|------------|------------|------------|------------|------------|------------|
| 1        | -383.51164 | -383.51243 | -383.51267 | -383.51147 | -383.50596 | -383.51251 | -383.51173 | -383.51208 | -383.51223 | -383.51282 | -383.51253 |
| exo-2    | -383.48183 | -383.48162 | -383.48224 | -383.48259 | -383.48234 | -383.48160 | -383.48105 | -383.48218 | -383.48256 | -383.48251 | -383.47959 |
| endo-2   | -383.47477 | -383.47484 | -383.47522 | -383.47433 | -383.47563 | -383.47510 | -383.47569 | -383.47435 | -383.47426 | -383.47469 | -383.47360 |
| 3        | -383.49155 | -383.49009 | -383.49243 | -383.49218 | -383.49204 | -383.49113 | -383.49106 | -383.49085 | -383.49149 | -383.49189 | -383.49231 |
| 4        | -383.48305 | -383.48326 | -383.48291 | -383.48320 | -383.48385 | -383.48289 | -383.48342 | -383.48188 | -383.48314 | -383.48258 | -383.48341 |
| syn-5    | -383.49269 | -383.49282 | -383.49294 | -383.49264 | -383.49229 | -383.49344 | -383.49018 | -383.49332 | -383.49308 | -383.49274 | -383.49341 |
| anti-5   | -383.39248 | -383.39185 | -383.39363 | -383.39238 | -383.39184 | -383.39365 | -383.39343 | -383.39350 | -383.39376 | -383.38751 | -383.39326 |
| syn-6    | -383.48672 | -383.48738 | -383.48738 | -383.48719 | -383.48607 | -383.48733 | -383.48752 | -383.48658 | -383.48766 | -383.48675 | -383.48339 |
| anti-6   | -383.40101 | -383.40096 | -383.40148 | -383.40031 | -383.40093 | -383.40102 | -383.40127 | -383.40106 | -383.40073 | -383.40141 | -383.40097 |
| 7        | -383.46773 | -383.46852 | -383.46693 | -383.46813 | -383.46710 | -383.46746 | -383.46819 | -383.46782 | -383.46767 | -383.46836 | -383.46707 |
| exo-8    | -383.47815 | -383.47903 | -383.47852 | -383.47020 | -383.47850 | -383.47961 | -383.47945 | -383.47884 | -383.47886 | -383.47889 | -383.47961 |
| endo-8   | -383.46272 | -383.46366 | -383.46373 | -383.46321 | -383.46401 | -383.46237 | -383.45748 | -383.46383 | -383.46310 | -383.46319 | -383.46261 |
| 9        | -383.46017 | -383.46054 | -383.46023 | -383.46028 | -383.46043 | -383.45979 | -383.46041 | -383.45968 | -383.45920 | -383.46066 | -383.46053 |
| 10       | -383.46989 | -383.46984 | -383.46984 | -383.46962 | -383.47006 | -383.47053 | -383.47019 | -383.46979 | -383.46900 | -383.47059 | -383.46946 |
| syn-11   | -383.45378 | -383.45407 | -383.45305 | -383.45418 | -383.45418 | -383.45372 | -383.45427 | -383.45329 | -383.45428 | -383.45323 | -383.45350 |
| anti-11  | -383.47001 | -383.47065 | -383.47077 | -383.46883 | -383.47082 | -383.47021 | -383.47018 | -383.46998 | -383.47083 | -383.46708 | -383.47078 |
| 12       | -383.48952 | -383.48967 | -383.48924 | -383.48998 | -383.48935 | -383.48829 | -383.48951 | -383.48993 | -383.48976 | -383.48947 | -383.49004 |
| 13       | -383.47850 | -383.47864 | -383.47885 | -383.47820 | -383.47834 | -383.47699 | -383.47868 | -383.47900 | -383.47873 | -383.47873 | -383.47881 |
| 14       | -383.47699 | -383.47791 | -383.47807 | -383.47788 | -383.47782 | -383.46880 | -383.47815 | -383.47780 | -383.47826 | -383.47804 | -383.47718 |
| 18       | -383.48710 | -383.48648 | -383.48753 | -383.48679 | -383.48752 | -383.48758 | -383.48731 | -383.48668 | -383.48728 | -383.48735 | -383.48644 |
| 19       | -383.49011 | -383.48931 | -383.49052 | -383.48920 | -383.49112 | -383.49085 | -383.49120 | -383.49133 | -383.48815 | -383.48967 | -383.48976 |

Table S47: Total energies (in Hartree) of various molecules in the isomer set for EXCT. PRESERV.(2,2)/STO-3G calculations on noisy *FakeQuito* backend with state tomography correction applied

| Molecule | Average    | Run1       | Run2       | Run3       | Run4       | Run5       | Run6       | Run7       | Run8       | Run9       | Run10      |
|----------|------------|------------|------------|------------|------------|------------|------------|------------|------------|------------|------------|
| 1        | -383.51112 | -383.51186 | -383.51083 | -383.51134 | -383.51052 | -383.51060 | -383.51100 | -383.51110 | -383.51168 | -383.51120 | -383.51107 |
| exo-2    | -383.48087 | -383.48085 | -383.48170 | -383.48138 | -383.48015 | -383.48108 | -383.48064 | -383.48050 | -383.48078 | -383.48119 | -383.48049 |
| endo-2   | -383.47387 | -383.47381 | -383.47466 | -383.47341 | -383.47429 | -383.47443 | -383.47365 | -383.47368 | -383.47370 | -383.47384 | -383.47318 |
| 3        | -383.49078 | -383.49040 | -383.49100 | -383.49118 | -383.49054 | -383.49066 | -383.49081 | -383.49097 | -383.49103 | -383.49015 | -383.49106 |
| 4        | -383.48187 | -383.48190 | -383.48211 | -383.48051 | -383.48198 | -383.48149 | -383.48176 | -383.48267 | -383.48182 | -383.48232 | -383.48213 |
| syn-5    | -383.49195 | -383.49166 | -383.49222 | -383.49191 | -383.49239 | -383.49242 | -383.49226 | -383.49205 | -383.49203 | -383.49096 | -383.49157 |
| anti-5   | -383.39217 | -383.39151 | -383.39249 | -383.39230 | -383.39244 | -383.39209 | -383.39177 | -383.39190 | -383.39260 | -383.39231 | -383.39226 |
| syn-6    | -383.48619 | -383.48561 | -383.48667 | -383.48676 | -383.48648 | -383.48613 | -383.48609 | -383.48625 | -383.48600 | -383.48610 | -383.48578 |
| anti-6   | -383.39996 | -383.39971 | -383.39993 | -383.40058 | -383.39961 | -383.39866 | -383.40008 | -383.40040 | -383.40022 | -383.40034 | -383.40008 |
| 7        | -383.46671 | -383.46639 | -383.46637 | -383.46726 | -383.46680 | -383.46649 | -383.46674 | -383.46715 | -383.46618 | -383.46698 | -383.46671 |
| exo-8    | -383.47789 | -383.47767 | -383.47794 | -383.47751 | -383.47824 | -383.47800 | -383.47735 | -383.47781 | -383.47849 | -383.47755 | -383.47832 |
| endo-8   | -383.46256 | -383.46201 | -383.46225 | -383.46322 | -383.46218 | -383.46295 | -383.46243 | -383.46278 | -383.46314 | -383.46236 | -383.46231 |
| 9        | -383.45928 | -383.45890 | -383.45909 | -383.45983 | -383.45920 | -383.45907 | -383.45923 | -383.45913 | -383.45932 | -383.45971 | -383.45933 |
| 10       | -383.46877 | -383.46902 | -383.46914 | -383.46846 | -383.46853 | -383.46918 | -383.46864 | -383.46903 | -383.46888 | -383.46850 | -383.46832 |
| syn-11   | -383.45282 | -383.45238 | -383.45216 | -383.45285 | -383.45245 | -383.45298 | -383.45253 | -383.45361 | -383.45304 | -383.45349 | -383.45269 |
| anti-11  | -383.46915 | -383.46914 | -383.46923 | -383.46914 | -383.46973 | -383.46894 | -383.46836 | -383.46970 | -383.46952 | -383.46906 | -383.46872 |
| 12       | -383.48863 | -383.48894 | -383.48844 | -383.48816 | -383.48904 | -383.48820 | -383.48890 | -383.48820 | -383.48829 | -383.48848 | -383.48968 |
| 13       | -383.47741 | -383.47709 | -383.47728 | -383.47715 | -383.47713 | -383.47780 | -383.47773 | -383.47715 | -383.47740 | -383.47766 | -383.47769 |
| 14       | -383.47640 | -383.47605 | -383.47603 | -383.47593 | -383.47634 | -383.47635 | -383.47633 | -383.47715 | -383.47655 | -383.47639 | -383.47686 |
| 18       | -383.48587 | -383.48647 | -383.48580 | -383.48547 | -383.48575 | -383.48607 | -383.48546 | -383.48568 | -383.48636 | -383.48606 | -383.48562 |
| 19       | -383.48967 | -383.48957 | -383.49004 | -383.48999 | -383.48996 | -383.48912 | -383.48911 | -383.48950 | -383.48966 | -383.49003 | -383.48970 |

Table S48: Total energies (in Hartree) of various molecules in the reaction set for HWE-1(2,2)/STO-3G calculations on noisy *FakeQuito* backend with state tomography correction applied

| Molecule | Average    | Run1       | Run2       | Run3       | Run4       | Run5       | Run6       | Run7       | Run8       | Run9       | Run10      |
|----------|------------|------------|------------|------------|------------|------------|------------|------------|------------|------------|------------|
| A        | -382.65886 | -382.65868 | -382.65862 | -382.65901 | -382.65909 | -382.65907 | -382.65889 | -382.65875 | -382.65903 | -382.65890 | -382.65854 |
| TS-AA'   | -382.62589 | -382.62527 | -382.62610 | -382.62604 | -382.62598 | -382.62634 | -382.62597 | -382.62552 | -382.62531 | -382.62658 | -382.62573 |
| A'       | -382.65861 | -382.65794 | -382.65893 | -382.65917 | -382.65912 | -382.65867 | -382.65895 | -382.65730 | -382.65880 | -382.65851 | -382.65871 |
| F        | -382.61940 | -382.61988 | -382.61949 | -382.61879 | -382.61925 | -382.61965 | -382.61992 | -382.61977 | -382.61933 | -382.61907 | -382.61880 |
| TS-FG    | -382.61167 | -382.61265 | -382.60962 | -382.61239 | -382.61235 | -382.61019 | -382.60997 | -382.61210 | -382.61281 | -382.61213 | -382.61252 |
| G        | -382.66068 | -382.66151 | -382.66169 | -382.66037 | -382.65947 | -382.66179 | -382.65889 | -382.66040 | -382.66166 | -382.66074 | -382.66032 |
| TS-GG'   | -382.65069 | -382.64872 | -382.65230 | -382.65104 | -382.65059 | -382.64988 | -382.65021 | -382.65143 | -382.65226 | -382.64827 | -382.65220 |
| G'       | -382.66068 | -382.66162 | -382.66054 | -382.66162 | -382.66103 | -382.66128 | -382.66158 | -382.65568 | -382.66118 | -382.66074 | -382.66151 |
| J        | -382.66095 | -382.65934 | -382.66113 | -382.66179 | -382.66210 | -382.66264 | -382.66268 | -382.66051 | -382.66229 | -382.65747 | -382.65958 |
| TS-JK    | -382.60632 | -382.60651 | -382.60688 | -382.60707 | -382.60678 | -382.60656 | -382.60419 | -382.60663 | -382.60681 | -382.60486 | -382.60696 |
| K        | -382.64020 | -382.64002 | -382.64034 | -382.64011 | -382.64036 | -382.64037 | -382.63990 | -382.64064 | -382.64053 | -382.63925 | -382.64050 |
| TS-KL    | -382.63656 | -382.63471 | -382.63562 | -382.63679 | -382.63819 | -382.63815 | -382.63077 | -382.63781 | -382.63741 | -382.63811 | -382.63805 |
| L        | -382.64887 | -382.64981 | -382.64994 | -382.64975 | -382.64146 | -382.64966 | -382.64944 | -382.64957 | -382.64949 | -382.64990 | -382.64966 |
| TS-LM    | -382.54187 | -382.54162 | -382.54210 | -382.54200 | -382.54137 | -382.54185 | -382.54201 | -382.54194 | -382.54191 | -382.54223 | -382.54171 |
| TS-LN    | -382.62193 | -382.62325 | -382.62283 | -382.62271 | -382.62209 | -382.62285 | -382.61388 | -382.62314 | -382.62324 | -382.62268 | -382.62262 |
| TS-MN    | -382.58419 | -382.58621 | -382.57797 | -382.58450 | -382.58274 | -382.58610 | -382.58611 | -382.58076 | -382.58536 | -382.58605 | -382.58611 |
| M        | -382.66705 | -382.66719 | -382.66641 | -382.66701 | -382.66684 | -382.66726 | -382.66706 | -382.66726 | -382.66729 | -382.66691 | -382.66721 |
| N        | -382.64441 | -382.64479 | -382.64459 | -382.64425 | -382.64373 | -382.64489 | -382.64452 | -382.64449 | -382.64423 | -382.64359 | -382.64497 |

Table S49: Total energies (in Hartree) of various molecules in the reaction set for HWE-2(2,2)/STO-3G calculations on noisy *FakeQuito* backend with state tomography correction applied

| Molecule | Average    | Run1       | Run2       | Run3       | Run4       | Run5       | Run6       | Run7       | Run8       | Run9       | Run10      |
|----------|------------|------------|------------|------------|------------|------------|------------|------------|------------|------------|------------|
| A        | -382.65833 | -382.65837 | -382.65891 | -382.65897 | -382.65903 | -382.65807 | -382.65733 | -382.65891 | -382.65891 | -382.65582 | -382.65900 |
| TS-AA'   | -382.62543 | -382.62451 | -382.62591 | -382.62417 | -382.62660 | -382.62533 | -382.62631 | -382.62406 | -382.62508 | -382.62638 | -382.62592 |
| A'       | -382.65810 | -382.65892 | -382.65891 | -382.65865 | -382.65444 | -382.65852 | -382.65841 | -382.65847 | -382.65882 | -382.65843 | -382.65742 |
| F        | -382.61912 | -382.61876 | -382.61751 | -382.61734 | -382.61970 | -382.61989 | -382.61986 | -382.61944 | -382.61958 | -382.61939 | -382.61977 |
| TS-FG    | -382.61136 | -382.61230 | -382.61216 | -382.61229 | -382.60892 | -382.61231 | -382.61262 | -382.61272 | -382.60529 | -382.61230 | -382.61271 |
| G        | -382.66176 | -382.66192 | -382.66092 | -382.66182 | -382.66196 | -382.66172 | -382.66197 | -382.66208 | -382.66176 | -382.66186 | -382.66162 |
| TS-GG'   | -382.65106 | -382.64626 | -382.65250 | -382.65116 | -382.65241 | -382.64675 | -382.65221 | -382.65225 | -382.65248 | -382.65226 | -382.65232 |
| G'       | -382.66133 | -382.66213 | -382.66146 | -382.66143 | -382.66199 | -382.66070 | -382.66162 | -382.66155 | -382.66054 | -382.66169 | -382.66020 |
| J        | -382.66123 | -382.65583 | -382.66258 | -382.66110 | -382.66260 | -382.66216 | -382.66031 | -382.66160 | -382.66228 | -382.66127 | -382.66253 |
| TS-JK    | -382.60634 | -382.60527 | -382.60690 | -382.60710 | -382.60690 | -382.60708 | -382.60586 | -382.60509 | -382.60587 | -382.60641 | -382.60695 |
| K        | -382.64000 | -382.64046 | -382.63996 | -382.63940 | -382.64048 | -382.64025 | -382.64043 | -382.64001 | -382.64023 | -382.63854 | -382.64028 |
| TS-KL    | -382.63751 | -382.63808 | -382.63790 | -382.63716 | -382.63797 | -382.63786 | -382.63788 | -382.63696 | -382.63711 | -382.63602 | -382.63813 |
| L        | -382.64927 | -382.64980 | -382.64819 | -382.64894 | -382.64973 | -382.64981 | -382.64916 | -382.64855 | -382.64991 | -382.64936 | -382.64926 |
| TS-LM    | -382.54144 | -382.54202 | -382.54181 | -382.53844 | -382.54230 | -382.54223 | -382.54030 | -382.54181 | -382.54236 | -382.54084 | -382.54226 |
| TS-LN    | -382.62198 | -382.62255 | -382.62310 | -382.62306 | -382.62035 | -382.62158 | -382.62199 | -382.61954 | -382.62216 | -382.62307 | -382.62242 |
| TS-MN    | -382.58529 | -382.58427 | -382.58606 | -382.58408 | -382.58588 | -382.58512 | -382.58559 | -382.58363 | -382.58632 | -382.58585 | -382.58608 |
| M        | -382.66552 | -382.66657 | -382.66732 | -382.66715 | -382.66664 | -382.66720 | -382.66491 | -382.66704 | -382.66503 | -382.65831 | -382.66499 |
| N        | -382.64338 | -382.63906 | -382.64497 | -382.64310 | -382.64470 | -382.64418 | -382.64510 | -382.64337 | -382.64516 | -382.63962 | -382.64459 |



Table S50: Total energies (in Hartree) of various molecules in the reaction set for ESU2-RY(2,2)/STO-3G calculations on noisy *FakeQuito* backend with state tomography correction applied

| Molecule | Average    | Run1       | Run2       | Run3       | Run4       | Run5       | Run6       | Run7       | Run8       | Run9       | Run10      |
|----------|------------|------------|------------|------------|------------|------------|------------|------------|------------|------------|------------|
| A        | -382.65854 | -382.65886 | -382.65824 | -382.65872 | -382.65832 | -382.65870 | -382.65897 | -382.65892 | -382.65885 | -382.65697 | -382.65890 |
| TS-AA'   | -382.62505 | -382.62607 | -382.62597 | -382.62613 | -382.62617 | -382.62398 | -382.62614 | -382.62607 | -382.61799 | -382.62605 | -382.62596 |
| A'       | -382.65843 | -382.65865 | -382.65846 | -382.65875 | -382.65833 | -382.65604 | -382.65864 | -382.65868 | -382.65885 | -382.65900 | -382.65891 |
| F        | -382.61886 | -382.61896 | -382.61530 | -382.61946 | -382.61926 | -382.61966 | -382.61940 | -382.61894 | -382.61911 | -382.61963 | -382.61892 |
| TS-FG    | -382.61134 | -382.61195 | -382.61172 | -382.61254 | -382.61251 | -382.61180 | -382.61233 | -382.61210 | -382.60535 | -382.61199 | -382.61110 |
| G        | -382.66149 | -382.66173 | -382.66180 | -382.66162 | -382.66189 | -382.66133 | -382.66128 | -382.66167 | -382.66058 | -382.66179 | -382.66126 |
| TS-GG'   | -382.65155 | -382.65221 | -382.65204 | -382.65198 | -382.64679 | -382.65220 | -382.65207 | -382.65231 | -382.65181 | -382.65201 | -382.65206 |
| G'       | -382.66062 | -382.66188 | -382.66168 | -382.65620 | -382.66182 | -382.66191 | -382.66196 | -382.65941 | -382.66147 | -382.65987 | -382.66001 |
| J        | -382.66203 | -382.66217 | -382.66236 | -382.66227 | -382.66237 | -382.66248 | -382.66248 | -382.66161 | -382.65977 | -382.66240 | -382.66240 |
| TS-JK    | -382.60647 | -382.60671 | -382.60671 | -382.60523 | -382.60646 | -382.60669 | -382.60678 | -382.60657 | -382.60659 | -382.60673 | -382.60624 |
| K        | -382.63990 | -382.64012 | -382.64038 | -382.64035 | -382.63999 | -382.64019 | -382.64005 | -382.63976 | -382.63751 | -382.64022 | -382.64040 |
| TS-KL    | -382.63764 | -382.63768 | -382.63751 | -382.63793 | -382.63790 | -382.63770 | -382.63785 | -382.63786 | -382.63737 | -382.63712 | -382.63744 |
| L        | -382.64944 | -382.64936 | -382.64956 | -382.64936 | -382.64935 | -382.64950 | -382.64948 | -382.64904 | -382.64964 | -382.64953 | -382.64956 |
| TS-LM    | -382.54201 | -382.54157 | -382.54203 | -382.54195 | -382.54210 | -382.54167 | -382.54213 | -382.54219 | -382.54219 | -382.54221 | -382.54205 |
| TS-LN    | -382.62261 | -382.62288 | -382.62277 | -382.62229 | -382.62276 | -382.62282 | -382.62276 | -382.62187 | -382.62277 | -382.62241 | -382.62276 |
| TS-MN    | -382.58580 | -382.58613 | -382.58585 | -382.58601 | -382.58613 | -382.58593 | -382.58592 | -382.58506 | -382.58474 | -382.58611 | -382.58610 |
| M        | -382.66605 | -382.65830 | -382.66693 | -382.66656 | -382.66708 | -382.66710 | -382.66695 | -382.66683 | -382.66683 | -382.66703 | -382.66693 |
| N        | -382.64476 | -382.64475 | -382.64484 | -382.64462 | -382.64489 | -382.64474 | -382.64487 | -382.64447 | -382.64480 | -382.64480 | -382.64480 |

Table S51: Total energies (in Hartree) of various molecules in the reaction set for ESU2-RYRZ(2,2)/STO-3G calculations on noisy *FakeQuito* backend with state tomography correction applied

| Molecule | Average    | Run1       | Run2       | Run3       | Run4       | Run5       | Run6       | Run7       | Run8       | Run9       | Run10      |
|----------|------------|------------|------------|------------|------------|------------|------------|------------|------------|------------|------------|
| A        | -382.65841 | -382.65919 | -382.65900 | -382.65795 | -382.65869 | -382.65727 | -382.65911 | -382.65649 | -382.65902 | -382.65818 | -382.65915 |
| TS-AA'   | -382.62552 | -382.62410 | -382.62613 | -382.62646 | -382.62614 | -382.62626 | -382.62590 | -382.62561 | -382.62565 | -382.62607 | -382.62289 |
| A'       | -382.65791 | -382.65766 | -382.65672 | -382.65911 | -382.65864 | -382.65580 | -382.65635 | -382.65855 | -382.65871 | -382.65852 | -382.65899 |
| F        | -382.61940 | -382.61740 | -382.61991 | -382.61963 | -382.61990 | -382.61976 | -382.61979 | -382.61965 | -382.61976 | -382.61959 | -382.61858 |
| TS-FG    | -382.61103 | -382.61270 | -382.61254 | -382.61119 | -382.61230 | -382.61243 | -382.61008 | -382.60403 | -382.60991 | -382.61268 | -382.61248 |
| G        | -382.66010 | -382.65387 | -382.66044 | -382.66188 | -382.65921 | -382.66090 | -382.66072 | -382.66099 | -382.66134 | -382.66133 | -382.66028 |
| TS-GG'   | -382.65022 | -382.64955 | -382.64798 | -382.65152 | -382.65107 | -382.64786 | -382.65240 | -382.65169 | -382.65069 | -382.65152 | -382.64791 |
| G'       | -382.66101 | -382.66083 | -382.66024 | -382.66119 | -382.66135 | -382.66086 | -382.66152 | -382.66134 | -382.66057 | -382.66106 | -382.66113 |
| J        | -382.66099 | -382.66110 | -382.65968 | -382.66239 | -382.66250 | -382.66139 | -382.66070 | -382.66194 | -382.65925 | -382.66147 | -382.65951 |
| TS-JK    | -382.60622 | -382.60686 | -382.60661 | -382.60490 | -382.60689 | -382.60623 | -382.60704 | -382.60665 | -382.60689 | -382.60378 | -382.60633 |
| K        | -382.63938 | -382.63784 | -382.64052 | -382.63926 | -382.63881 | -382.63972 | -382.64060 | -382.64037 | -382.64027 | -382.63695 | -382.63949 |
| TS-KL    | -382.63710 | -382.63711 | -382.63813 | -382.63796 | -382.63741 | -382.63473 | -382.63788 | -382.63809 | -382.63619 | -382.63699 | -382.63656 |
| L        | -382.64906 | -382.64894 | -382.64838 | -382.64972 | -382.64865 | -382.64791 | -382.64949 | -382.64881 | -382.64931 | -382.64990 | -382.64954 |
| TS-LM    | -382.54168 | -382.54210 | -382.54153 | -382.54197 | -382.54189 | -382.54164 | -382.54193 | -382.54168 | -382.54150 | -382.54127 | -382.54131 |
| TS-LN    | -382.62266 | -382.62320 | -382.62022 | -382.62275 | -382.62309 | -382.62314 | -382.62262 | -382.62316 | -382.62323 | -382.62243 | -382.62277 |
| TS-MN    | -382.58581 | -382.58553 | -382.58640 | -382.58632 | -382.58523 | -382.58609 | -382.58637 | -382.58620 | -382.58567 | -382.58427 | -382.58601 |
| M        | -382.66690 | -382.66553 | -382.66725 | -382.66717 | -382.66723 | -382.66665 | -382.66674 | -382.66705 | -382.66695 | -382.66730 | -382.66716 |
| N        | -382.64392 | -382.64437 | -382.63971 | -382.64478 | -382.64480 | -382.64515 | -382.64469 | -382.64267 | -382.64428 | -382.64429 | -382.64448 |

Table S52: Total energies (in Hartree) of various molecules in the reaction set for EXCT. PRESERV.(2,2)/STO-3G calculations on noisy *FakeQuito* backend with state tomography correction applied

| Molecule | Average    | Run1       | Run2       | Run3       | Run4       | Run5       | Run6       | Run7       | Run8       | Run9       | Run10      |
|----------|------------|------------|------------|------------|------------|------------|------------|------------|------------|------------|------------|
| A        | -382.65827 | -382.65803 | -382.65768 | -382.65816 | -382.65830 | -382.65821 | -382.65860 | -382.65817 | -382.65846 | -382.65869 | -382.65841 |
| TS-AA'   | -382.62525 | -382.62534 | -382.62529 | -382.62466 | -382.62533 | -382.62507 | -382.62561 | -382.62483 | -382.62536 | -382.62567 | -382.62532 |
| A'       | -382.65832 | -382.65820 | -382.65869 | -382.65808 | -382.65837 | -382.65858 | -382.65807 | -382.65858 | -382.65763 | -382.65865 | -382.65834 |
| F        | -382.61880 | -382.61855 | -382.61907 | -382.61905 | -382.61867 | -382.61899 | -382.61862 | -382.61878 | -382.61857 | -382.61856 | -382.61910 |
| TS-FG    | -382.61193 | -382.61183 | -382.61154 | -382.61194 | -382.61207 | -382.61191 | -382.61188 | -382.61186 | -382.61215 | -382.61209 | -382.61207 |
| G        | -382.66142 | -382.66178 | -382.66156 | -382.66107 | -382.66145 | -382.66135 | -382.66171 | -382.66072 | -382.66128 | -382.66172 | -382.66155 |
| TS-GG'   | -382.65095 | -382.65161 | -382.65045 | -382.65119 | -382.65081 | -382.65088 | -382.65086 | -382.65058 | -382.65116 | -382.65136 | -382.65063 |
| G'       | -382.66117 | -382.66075 | -382.66144 | -382.66155 | -382.66155 | -382.66104 | -382.66154 | -382.66057 | -382.66163 | -382.66078 | -382.66085 |
| J        | -382.66122 | -382.66168 | -382.65810 | -382.66079 | -382.66232 | -382.66227 | -382.66150 | -382.66066 | -382.66024 | -382.66231 | -382.66237 |
| TS-JK    | -382.60609 | -382.60632 | -382.60618 | -382.60607 | -382.60631 | -382.60521 | -382.60623 | -382.60598 | -382.60659 | -382.60623 | -382.60576 |
| K        | -382.63977 | -382.63966 | -382.64010 | -382.63963 | -382.63997 | -382.63986 | -382.63940 | -382.64007 | -382.64002 | -382.63969 | -382.63928 |
| TS-KL    | -382.63727 | -382.63724 | -382.63709 | -382.63763 | -382.63744 | -382.63717 | -382.63725 | -382.63753 | -382.63696 | -382.63718 | -382.63716 |
| L        | -382.64900 | -382.64904 | -382.64925 | -382.64883 | -382.64845 | -382.64912 | -382.64882 | -382.64896 | -382.64929 | -382.64916 | -382.64907 |
| TS-LM    | -382.54127 | -382.54151 | -382.54149 | -382.54162 | -382.54095 | -382.54116 | -382.54078 | -382.54083 | -382.54191 | -382.54060 | -382.54181 |
| TS-LN    | -382.62199 | -382.62244 | -382.62154 | -382.62223 | -382.62166 | -382.62143 | -382.62175 | -382.62186 | -382.62235 | -382.62219 | -382.62242 |
| TS-MN    | -382.58546 | -382.58491 | -382.58602 | -382.58526 | -382.58558 | -382.58524 | -382.58565 | -382.58584 | -382.58548 | -382.58523 | -382.58544 |
| M        | -382.66647 | -382.66638 | -382.66638 | -382.66633 | -382.66671 | -382.66640 | -382.66616 | -382.66623 | -382.66655 | -382.66692 | -382.66663 |
| N        | -382.64438 | -382.64443 | -382.64397 | -382.64478 | -382.64434 | -382.64376 | -382.64432 | -382.64465 | -382.64459 | -382.64448 | -382.64453 |

Table S53: Total energies (in Hartree) of various molecules in the isomer set for EXCT. PRESERV.(2,2)/STO-3G calculations on noisy *ibmq\_quito* device

| Molecule | None       | STC        | Statevector |
|----------|------------|------------|-------------|
| 1        | -383.42524 | -383.51013 | -383.51279  |
| exo-2    | -383.41282 | -383.47895 | -383.48273  |
| endo-2   | -383.39876 | -383.47209 | -383.47575  |
| 3        | -383.41010 | -383.49152 | -383.49253  |
| 4        | -383.43132 | -383.48088 | -383.48392  |
| syn-5    | -383.42507 | -383.48572 | -383.49351  |
| anti-5   | -383.32827 | -383.39145 | -383.39376  |
| syn-6    | -383.40219 | -383.48697 | -383.48779  |
| anti-6   | -383.34609 | -383.39930 | -383.40164  |
| 7        | -383.41133 | -383.46299 | -383.46813  |
| exo-8    | -383.42402 | -383.47477 | -383.47964  |
| endo-8   | -383.40416 | -383.45788 | -383.46422  |
| 9        | -383.38677 | -383.45618 | -383.46075  |
| 10       | -383.41130 | -383.46589 | -383.47071  |
| syn-11   | -383.37798 | -383.45167 | -383.45443  |
| anti-11  | -383.39940 | -383.46288 | -383.47093  |
| 12       | -383.42184 | -383.48988 | -383.49041  |
| 13       | -383.41147 | -383.47509 | -383.47913  |
| 14       | -383.40750 | -383.47764 | -383.47845  |
| 18       | -383.39546 | -383.48609 | -383.48745  |
| 19       | -383.42818 | -383.49040 | -383.49132  |

Table S54: Total energies (in Hartree) of various molecules in the reaction set for EXCT. PRESERV.(2,2)/STO-3G calculations on noisy *ibmq\_quito* device

| <b>Molecule</b> | <b>None</b> | <b>STC</b> | <b>Statevector</b> |
|-----------------|-------------|------------|--------------------|
| A               | -382.60557  | -382.65688 | -382.65921         |
| TS-AA'          | -382.55739  | -382.62574 | -382.62629         |
| A'              | -382.60342  | -382.65485 | -382.65915         |
| F               | -382.54360  | -382.61811 | -382.61999         |
| TS-FG           | -382.53630  | -382.61255 | -382.61290         |
| G               | -382.61620  | -382.65854 | -382.66174         |
| TS-GG'          | -382.59765  | -382.64752 | -382.65037         |
| G'              | -382.61122  | -382.66030 | -382.66121         |
| J               | -382.61043  | -382.65805 | -382.66163         |
| TS-JK           | -382.55401  | -382.60634 | -382.60710         |
| K               | -382.58724  | -382.63934 | -382.64066         |
| TS-KL           | -382.58363  | -382.63595 | -382.63820         |
| L               | -382.58723  | -382.64911 | -382.65000         |
| TS-LM           | -382.49882  | -382.54111 | -382.54203         |
| TS-LN           | -382.53977  | -382.62226 | -382.62330         |
| TS-MN           | -382.53296  | -382.58413 | -382.58636         |
| M               | -382.61950  | -382.66527 | -382.66722         |
| N               | -382.59739  | -382.64413 | -382.64514         |

Table S55: Comparison of literature molecular mechanics (MM) data of various molecules in the isomer set with reference (Ref) data computed using composite methods

| MM order | $\Delta H_f^{iso}$ | Ref order | $\Delta E_{ref}^{iso}$ |
|----------|--------------------|-----------|------------------------|
| 1        | 0.0                | 1         | 0.0                    |
| syn-5    | 8.9                | 3         | 10.6                   |
| 3        | 11.5               | 12        | 12.0                   |
| 14       | 12.4               | 19        | 13.2                   |
| 18       | 13.2               | syn-5     | 13.4                   |
| 19       | 13.9               | 18        | 14.1                   |
| 12       | 13.9               | syn-6     | 14.2                   |
| syn-6    | 14.7               | 4         | 14.7                   |
| exo-2    | 15.8               | exo-2     | 15.1                   |
| exo-8    | 15.9               | exo-8     | 17.3                   |
| 13       | 16.8               | 13        | 17.6                   |
| 4        | 19.3               | 14        | 19.1                   |
| endo-2   | 20.3               | endo-2    | 19.2                   |
| 7        | 21.7               | anti-11   | 19.2                   |
| endo-8   | 22.2               | 10        | 20.9                   |
| anti-11  | 23.9               | 7         | 22.3                   |
| 10       | 24.1               | endo-8    | 23.9                   |
| 9        | 26.0               | 9         | 25.5                   |
| syn-11   | 33.6               | syn-11    | 28.6                   |
| –        | –                  | anti-6    | 51.4                   |
| –        | –                  | anti-5    | 58.8                   |
